# Supplementary material for: Effect of orienteering experience on walking and running in the absence of vision and hearing
Source: PeerJ. 2019 Sep 26;7:e7736. doi: 10.7717/peerj.7736 (PMC6766364; doi:10.7717/peerj.7736)
Supplement: Dataset S1 [file peerj-07-7736-s001.xlsx]

## Sheet: Walking 1
Grid	Szer./dł. hddd°mm.mmm'
Datum	WGS 84
Header	Name	Elapsed Time	Length	Average Speed
Track	Foot-O-W5 (walking 1)	00:04:58	262 m	3 kph
Header	Position	Altitude	Depth	Temperature	Leg Length	Leg Time	Leg Speed	Leg Course
Trackpoint	N51 12.241 E16 59.903	110 m
Trackpoint	N51 12.241 E16 59.904	109 m			1 m	00:00:01	4 kph	103° true
Trackpoint	N51 12.241 E16 59.905	109 m			1 m	00:00:01	5 kph	106° true
Trackpoint	N51 12.241 E16 59.906	109 m			1 m	00:00:01	5 kph	105° true
Trackpoint	N51 12.241 E16 59.907	109 m			1 m	00:00:01	5 kph	103° true
Trackpoint	N51 12.240 E16 59.908	109 m			1 m	00:00:01	4 kph	104° true
Trackpoint	N51 12.240 E16 59.909	109 m			1 m	00:00:01	4 kph	104° true
Trackpoint	N51 12.240 E16 59.910	109 m			1 m	00:00:01	4 kph	104° true
Trackpoint	N51 12.240 E16 59.911	109 m			1 m	00:00:01	4 kph	103° true
Trackpoint	N51 12.240 E16 59.912	110 m			1 m	00:00:01	4 kph	103° true
Trackpoint	N51 12.240 E16 59.913	110 m			1 m	00:00:01	4 kph	104° true
Trackpoint	N51 12.240 E16 59.914	110 m			1 m	00:00:01	4 kph	104° true
Trackpoint	N51 12.239 E16 59.915	109 m			1 m	00:00:01	4 kph	105° true
Trackpoint	N51 12.239 E16 59.915	109 m			1 m	00:00:01	4 kph	105° true
Trackpoint	N51 12.239 E16 59.916	109 m			1 m	00:00:01	4 kph	106° true
Trackpoint	N51 12.239 E16 59.917	109 m			1 m	00:00:01	4 kph	104° true
Trackpoint	N51 12.239 E16 59.918	110 m			1 m	00:00:01	4 kph	107° true
Trackpoint	N51 12.239 E16 59.919	109 m			1 m	00:00:01	4 kph	109° true
Trackpoint	N51 12.238 E16 59.920	109 m			1 m	00:00:01	4 kph	108° true
Trackpoint	N51 12.238 E16 59.920	109 m			1 m	00:00:01	4 kph	109° true
Trackpoint	N51 12.238 E16 59.921	109 m			1 m	00:00:01	4 kph	107° true
Trackpoint	N51 12.238 E16 59.922	109 m			1 m	00:00:01	3 kph	102° true
Trackpoint	N51 12.238 E16 59.923	109 m			1 m	00:00:01	3 kph	100° true
Trackpoint	N51 12.238 E16 59.924	109 m			1 m	00:00:01	3 kph	102° true
Trackpoint	N51 12.238 E16 59.924	110 m			1 m	00:00:01	3 kph	105° true
Trackpoint	N51 12.238 E16 59.925	109 m			1 m	00:00:01	4 kph	104° true
Trackpoint	N51 12.237 E16 59.926	109 m			1 m	00:00:01	3 kph	103° true
Trackpoint	N51 12.237 E16 59.927	109 m			1 m	00:00:01	3 kph	102° true
Trackpoint	N51 12.237 E16 59.928	109 m			1 m	00:00:01	4 kph	106° true
Trackpoint	N51 12.237 E16 59.928	109 m			1 m	00:00:01	4 kph	113° true
Trackpoint	N51 12.237 E16 59.929	109 m			1 m	00:00:01	4 kph	118° true
Trackpoint	N51 12.236 E16 59.930	110 m			1 m	00:00:01	4 kph	121° true
Trackpoint	N51 12.236 E16 59.931	109 m			1 m	00:00:01	4 kph	123° true
Trackpoint	N51 12.236 E16 59.931	109 m			1 m	00:00:01	4 kph	124° true
Trackpoint	N51 12.236 E16 59.932	109 m			1 m	00:00:01	4 kph	126° true
Trackpoint	N51 12.235 E16 59.933	109 m			1 m	00:00:01	4 kph	128° true
Trackpoint	N51 12.235 E16 59.934	109 m			1 m	00:00:01	4 kph	129° true
Trackpoint	N51 12.235 E16 59.934	109 m			1 m	00:00:01	3 kph	130° true
Trackpoint	N51 12.234 E16 59.935	109 m			1 m	00:00:01	3 kph	133° true
Trackpoint	N51 12.234 E16 59.935	109 m			1 m	00:00:01	4 kph	137° true
Trackpoint	N51 12.233 E16 59.936	109 m			1 m	00:00:01	4 kph	141° true
Trackpoint	N51 12.233 E16 59.936	109 m			1 m	00:00:01	4 kph	147° true
Trackpoint	N51 12.232 E16 59.937	109 m			1 m	00:00:01	3 kph	151° true
Trackpoint	N51 12.232 E16 59.937	109 m			1 m	00:00:01	3 kph	151° true
Trackpoint	N51 12.232 E16 59.937	109 m			1 m	00:00:01	3 kph	156° true
Trackpoint	N51 12.231 E16 59.938	109 m			1 m	00:00:01	3 kph	157° true
Trackpoint	N51 12.231 E16 59.938	109 m			1 m	00:00:01	3 kph	160° true
Trackpoint	N51 12.230 E16 59.938	109 m			1 m	00:00:01	3 kph	164° true
Trackpoint	N51 12.230 E16 59.938	109 m			1 m	00:00:01	3 kph	170° true
Trackpoint	N51 12.229 E16 59.938	109 m			1 m	00:00:01	3 kph	174° true
Trackpoint	N51 12.229 E16 59.939	109 m			1 m	00:00:01	3 kph	173° true
Trackpoint	N51 12.228 E16 59.939	109 m			1 m	00:00:01	4 kph	176° true
Trackpoint	N51 12.228 E16 59.939	109 m			1 m	00:00:01	4 kph	176° true
Trackpoint	N51 12.227 E16 59.939	110 m			1 m	00:00:01	3 kph	174° true
Trackpoint	N51 12.227 E16 59.939	109 m			1 m	00:00:01	3 kph	178° true
Trackpoint	N51 12.226 E16 59.939	109 m			1 m	00:00:01	3 kph	178° true
Trackpoint	N51 12.226 E16 59.939	109 m			1 m	00:00:01	3 kph	178° true
Trackpoint	N51 12.225 E16 59.939	109 m			1 m	00:00:01	3 kph	183° true
Trackpoint	N51 12.225 E16 59.939	110 m			1 m	00:00:01	3 kph	186° true
Trackpoint	N51 12.224 E16 59.939	109 m			1 m	00:00:01	4 kph	185° true
Trackpoint	N51 12.223 E16 59.939	110 m			1 m	00:00:01	4 kph	184° true
Trackpoint	N51 12.223 E16 59.939	109 m			1 m	00:00:01	3 kph	185° true
Trackpoint	N51 12.222 E16 59.938	110 m			1 m	00:00:01	3 kph	187° true
Trackpoint	N51 12.222 E16 59.938	109 m			1 m	00:00:01	4 kph	191° true
Trackpoint	N51 12.221 E16 59.938	110 m			1 m	00:00:01	4 kph	190° true
Trackpoint	N51 12.221 E16 59.938	110 m			1 m	00:00:01	4 kph	188° true
Trackpoint	N51 12.220 E16 59.938	110 m			1 m	00:00:01	4 kph	189° true
Trackpoint	N51 12.220 E16 59.938	109 m			1 m	00:00:01	3 kph	195° true
Trackpoint	N51 12.219 E16 59.937	110 m			1 m	00:00:01	4 kph	202° true
Trackpoint	N51 12.219 E16 59.937	110 m			1 m	00:00:01	4 kph	203° true
Trackpoint	N51 12.218 E16 59.937	110 m			1 m	00:00:01	4 kph	201° true
Trackpoint	N51 12.218 E16 59.936	109 m			1 m	00:00:01	3 kph	195° true
Trackpoint	N51 12.217 E16 59.936	109 m			1 m	00:00:01	3 kph	195° true
Trackpoint	N51 12.217 E16 59.936	109 m			1 m	00:00:01	4 kph	200° true
Trackpoint	N51 12.216 E16 59.936	109 m			1 m	00:00:01	4 kph	199° true
Trackpoint	N51 12.216 E16 59.935	109 m			1 m	00:00:01	4 kph	200° true
Trackpoint	N51 12.215 E16 59.935	109 m			1 m	00:00:01	4 kph	201° true
Trackpoint	N51 12.215 E16 59.935	109 m			1 m	00:00:01	4 kph	202° true
Trackpoint	N51 12.214 E16 59.934	109 m			1 m	00:00:01	4 kph	208° true
Trackpoint	N51 12.214 E16 59.934	109 m			1 m	00:00:01	4 kph	208° true
Trackpoint	N51 12.213 E16 59.934	109 m			1 m	00:00:01	4 kph	205° true
Trackpoint	N51 12.213 E16 59.933	109 m			1 m	00:00:01	4 kph	206° true
Trackpoint	N51 12.212 E16 59.933	109 m			1 m	00:00:01	4 kph	209° true
Trackpoint	N51 12.212 E16 59.932	109 m			1 m	00:00:01	3 kph	213° true
Trackpoint	N51 12.211 E16 59.932	109 m			1 m	00:00:01	3 kph	215° true
Trackpoint	N51 12.211 E16 59.931	109 m			1 m	00:00:01	3 kph	214° true
Trackpoint	N51 12.211 E16 59.931	109 m			1 m	00:00:01	3 kph	213° true
Trackpoint	N51 12.210 E16 59.931	109 m			1 m	00:00:01	3 kph	214° true
Trackpoint	N51 12.210 E16 59.930	109 m			1 m	00:00:01	3 kph	217° true
Trackpoint	N51 12.209 E16 59.930	109 m			1 m	00:00:01	3 kph	217° true
Trackpoint	N51 12.209 E16 59.929	109 m			1 m	00:00:01	3 kph	222° true
Trackpoint	N51 12.209 E16 59.928	109 m			1 m	00:00:01	3 kph	223° true
Trackpoint	N51 12.208 E16 59.928	109 m			1 m	00:00:01	3 kph	224° true
Trackpoint	N51 12.208 E16 59.928	109 m			1 m	00:00:01	3 kph	225° true
Trackpoint	N51 12.208 E16 59.927	109 m			1 m	00:00:01	3 kph	226° true
Trackpoint	N51 12.207 E16 59.926	109 m			1 m	00:00:01	3 kph	231° true
Trackpoint	N51 12.207 E16 59.926	110 m			1 m	00:00:01	3 kph	233° true
Trackpoint	N51 12.207 E16 59.925	110 m			1 m	00:00:01	3 kph	234° true
Trackpoint	N51 12.207 E16 59.924	109 m			1 m	00:00:01	3 kph	237° true
Trackpoint	N51 12.206 E16 59.924	110 m			1 m	00:00:01	3 kph	242° true
Trackpoint	N51 12.206 E16 59.923	109 m			1 m	00:00:01	3 kph	244° true
Trackpoint	N51 12.206 E16 59.922	109 m			1 m	00:00:01	3 kph	242° true
Trackpoint	N51 12.206 E16 59.922	109 m			1 m	00:00:01	3 kph	241° true
Trackpoint	N51 12.205 E16 59.921	109 m			1 m	00:00:01	3 kph	242° true
Trackpoint	N51 12.205 E16 59.920	109 m			1 m	00:00:01	3 kph	246° true
Trackpoint	N51 12.205 E16 59.920	109 m			1 m	00:00:01	3 kph	249° true
Trackpoint	N51 12.205 E16 59.919	109 m			1 m	00:00:01	3 kph	251° true
Trackpoint	N51 12.205 E16 59.918	109 m			1 m	00:00:01	3 kph	253° true
Trackpoint	N51 12.205 E16 59.917	109 m			1 m	00:00:01	3 kph	256° true
Trackpoint	N51 12.205 E16 59.917	109 m			1 m	00:00:01	3 kph	258° true
Trackpoint	N51 12.205 E16 59.916	109 m			1 m	00:00:01	3 kph	259° true
Trackpoint	N51 12.204 E16 59.915	109 m			1 m	00:00:01	3 kph	264° true
Trackpoint	N51 12.204 E16 59.914	109 m			1 m	00:00:01	3 kph	271° true
Trackpoint	N51 12.204 E16 59.913	109 m			1 m	00:00:01	3 kph	273° true
Trackpoint	N51 12.205 E16 59.913	109 m			1 m	00:00:01	3 kph	274° true
Trackpoint	N51 12.205 E16 59.912	109 m			1 m	00:00:01	3 kph	275° true
Trackpoint	N51 12.205 E16 59.911	109 m			1 m	00:00:01	3 kph	279° true
Trackpoint	N51 12.205 E16 59.910	109 m			1 m	00:00:01	3 kph	277° true
Trackpoint	N51 12.205 E16 59.910	109 m			1 m	00:00:01	3 kph	279° true
Trackpoint	N51 12.205 E16 59.909	109 m			1 m	00:00:01	3 kph	285° true
Trackpoint	N51 12.205 E16 59.908	109 m			1 m	00:00:01	3 kph	284° true
Trackpoint	N51 12.205 E16 59.907	109 m			1 m	00:00:01	3 kph	284° true
Trackpoint	N51 12.205 E16 59.907	109 m			1 m	00:00:01	3 kph	291° true
Trackpoint	N51 12.205 E16 59.906	108 m			1 m	00:00:01	3 kph	301° true
Trackpoint	N51 12.206 E16 59.905	109 m			1 m	00:00:01	3 kph	302° true
Trackpoint	N51 12.206 E16 59.905	109 m			1 m	00:00:01	3 kph	300° true
Trackpoint	N51 12.206 E16 59.904	109 m			1 m	00:00:01	3 kph	302° true
Trackpoint	N51 12.207 E16 59.904	109 m			1 m	00:00:01	3 kph	306° true
Trackpoint	N51 12.207 E16 59.903	109 m			1 m	00:00:01	3 kph	307° true
Trackpoint	N51 12.207 E16 59.902	109 m			1 m	00:00:01	3 kph	310° true
Trackpoint	N51 12.208 E16 59.902	109 m			1 m	00:00:01	3 kph	314° true
Trackpoint	N51 12.208 E16 59.901	109 m			1 m	00:00:01	3 kph	318° true
Trackpoint	N51 12.208 E16 59.901	109 m			1 m	00:00:01	3 kph	317° true
Trackpoint	N51 12.209 E16 59.900	109 m			1 m	00:00:01	3 kph	318° true
Trackpoint	N51 12.209 E16 59.900	109 m			1 m	00:00:01	3 kph	322° true
Trackpoint	N51 12.209 E16 59.899	109 m			1 m	00:00:01	3 kph	326° true
Trackpoint	N51 12.210 E16 59.899	109 m			1 m	00:00:01	3 kph	330° true
Trackpoint	N51 12.210 E16 59.898	109 m			1 m	00:00:01	3 kph	330° true
Trackpoint	N51 12.211 E16 59.898	109 m			1 m	00:00:01	3 kph	332° true
Trackpoint	N51 12.211 E16 59.898	109 m			1 m	00:00:01	3 kph	329° true
Trackpoint	N51 12.211 E16 59.897	109 m			1 m	00:00:01	3 kph	326° true
Trackpoint	N51 12.212 E16 59.897	109 m			1 m	00:00:01	3 kph	333° true
Trackpoint	N51 12.212 E16 59.897	109 m			1 m	00:00:01	3 kph	340° true
Trackpoint	N51 12.213 E16 59.896	109 m			1 m	00:00:01	3 kph	338° true
Trackpoint	N51 12.213 E16 59.896	109 m			1 m	00:00:01	3 kph	339° true
Trackpoint	N51 12.214 E16 59.896	109 m			1 m	00:00:01	3 kph	342° true
Trackpoint	N51 12.214 E16 59.896	110 m			1 m	00:00:01	3 kph	346° true
Trackpoint	N51 12.215 E16 59.896	109 m			1 m	00:00:01	3 kph	352° true
Trackpoint	N51 12.215 E16 59.896	109 m			1 m	00:00:01	3 kph	357° true
Trackpoint	N51 12.216 E16 59.896	109 m			1 m	00:00:01	3 kph	0° true
Trackpoint	N51 12.216 E16 59.896	109 m			1 m	00:00:01	3 kph	357° true
Trackpoint	N51 12.216 E16 59.896	109 m			1 m	00:00:01	3 kph	0° true
Trackpoint	N51 12.217 E16 59.896	109 m			1 m	00:00:01	3 kph	6° true
Trackpoint	N51 12.217 E16 59.896	109 m			1 m	00:00:01	3 kph	4° true
Trackpoint	N51 12.218 E16 59.896	109 m			1 m	00:00:01	3 kph	6° true
Trackpoint	N51 12.218 E16 59.896	109 m			1 m	00:00:01	3 kph	9° true
Trackpoint	N51 12.219 E16 59.896	109 m			1 m	00:00:01	3 kph	11° true
Trackpoint	N51 12.219 E16 59.896	109 m			1 m	00:00:01	3 kph	15° true
Trackpoint	N51 12.220 E16 59.896	110 m			1 m	00:00:01	3 kph	12° true
Trackpoint	N51 12.220 E16 59.897	109 m			1 m	00:00:01	3 kph	14° true
Trackpoint	N51 12.220 E16 59.897	110 m			1 m	00:00:01	3 kph	16° true
Trackpoint	N51 12.221 E16 59.897	109 m			1 m	00:00:01	3 kph	13° true
Trackpoint	N51 12.221 E16 59.897	109 m			1 m	00:00:01	3 kph	8° true
Trackpoint	N51 12.222 E16 59.897	110 m			1 m	00:00:01	3 kph	9° true
Trackpoint	N51 12.222 E16 59.897	110 m			1 m	00:00:01	3 kph	15° true
Trackpoint	N51 12.223 E16 59.897	110 m			1 m	00:00:01	3 kph	13° true
Trackpoint	N51 12.223 E16 59.898	110 m			1 m	00:00:01	3 kph	18° true
Trackpoint	N51 12.224 E16 59.898	110 m			1 m	00:00:01	3 kph	28° true
Trackpoint	N51 12.224 E16 59.898	109 m			1 m	00:00:01	3 kph	35° true
Trackpoint	N51 12.224 E16 59.899	110 m			1 m	00:00:01	3 kph	36° true
Trackpoint	N51 12.225 E16 59.899	110 m			1 m	00:00:01	3 kph	39° true
Trackpoint	N51 12.225 E16 59.900	110 m			1 m	00:00:01	3 kph	46° true
Trackpoint	N51 12.225 E16 59.900	110 m			1 m	00:00:01	3 kph	50° true
Trackpoint	N51 12.226 E16 59.901	110 m			1 m	00:00:01	3 kph	51° true
Trackpoint	N51 12.226 E16 59.902	110 m			1 m	00:00:01	3 kph	55° true
Trackpoint	N51 12.226 E16 59.902	110 m			1 m	00:00:01	3 kph	59° true
Trackpoint	N51 12.226 E16 59.903	110 m			1 m	00:00:01	3 kph	57° true
Trackpoint	N51 12.227 E16 59.904	110 m			1 m	00:00:01	3 kph	57° true
Trackpoint	N51 12.227 E16 59.904	111 m			1 m	00:00:01	3 kph	60° true
Trackpoint	N51 12.227 E16 59.905	110 m			1 m	00:00:01	3 kph	61° true
Trackpoint	N51 12.227 E16 59.905	110 m			1 m	00:00:01	3 kph	62° true
Trackpoint	N51 12.227 E16 59.906	111 m			1 m	00:00:01	3 kph	68° true
Trackpoint	N51 12.227 E16 59.907	110 m			1 m	00:00:01	3 kph	79° true
Trackpoint	N51 12.228 E16 59.907	110 m			1 m	00:00:01	3 kph	85° true
Trackpoint	N51 12.228 E16 59.908	110 m			1 m	00:00:01	3 kph	89° true
Trackpoint	N51 12.227 E16 59.909	110 m			1 m	00:00:01	3 kph	95° true
Trackpoint	N51 12.227 E16 59.910	110 m			1 m	00:00:01	3 kph	100° true
Trackpoint	N51 12.227 E16 59.910	110 m			1 m	00:00:01	3 kph	107° true
Trackpoint	N51 12.227 E16 59.911	110 m			1 m	00:00:01	2 kph	118° true
Trackpoint	N51 12.227 E16 59.911	110 m			1 m	00:00:01	3 kph	117° true
Trackpoint	N51 12.227 E16 59.912	110 m			1 m	00:00:01	3 kph	115° true
Trackpoint	N51 12.227 E16 59.912	110 m			1 m	00:00:01	3 kph	120° true
Trackpoint	N51 12.226 E16 59.913	110 m			1 m	00:00:01	3 kph	128° true
Trackpoint	N51 12.226 E16 59.914	110 m			1 m	00:00:01	3 kph	130° true
Trackpoint	N51 12.226 E16 59.914	110 m			1 m	00:00:01	3 kph	132° true
Trackpoint	N51 12.225 E16 59.915	110 m			1 m	00:00:01	3 kph	138° true
Trackpoint	N51 12.225 E16 59.915	110 m			1 m	00:00:01	3 kph	144° true
Trackpoint	N51 12.225 E16 59.915	110 m			1 m	00:00:01	3 kph	148° true
Trackpoint	N51 12.224 E16 59.916	110 m			1 m	00:00:01	3 kph	152° true
Trackpoint	N51 12.224 E16 59.916	110 m			1 m	00:00:01	3 kph	154° true
Trackpoint	N51 12.223 E16 59.916	110 m			1 m	00:00:01	3 kph	154° true
Trackpoint	N51 12.223 E16 59.917	110 m			1 m	00:00:01	3 kph	158° true
Trackpoint	N51 12.223 E16 59.917	110 m			1 m	00:00:01	3 kph	162° true
Trackpoint	N51 12.222 E16 59.917	111 m			1 m	00:00:01	3 kph	161° true
Trackpoint	N51 12.222 E16 59.917	111 m			1 m	00:00:01	3 kph	166° true
Trackpoint	N51 12.221 E16 59.917	110 m			1 m	00:00:01	3 kph	176° true
Trackpoint	N51 12.221 E16 59.917	110 m			1 m	00:00:01	3 kph	179° true
Trackpoint	N51 12.220 E16 59.917	111 m			1 m	00:00:01	3 kph	182° true
Trackpoint	N51 12.220 E16 59.917	110 m			1 m	00:00:01	3 kph	189° true
Trackpoint	N51 12.219 E16 59.917	110 m			1 m	00:00:01	3 kph	196° true
Trackpoint	N51 12.219 E16 59.917	110 m			1 m	00:00:01	3 kph	199° true
Trackpoint	N51 12.219 E16 59.916	110 m			1 m	00:00:01	3 kph	206° true
Trackpoint	N51 12.218 E16 59.916	110 m			1 m	00:00:01	3 kph	211° true
Trackpoint	N51 12.218 E16 59.916	110 m			1 m	00:00:01	3 kph	214° true
Trackpoint	N51 12.218 E16 59.915	111 m			1 m	00:00:01	3 kph	218° true
Trackpoint	N51 12.217 E16 59.915	110 m			1 m	00:00:01	3 kph	223° true
Trackpoint	N51 12.217 E16 59.914	110 m			1 m	00:00:01	3 kph	226° true
Trackpoint	N51 12.217 E16 59.914	110 m			1 m	00:00:01	3 kph	236° true
Trackpoint	N51 12.217 E16 59.913	110 m			1 m	00:00:01	3 kph	243° true
Trackpoint	N51 12.216 E16 59.913	110 m			1 m	00:00:01	3 kph	245° true
Trackpoint	N51 12.216 E16 59.912	110 m			1 m	00:00:01	2 kph	248° true
Trackpoint	N51 12.216 E16 59.912	110 m			1 m	00:00:01	2 kph	256° true
Trackpoint	N51 12.216 E16 59.911	110 m			1 m	00:00:01	3 kph	265° true
Trackpoint	N51 12.216 E16 59.910	110 m			1 m	00:00:01	2 kph	272° true
Trackpoint	N51 12.216 E16 59.910	110 m			1 m	00:00:01	2 kph	274° true
Trackpoint	N51 12.216 E16 59.909	110 m			1 m	00:00:01	2 kph	280° true
Trackpoint	N51 12.216 E16 59.909	110 m			1 m	00:00:01	2 kph	293° true
Trackpoint	N51 12.217 E16 59.908	110 m			1 m	00:00:01	3 kph	297° true
Trackpoint	N51 12.217 E16 59.908	110 m			1 m	00:00:01	3 kph	300° true
Trackpoint	N51 12.217 E16 59.907	110 m			1 m	00:00:01	3 kph	311° true
Trackpoint	N51 12.217 E16 59.907	110 m			1 m	00:00:01	3 kph	321° true
Trackpoint	N51 12.218 E16 59.906	110 m			1 m	00:00:01	3 kph	315° true
Trackpoint	N51 12.218 E16 59.906	110 m			1 m	00:00:01	2 kph	319° true
Trackpoint	N51 12.218 E16 59.906	110 m			1 m	00:00:01	3 kph	324° true
Trackpoint	N51 12.219 E16 59.905	110 m			1 m	00:00:01	3 kph	330° true
Trackpoint	N51 12.219 E16 59.905	110 m			1 m	00:00:01	2 kph	336° true
Trackpoint	N51 12.219 E16 59.905	110 m			1 m	00:00:01	3 kph	337° true
Trackpoint	N51 12.220 E16 59.905	111 m			1 m	00:00:01	3 kph	340° true
Trackpoint	N51 12.220 E16 59.904	111 m			1 m	00:00:01	3 kph	347° true
Trackpoint	N51 12.221 E16 59.904	110 m			1 m	00:00:02	3 kph	357° true
Trackpoint	N51 12.221 E16 59.904	110 m			1 m	00:00:01	3 kph	352° true
Trackpoint	N51 12.222 E16 59.904	110 m			1 m	00:00:01	3 kph	358° true
Trackpoint	N51 12.222 E16 59.904	110 m			1 m	00:00:01	3 kph	2° true
Trackpoint	N51 12.223 E16 59.904	110 m			1 m	00:00:01	3 kph	13° true
Trackpoint	N51 12.223 E16 59.905	110 m			1 m	00:00:01	3 kph	23° true
Trackpoint	N51 12.223 E16 59.905	110 m			1 m	00:00:01	3 kph	22° true
Trackpoint	N51 12.224 E16 59.905	111 m			1 m	00:00:01	3 kph	22° true
Trackpoint	N51 12.224 E16 59.905	111 m			1 m	00:00:01	3 kph	29° true
Trackpoint	N51 12.224 E16 59.906	110 m			1 m	00:00:01	3 kph	32° true
Trackpoint	N51 12.225 E16 59.906	110 m			1 m	00:00:01	3 kph	32° true
Trackpoint	N51 12.225 E16 59.906	110 m			1 m	00:00:01	2 kph	39° true
Trackpoint	N51 12.225 E16 59.907	110 m			1 m	00:00:01	3 kph	48° true
Trackpoint	N51 12.226 E16 59.908	110 m			1 m	00:00:01	3 kph	47° true
Trackpoint	N51 12.226 E16 59.908	110 m			1 m	00:00:01	3 kph	52° true
Trackpoint	N51 12.226 E16 59.909	110 m			1 m	00:00:01	3 kph	62° true
Trackpoint	N51 12.226 E16 59.909	110 m			1 m	00:00:01	3 kph	64° true
Trackpoint	N51 12.226 E16 59.910	111 m			1 m	00:00:01	3 kph	68° true
Trackpoint	N51 12.227 E16 59.911	110 m			1 m	00:00:01	3 kph	75° true
Trackpoint	N51 12.227 E16 59.912	111 m			1 m	00:00:01	3 kph	79° true
Trackpoint	N51 12.227 E16 59.912	110 m			1 m	00:00:01	3 kph	77° true
Trackpoint	N51 12.227 E16 59.913	110 m			1 m	00:00:01	3 kph	81° true
Trackpoint	N51 12.227 E16 59.914	110 m			1 m	00:00:01	3 kph	93° true
Trackpoint	N51 12.227 E16 59.914	111 m			1 m	00:00:01	3 kph	96° true
Trackpoint	N51 12.227 E16 59.915	110 m			1 m	00:00:01	3 kph	97° true
Trackpoint	N51 12.227 E16 59.916	111 m			1 m	00:00:01	3 kph	102° true
Trackpoint	N51 12.226 E16 59.916	111 m			1 m	00:00:01	3 kph	111° true
Trackpoint	N51 12.226 E16 59.917	111 m			1 m	00:00:01	3 kph	114° true
Trackpoint	N51 12.226 E16 59.918	111 m			1 m	00:00:01	3 kph	117° true
Trackpoint	N51 12.226 E16 59.918	111 m			1 m	00:00:01	3 kph	123° true
Trackpoint	N51 12.225 E16 59.919	111 m			1 m	00:00:01	3 kph	128° true
Trackpoint	N51 12.225 E16 59.920	111 m			1 m	00:00:01	3 kph	126° true
Trackpoint	N51 12.225 E16 59.920	111 m			1 m	00:00:01	3 kph	126° true
Trackpoint	N51 12.225 E16 59.921	110 m			1 m	00:00:01	3 kph	131° true
Trackpoint	N51 12.224 E16 59.921	111 m			1 m	00:00:01	3 kph	137° true
Trackpoint	N51 12.224 E16 59.922	111 m			1 m	00:00:01	3 kph	143° true
Trackpoint	N51 12.224 E16 59.922	110 m			1 m	00:00:01	3 kph	150° true
Trackpoint	N51 12.223 E16 59.922	111 m			1 m	00:00:01	3 kph	152° true
Trackpoint	N51 12.223 E16 59.923	111 m			1 m	00:00:01	3 kph	151° true
Trackpoint	N51 12.222 E16 59.923	111 m			1 m	00:00:01	3 kph	157° true
Trackpoint	N51 12.222 E16 59.923	111 m			1 m	00:00:01	3 kph	164° true
Trackpoint	N51 12.222 E16 59.923	111 m			1 m	00:00:01	3 kph	166° true
Trackpoint	N51 12.221 E16 59.923	111 m			1 m	00:00:01	3 kph	166° true
Trackpoint	N51 12.221 E16 59.923	111 m			1 m	00:00:01	3 kph	172° true
Trackpoint	N51 12.220 E16 59.924	111 m			1 m	00:00:01	3 kph	173° true
Trackpoint	N51 12.220 E16 59.924	111 m			1 m	00:00:01	3 kph	171° true
Trackpoint	N51 12.220 E16 59.924	111 m			1 m	00:00:01	3 kph	177° true
Trackpoint	N51 12.219 E16 59.924	111 m			1 m	00:00:01	3 kph	180° true
Trackpoint	N51 12.219 E16 59.924	111 m			1 m	00:00:01	3 kph	178° true
Trackpoint	N51 12.218 E16 59.924	111 m			1 m	00:00:01	2 kph	185° true
Trackpoint	N51 12.218 E16 59.923	111 m			1 m	00:00:01	3 kph	191° true
Trackpoint	N51 12.217 E16 59.923	111 m			1 m	00:00:01	3 kph	193° true
Trackpoint	N51 12.217 E16 59.923	111 m			1 m	00:00:01	3 kph	198° true
Trackpoint	N51 12.217 E16 59.923	111 m			1 m	00:00:01	3 kph	199° true
Trackpoint	N51 12.216 E16 59.923	111 m			1 m	00:00:01	3 kph	197° true
Trackpoint	N51 12.216 E16 59.922	111 m			1 m	00:00:01	2 kph	203° true
Trackpoint	N51 12.216 E16 59.922	110 m			1 m	00:00:01	2 kph	208° true
Trackpoint	N51 12.215 E16 59.922	111 m			1 m	00:00:01	2 kph	210° true

## Sheet: Walking 2
Grid	Szer./dł. hddd°mm.mmm'
Datum	WGS 84
Header	Name	Elapsed Time	Length	Average Speed
Track	Foot-O-W5 (walking 2)	00:04:56	250 m	3 kph
Header	Position	Altitude	Depth	Temperature	Leg Length	Leg Time	Leg Speed	Leg Course
Trackpoint	N51 12.214 E16 59.921	110 m			1 m	00:00:01	2 kph	237° true
Trackpoint	N51 12.214 E16 59.920	110 m			1 m	00:00:01	4 kph	236° true
Trackpoint	N51 12.213 E16 59.919	110 m			1 m	00:00:01	4 kph	232° true
Trackpoint	N51 12.213 E16 59.918	110 m			1 m	00:00:01	4 kph	231° true
Trackpoint	N51 12.213 E16 59.918	110 m			1 m	00:00:01	4 kph	230° true
Trackpoint	N51 12.212 E16 59.917	110 m			1 m	00:00:01	4 kph	233° true
Trackpoint	N51 12.212 E16 59.916	110 m			1 m	00:00:01	4 kph	237° true
Trackpoint	N51 12.212 E16 59.915	111 m			1 m	00:00:01	4 kph	240° true
Trackpoint	N51 12.211 E16 59.915	110 m			1 m	00:00:01	3 kph	239° true
Trackpoint	N51 12.211 E16 59.914	110 m			1 m	00:00:01	3 kph	242° true
Trackpoint	N51 12.211 E16 59.913	111 m			1 m	00:00:01	3 kph	243° true
Trackpoint	N51 12.211 E16 59.913	110 m			1 m	00:00:01	3 kph	240° true
Trackpoint	N51 12.211 E16 59.912	110 m			1 m	00:00:01	3 kph	243° true
Trackpoint	N51 12.210 E16 59.912	110 m			1 m	00:00:01	3 kph	247° true
Trackpoint	N51 12.210 E16 59.911	110 m			1 m	00:00:01	3 kph	248° true
Trackpoint	N51 12.210 E16 59.910	110 m			1 m	00:00:01	3 kph	250° true
Trackpoint	N51 12.210 E16 59.910	110 m			1 m	00:00:01	3 kph	252° true
Trackpoint	N51 12.210 E16 59.909	110 m			1 m	00:00:01	3 kph	259° true
Trackpoint	N51 12.210 E16 59.908	110 m			1 m	00:00:01	3 kph	262° true
Trackpoint	N51 12.210 E16 59.907	110 m			1 m	00:00:01	3 kph	269° true
Trackpoint	N51 12.210 E16 59.907	110 m			1 m	00:00:01	3 kph	273° true
Trackpoint	N51 12.210 E16 59.906	110 m			1 m	00:00:01	3 kph	275° true
Trackpoint	N51 12.210 E16 59.905	110 m			1 m	00:00:01	3 kph	280° true
Trackpoint	N51 12.210 E16 59.905	110 m			1 m	00:00:01	3 kph	283° true
Trackpoint	N51 12.210 E16 59.904	110 m			1 m	00:00:01	3 kph	281° true
Trackpoint	N51 12.210 E16 59.903	110 m			1 m	00:00:01	3 kph	283° true
Trackpoint	N51 12.210 E16 59.902	110 m			1 m	00:00:01	3 kph	286° true
Trackpoint	N51 12.211 E16 59.902	111 m			1 m	00:00:01	3 kph	293° true
Trackpoint	N51 12.211 E16 59.901	110 m			1 m	00:00:01	3 kph	292° true
Trackpoint	N51 12.211 E16 59.900	110 m			1 m	00:00:01	3 kph	288° true
Trackpoint	N51 12.211 E16 59.900	110 m			1 m	00:00:01	3 kph	294° true
Trackpoint	N51 12.211 E16 59.899	110 m			1 m	00:00:01	3 kph	299° true
Trackpoint	N51 12.211 E16 59.898	110 m			1 m	00:00:01	3 kph	298° true
Trackpoint	N51 12.212 E16 59.898	110 m			1 m	00:00:01	3 kph	301° true
Trackpoint	N51 12.212 E16 59.897	110 m			1 m	00:00:01	3 kph	310° true
Trackpoint	N51 12.212 E16 59.897	110 m			1 m	00:00:01	3 kph	316° true
Trackpoint	N51 12.213 E16 59.896	110 m			1 m	00:00:01	3 kph	316° true
Trackpoint	N51 12.213 E16 59.896	111 m			1 m	00:00:01	3 kph	319° true
Trackpoint	N51 12.214 E16 59.895	110 m			1 m	00:00:01	3 kph	326° true
Trackpoint	N51 12.214 E16 59.895	110 m			1 m	00:00:01	4 kph	334° true
Trackpoint	N51 12.214 E16 59.894	111 m			1 m	00:00:01	3 kph	332° true
Trackpoint	N51 12.215 E16 59.894	110 m			1 m	00:00:01	3 kph	335° true
Trackpoint	N51 12.215 E16 59.894	111 m			1 m	00:00:01	3 kph	341° true
Trackpoint	N51 12.216 E16 59.894	110 m			1 m	00:00:01	3 kph	348° true
Trackpoint	N51 12.216 E16 59.894	110 m			1 m	00:00:01	3 kph	354° true
Trackpoint	N51 12.217 E16 59.893	111 m			1 m	00:00:01	3 kph	356° true
Trackpoint	N51 12.217 E16 59.893	111 m			1 m	00:00:01	3 kph	1° true
Trackpoint	N51 12.218 E16 59.894	110 m			1 m	00:00:01	4 kph	3° true
Trackpoint	N51 12.218 E16 59.894	111 m			1 m	00:00:01	3 kph	2° true
Trackpoint	N51 12.219 E16 59.894	110 m			1 m	00:00:01	3 kph	2° true
Trackpoint	N51 12.219 E16 59.894	111 m			1 m	00:00:01	3 kph	3° true
Trackpoint	N51 12.220 E16 59.894	111 m			1 m	00:00:01	3 kph	5° true
Trackpoint	N51 12.220 E16 59.894	111 m			1 m	00:00:01	3 kph	18° true
Trackpoint	N51 12.221 E16 59.894	111 m			1 m	00:00:01	3 kph	28° true
Trackpoint	N51 12.221 E16 59.895	111 m			1 m	00:00:01	3 kph	33° true
Trackpoint	N51 12.221 E16 59.895	111 m			1 m	00:00:01	3 kph	33° true
Trackpoint	N51 12.222 E16 59.896	111 m			1 m	00:00:01	3 kph	36° true
Trackpoint	N51 12.222 E16 59.896	111 m			1 m	00:00:01	3 kph	44° true
Trackpoint	N51 12.222 E16 59.897	111 m			1 m	00:00:01	3 kph	47° true
Trackpoint	N51 12.223 E16 59.897	111 m			1 m	00:00:01	3 kph	51° true
Trackpoint	N51 12.223 E16 59.898	111 m			1 m	00:00:01	3 kph	58° true
Trackpoint	N51 12.223 E16 59.898	111 m			1 m	00:00:01	3 kph	63° true
Trackpoint	N51 12.223 E16 59.899	111 m			1 m	00:00:01	3 kph	71° true
Trackpoint	N51 12.223 E16 59.900	111 m			1 m	00:00:01	3 kph	81° true
Trackpoint	N51 12.223 E16 59.900	111 m			1 m	00:00:01	3 kph	91° true
Trackpoint	N51 12.223 E16 59.901	111 m			1 m	00:00:01	3 kph	101° true
Trackpoint	N51 12.223 E16 59.902	111 m			1 m	00:00:01	3 kph	103° true
Trackpoint	N51 12.223 E16 59.903	111 m			1 m	00:00:01	3 kph	100° true
Trackpoint	N51 12.223 E16 59.903	111 m			1 m	00:00:01	3 kph	102° true
Trackpoint	N51 12.223 E16 59.904	111 m			1 m	00:00:01	3 kph	104° true
Trackpoint	N51 12.223 E16 59.905	111 m			1 m	00:00:01	3 kph	113° true
Trackpoint	N51 12.222 E16 59.905	111 m			1 m	00:00:01	3 kph	121° true
Trackpoint	N51 12.222 E16 59.906	111 m			1 m	00:00:01	3 kph	124° true
Trackpoint	N51 12.222 E16 59.907	111 m			1 m	00:00:01	3 kph	128° true
Trackpoint	N51 12.222 E16 59.907	111 m			1 m	00:00:01	3 kph	132° true
Trackpoint	N51 12.221 E16 59.908	111 m			1 m	00:00:01	3 kph	134° true
Trackpoint	N51 12.221 E16 59.908	111 m			1 m	00:00:01	3 kph	140° true
Trackpoint	N51 12.221 E16 59.909	111 m			1 m	00:00:01	3 kph	147° true
Trackpoint	N51 12.220 E16 59.909	111 m			1 m	00:00:01	3 kph	154° true
Trackpoint	N51 12.220 E16 59.909	111 m			1 m	00:00:01	3 kph	160° true
Trackpoint	N51 12.219 E16 59.909	111 m			1 m	00:00:01	4 kph	162° true
Trackpoint	N51 12.219 E16 59.910	111 m			1 m	00:00:01	3 kph	161° true
Trackpoint	N51 12.218 E16 59.910	111 m			1 m	00:00:01	3 kph	166° true
Trackpoint	N51 12.218 E16 59.910	111 m			1 m	00:00:01	3 kph	176° true
Trackpoint	N51 12.217 E16 59.910	111 m			1 m	00:00:01	3 kph	185° true
Trackpoint	N51 12.217 E16 59.910	111 m			1 m	00:00:01	3 kph	191° true
Trackpoint	N51 12.216 E16 59.910	111 m			1 m	00:00:01	3 kph	191° true
Trackpoint	N51 12.216 E16 59.909	111 m			1 m	00:00:01	3 kph	190° true
Trackpoint	N51 12.215 E16 59.909	111 m			1 m	00:00:01	3 kph	191° true
Trackpoint	N51 12.215 E16 59.909	111 m			1 m	00:00:01	3 kph	197° true
Trackpoint	N51 12.215 E16 59.909	110 m			1 m	00:00:01	3 kph	204° true
Trackpoint	N51 12.214 E16 59.908	111 m			1 m	00:00:01	3 kph	209° true
Trackpoint	N51 12.214 E16 59.908	111 m			1 m	00:00:01	3 kph	215° true
Trackpoint	N51 12.213 E16 59.908	111 m			1 m	00:00:01	3 kph	222° true
Trackpoint	N51 12.213 E16 59.907	111 m			1 m	00:00:01	3 kph	230° true
Trackpoint	N51 12.213 E16 59.906	111 m			1 m	00:00:01	3 kph	238° true
Trackpoint	N51 12.213 E16 59.906	111 m			1 m	00:00:01	3 kph	234° true
Trackpoint	N51 12.212 E16 59.905	111 m			1 m	00:00:01	3 kph	231° true
Trackpoint	N51 12.212 E16 59.905	111 m			1 m	00:00:01	3 kph	242° true
Trackpoint	N51 12.212 E16 59.904	111 m			1 m	00:00:01	3 kph	247° true
Trackpoint	N51 12.212 E16 59.903	111 m			1 m	00:00:01	3 kph	252° true
Trackpoint	N51 12.212 E16 59.903	110 m			1 m	00:00:01	3 kph	257° true
Trackpoint	N51 12.212 E16 59.902	111 m			1 m	00:00:01	3 kph	259° true
Trackpoint	N51 12.212 E16 59.901	111 m			1 m	00:00:01	3 kph	259° true
Trackpoint	N51 12.211 E16 59.900	111 m			1 m	00:00:01	3 kph	256° true
Trackpoint	N51 12.211 E16 59.900	111 m			1 m	00:00:01	3 kph	259° true
Trackpoint	N51 12.211 E16 59.899	111 m			1 m	00:00:01	3 kph	269° true
Trackpoint	N51 12.211 E16 59.898	111 m			1 m	00:00:01	3 kph	274° true
Trackpoint	N51 12.211 E16 59.898	111 m			1 m	00:00:01	3 kph	278° true
Trackpoint	N51 12.212 E16 59.897	111 m			1 m	00:00:01	3 kph	283° true
Trackpoint	N51 12.212 E16 59.896	111 m			1 m	00:00:01	3 kph	285° true
Trackpoint	N51 12.212 E16 59.895	110 m			1 m	00:00:01	3 kph	280° true
Trackpoint	N51 12.212 E16 59.895	111 m			1 m	00:00:01	3 kph	276° true
Trackpoint	N51 12.212 E16 59.894	111 m			1 m	00:00:01	3 kph	285° true
Trackpoint	N51 12.212 E16 59.893	111 m			1 m	00:00:01	3 kph	289° true
Trackpoint	N51 12.212 E16 59.893	111 m			1 m	00:00:01	3 kph	294° true
Trackpoint	N51 12.212 E16 59.892	111 m			1 m	00:00:01	3 kph	302° true
Trackpoint	N51 12.213 E16 59.891	111 m			1 m	00:00:01	3 kph	306° true
Trackpoint	N51 12.213 E16 59.891	111 m			1 m	00:00:01	3 kph	307° true
Trackpoint	N51 12.213 E16 59.890	111 m			1 m	00:00:01	3 kph	315° true
Trackpoint	N51 12.214 E16 59.890	111 m			1 m	00:00:01	3 kph	321° true
Trackpoint	N51 12.214 E16 59.889	111 m			1 m	00:00:01	3 kph	326° true
Trackpoint	N51 12.215 E16 59.889	111 m			1 m	00:00:01	3 kph	326° true
Trackpoint	N51 12.215 E16 59.888	111 m			1 m	00:00:01	3 kph	326° true
Trackpoint	N51 12.215 E16 59.888	111 m			1 m	00:00:01	3 kph	330° true
Trackpoint	N51 12.216 E16 59.888	111 m			1 m	00:00:01	3 kph	328° true
Trackpoint	N51 12.216 E16 59.887	111 m			1 m	00:00:01	3 kph	329° true
Trackpoint	N51 12.217 E16 59.887	111 m			1 m	00:00:01	3 kph	338° true
Trackpoint	N51 12.217 E16 59.887	111 m			1 m	00:00:01	3 kph	342° true
Trackpoint	N51 12.218 E16 59.887	111 m			1 m	00:00:01	4 kph	348° true
Trackpoint	N51 12.218 E16 59.886	111 m			1 m	00:00:01	3 kph	351° true
Trackpoint	N51 12.219 E16 59.886	111 m			1 m	00:00:01	4 kph	351° true
Trackpoint	N51 12.219 E16 59.886	111 m			1 m	00:00:01	4 kph	348° true
Trackpoint	N51 12.220 E16 59.886	111 m			1 m	00:00:01	3 kph	350° true
Trackpoint	N51 12.220 E16 59.886	111 m			1 m	00:00:01	3 kph	355° true
Trackpoint	N51 12.221 E16 59.886	111 m			1 m	00:00:01	3 kph	358° true
Trackpoint	N51 12.221 E16 59.886	112 m			1 m	00:00:01	3 kph	0° true
Trackpoint	N51 12.221 E16 59.886	111 m			1 m	00:00:01	3 kph	4° true
Trackpoint	N51 12.222 E16 59.886	111 m			1 m	00:00:01	3 kph	3° true
Trackpoint	N51 12.222 E16 59.886	111 m			1 m	00:00:01	3 kph	3° true
Trackpoint	N51 12.223 E16 59.886	111 m			1 m	00:00:01	3 kph	9° true
Trackpoint	N51 12.223 E16 59.886	111 m			1 m	00:00:01	3 kph	18° true
Trackpoint	N51 12.224 E16 59.887	111 m			1 m	00:00:01	3 kph	20° true
Trackpoint	N51 12.224 E16 59.887	111 m			1 m	00:00:01	3 kph	23° true
Trackpoint	N51 12.224 E16 59.887	111 m			1 m	00:00:01	3 kph	31° true
Trackpoint	N51 12.225 E16 59.888	112 m			1 m	00:00:01	3 kph	39° true
Trackpoint	N51 12.225 E16 59.888	111 m			1 m	00:00:01	3 kph	39° true
Trackpoint	N51 12.225 E16 59.889	111 m			1 m	00:00:01	3 kph	40° true
Trackpoint	N51 12.226 E16 59.889	111 m			1 m	00:00:01	3 kph	44° true
Trackpoint	N51 12.226 E16 59.890	111 m			1 m	00:00:01	3 kph	51° true
Trackpoint	N51 12.226 E16 59.890	111 m			1 m	00:00:01	3 kph	48° true
Trackpoint	N51 12.227 E16 59.891	111 m			1 m	00:00:01	3 kph	51° true
Trackpoint	N51 12.227 E16 59.891	111 m			1 m	00:00:01	3 kph	63° true
Trackpoint	N51 12.227 E16 59.892	112 m			1 m	00:00:01	3 kph	74° true
Trackpoint	N51 12.227 E16 59.893	111 m			1 m	00:00:01	3 kph	79° true
Trackpoint	N51 12.227 E16 59.893	111 m			1 m	00:00:01	3 kph	84° true
Trackpoint	N51 12.227 E16 59.894	112 m			1 m	00:00:01	3 kph	89° true
Trackpoint	N51 12.227 E16 59.895	112 m			1 m	00:00:01	3 kph	97° true
Trackpoint	N51 12.227 E16 59.895	111 m			1 m	00:00:01	3 kph	101° true
Trackpoint	N51 12.227 E16 59.896	112 m			1 m	00:00:01	3 kph	106° true
Trackpoint	N51 12.227 E16 59.897	111 m			1 m	00:00:01	3 kph	111° true
Trackpoint	N51 12.226 E16 59.897	112 m			1 m	00:00:01	3 kph	115° true
Trackpoint	N51 12.226 E16 59.898	111 m			1 m	00:00:01	3 kph	117° true
Trackpoint	N51 12.226 E16 59.899	112 m			1 m	00:00:01	3 kph	127° true
Trackpoint	N51 12.226 E16 59.899	112 m			1 m	00:00:01	3 kph	130° true
Trackpoint	N51 12.225 E16 59.900	111 m			1 m	00:00:01	3 kph	134° true
Trackpoint	N51 12.225 E16 59.900	111 m			1 m	00:00:01	3 kph	140° true
Trackpoint	N51 12.225 E16 59.901	112 m			1 m	00:00:01	3 kph	145° true
Trackpoint	N51 12.224 E16 59.901	112 m			1 m	00:00:01	3 kph	149° true
Trackpoint	N51 12.224 E16 59.902	111 m			1 m	00:00:01	3 kph	152° true
Trackpoint	N51 12.223 E16 59.902	112 m			1 m	00:00:01	3 kph	158° true
Trackpoint	N51 12.223 E16 59.902	111 m			1 m	00:00:01	4 kph	161° true
Trackpoint	N51 12.222 E16 59.902	112 m			1 m	00:00:01	3 kph	163° true
Trackpoint	N51 12.222 E16 59.903	112 m			1 m	00:00:01	3 kph	166° true
Trackpoint	N51 12.221 E16 59.903	112 m			1 m	00:00:01	4 kph	176° true
Trackpoint	N51 12.221 E16 59.903	111 m			1 m	00:00:01	4 kph	179° true
Trackpoint	N51 12.220 E16 59.903	112 m			1 m	00:00:01	3 kph	185° true
Trackpoint	N51 12.220 E16 59.902	112 m			1 m	00:00:01	3 kph	195° true
Trackpoint	N51 12.219 E16 59.902	111 m			1 m	00:00:01	3 kph	201° true
Trackpoint	N51 12.219 E16 59.902	111 m			1 m	00:00:01	3 kph	201° true
Trackpoint	N51 12.219 E16 59.902	112 m			1 m	00:00:01	3 kph	206° true
Trackpoint	N51 12.218 E16 59.901	111 m			1 m	00:00:01	3 kph	216° true
Trackpoint	N51 12.218 E16 59.901	111 m			1 m	00:00:01	3 kph	217° true
Trackpoint	N51 12.217 E16 59.900	112 m			1 m	00:00:01	3 kph	223° true
Trackpoint	N51 12.217 E16 59.900	111 m			1 m	00:00:01	3 kph	227° true
Trackpoint	N51 12.217 E16 59.899	112 m			1 m	00:00:01	3 kph	237° true
Trackpoint	N51 12.217 E16 59.898	112 m			1 m	00:00:01	3 kph	242° true
Trackpoint	N51 12.216 E16 59.898	111 m			1 m	00:00:01	3 kph	247° true
Trackpoint	N51 12.216 E16 59.897	111 m			1 m	00:00:01	3 kph	251° true
Trackpoint	N51 12.216 E16 59.896	112 m			1 m	00:00:01	3 kph	256° true
Trackpoint	N51 12.216 E16 59.896	112 m			1 m	00:00:01	3 kph	259° true
Trackpoint	N51 12.216 E16 59.895	112 m			1 m	00:00:01	3 kph	261° true
Trackpoint	N51 12.216 E16 59.894	112 m			1 m	00:00:01	3 kph	267° true
Trackpoint	N51 12.216 E16 59.894	112 m			1 m	00:00:01	3 kph	273° true
Trackpoint	N51 12.216 E16 59.893	112 m			1 m	00:00:01	3 kph	275° true
Trackpoint	N51 12.216 E16 59.892	111 m			1 m	00:00:01	3 kph	280° true
Trackpoint	N51 12.216 E16 59.892	112 m			1 m	00:00:01	3 kph	285° true
Trackpoint	N51 12.216 E16 59.891	112 m			1 m	00:00:01	3 kph	289° true
Trackpoint	N51 12.217 E16 59.890	112 m			1 m	00:00:01	3 kph	293° true
Trackpoint	N51 12.217 E16 59.890	112 m			1 m	00:00:01	3 kph	305° true
Trackpoint	N51 12.217 E16 59.889	111 m			1 m	00:00:01	3 kph	312° true
Trackpoint	N51 12.217 E16 59.889	112 m			1 m	00:00:01	3 kph	311° true
Trackpoint	N51 12.218 E16 59.888	111 m			1 m	00:00:01	3 kph	309° true
Trackpoint	N51 12.218 E16 59.888	112 m			1 m	00:00:01	3 kph	307° true
Trackpoint	N51 12.218 E16 59.887	112 m			1 m	00:00:01	3 kph	302° true
Trackpoint	N51 12.218 E16 59.887	112 m			1 m	00:00:01	3 kph	304° true
Trackpoint	N51 12.219 E16 59.886	111 m			1 m	00:00:01	3 kph	311° true
Trackpoint	N51 12.219 E16 59.886	112 m			1 m	00:00:01	3 kph	321° true
Trackpoint	N51 12.219 E16 59.885	112 m			1 m	00:00:01	3 kph	328° true
Trackpoint	N51 12.220 E16 59.885	112 m			1 m	00:00:01	3 kph	328° true
Trackpoint	N51 12.220 E16 59.885	112 m			1 m	00:00:01	3 kph	336° true
Trackpoint	N51 12.220 E16 59.884	112 m			1 m	00:00:01	3 kph	341° true
Trackpoint	N51 12.221 E16 59.884	112 m			1 m	00:00:01	3 kph	342° true
Trackpoint	N51 12.221 E16 59.884	112 m			1 m	00:00:01	3 kph	348° true
Trackpoint	N51 12.222 E16 59.884	112 m			1 m	00:00:01	3 kph	359° true
Trackpoint	N51 12.222 E16 59.884	112 m			1 m	00:00:01	3 kph	6° true
Trackpoint	N51 12.223 E16 59.884	112 m			1 m	00:00:01	3 kph	7° true
Trackpoint	N51 12.223 E16 59.884	112 m			1 m	00:00:01	3 kph	12° true
Trackpoint	N51 12.224 E16 59.885	112 m			1 m	00:00:01	3 kph	18° true
Trackpoint	N51 12.224 E16 59.885	112 m			1 m	00:00:01	3 kph	16° true
Trackpoint	N51 12.224 E16 59.885	112 m			1 m	00:00:01	3 kph	13° true
Trackpoint	N51 12.225 E16 59.885	112 m			1 m	00:00:01	3 kph	21° true
Trackpoint	N51 12.225 E16 59.885	112 m			1 m	00:00:01	3 kph	31° true
Trackpoint	N51 12.225 E16 59.886	112 m			1 m	00:00:01	3 kph	38° true
Trackpoint	N51 12.226 E16 59.886	111 m			1 m	00:00:01	3 kph	45° true
Trackpoint	N51 12.226 E16 59.887	112 m			1 m	00:00:01	3 kph	53° true
Trackpoint	N51 12.226 E16 59.888	112 m			1 m	00:00:01	3 kph	67° true
Trackpoint	N51 12.226 E16 59.888	112 m			1 m	00:00:01	3 kph	75° true
Trackpoint	N51 12.226 E16 59.889	112 m			1 m	00:00:01	3 kph	76° true
Trackpoint	N51 12.227 E16 59.889	112 m			1 m	00:00:01	3 kph	76° true
Trackpoint	N51 12.227 E16 59.890	112 m			1 m	00:00:01	3 kph	79° true
Trackpoint	N51 12.227 E16 59.891	112 m			1 m	00:00:01	3 kph	90° true
Trackpoint	N51 12.227 E16 59.891	112 m			1 m	00:00:01	3 kph	102° true
Trackpoint	N51 12.226 E16 59.892	112 m			1 m	00:00:01	3 kph	102° true
Trackpoint	N51 12.226 E16 59.893	112 m			1 m	00:00:01	3 kph	98° true
Trackpoint	N51 12.226 E16 59.893	112 m			1 m	00:00:01	2 kph	107° true
Trackpoint	N51 12.226 E16 59.894	112 m			1 m	00:00:01	3 kph	112° true
Trackpoint	N51 12.226 E16 59.894	112 m			1 m	00:00:01	3 kph	108° true
Trackpoint	N51 12.226 E16 59.895	112 m			1 m	00:00:01	2 kph	113° true
Trackpoint	N51 12.226 E16 59.896	113 m			1 m	00:00:01	3 kph	120° true
Trackpoint	N51 12.225 E16 59.896	112 m			1 m	00:00:01	3 kph	120° true
Trackpoint	N51 12.225 E16 59.897	112 m			1 m	00:00:01	3 kph	123° true
Trackpoint	N51 12.225 E16 59.897	112 m			1 m	00:00:01	3 kph	130° true
Trackpoint	N51 12.225 E16 59.898	112 m			1 m	00:00:01	3 kph	131° true
Trackpoint	N51 12.224 E16 59.898	112 m			1 m	00:00:01	3 kph	130° true
Trackpoint	N51 12.224 E16 59.899	112 m			1 m	00:00:01	3 kph	132° true
Trackpoint	N51 12.224 E16 59.899	112 m			1 m	00:00:01	3 kph	131° true
Trackpoint	N51 12.223 E16 59.900	112 m			1 m	00:00:01	3 kph	131° true
Trackpoint	N51 12.223 E16 59.901	112 m			1 m	00:00:01	3 kph	132° true
Trackpoint	N51 12.223 E16 59.901	113 m			1 m	00:00:01	3 kph	139° true
Trackpoint	N51 12.222 E16 59.901	112 m			1 m	00:00:01	3 kph	143° true
Trackpoint	N51 12.222 E16 59.902	112 m			1 m	00:00:01	3 kph	141° true
Trackpoint	N51 12.222 E16 59.902	112 m			1 m	00:00:01	3 kph	143° true
Trackpoint	N51 12.221 E16 59.903	112 m			1 m	00:00:01	3 kph	148° true
Trackpoint	N51 12.221 E16 59.903	112 m			1 m	00:00:01	3 kph	149° true
Trackpoint	N51 12.221 E16 59.904	112 m			1 m	00:00:01	3 kph	146° true
Trackpoint	N51 12.220 E16 59.904	112 m			1 m	00:00:01	3 kph	149° true
Trackpoint	N51 12.220 E16 59.904	112 m			1 m	00:00:01	3 kph	156° true
Trackpoint	N51 12.219 E16 59.904	113 m			1 m	00:00:01	3 kph	152° true
Trackpoint	N51 12.219 E16 59.905	112 m			1 m	00:00:01	3 kph	161° true
Trackpoint	N51 12.219 E16 59.905	112 m			1 m	00:00:01	3 kph	172° true
Trackpoint	N51 12.218 E16 59.905	112 m			1 m	00:00:01	3 kph	179° true
Trackpoint	N51 12.218 E16 59.905	112 m			1 m	00:00:01	3 kph	193° true
Trackpoint	N51 12.217 E16 59.904	113 m			1 m	00:00:01	3 kph	204° true
Trackpoint	N51 12.217 E16 59.904	112 m			1 m	00:00:01	3 kph	205° true
Trackpoint	N51 12.217 E16 59.904	112 m			1 m	00:00:01	3 kph	210° true
Trackpoint	N51 12.216 E16 59.903	112 m			1 m	00:00:01	3 kph	219° true
Trackpoint	N51 12.216 E16 59.903	112 m			1 m	00:00:01	3 kph	226° true
Trackpoint	N51 12.216 E16 59.902	112 m			1 m	00:00:01	3 kph	227° true
Trackpoint	N51 12.215 E16 59.902	112 m			1 m	00:00:01	3 kph	235° true
Trackpoint	N51 12.215 E16 59.901	112 m			1 m	00:00:01	3 kph	244° true
Trackpoint	N51 12.215 E16 59.900	113 m			1 m	00:00:01	3 kph	250° true
Trackpoint	N51 12.215 E16 59.900	112 m			1 m	00:00:01	3 kph	252° true
Trackpoint	N51 12.215 E16 59.899	112 m			1 m	00:00:01	3 kph	261° true
Trackpoint	N51 12.215 E16 59.898	112 m			1 m	00:00:01	3 kph	269° true
Trackpoint	N51 12.215 E16 59.898	112 m			1 m	00:00:01	3 kph	270° true
Trackpoint	N51 12.215 E16 59.897	112 m			1 m	00:00:01	3 kph	271° true
Trackpoint	N51 12.215 E16 59.897	112 m			1 m	00:00:01	2 kph	281° true
Trackpoint	N51 12.215 E16 59.896	112 m			1 m	00:00:01	2 kph	282° true
Trackpoint	N51 12.215 E16 59.895	112 m			1 m	00:00:01	3 kph	281° true
Trackpoint	N51 12.215 E16 59.895	112 m			1 m	00:00:01	3 kph	293° true
Trackpoint	N51 12.215 E16 59.894	112 m			1 m	00:00:01	3 kph	291° true
Trackpoint	N51 12.215 E16 59.893	112 m			1 m	00:00:01	3 kph	291° true
Trackpoint	N51 12.216 E16 59.893	112 m			1 m	00:00:01	3 kph	294° true
Trackpoint	N51 12.216 E16 59.892	112 m			1 m	00:00:01	3 kph	297° true
Trackpoint	N51 12.216 E16 59.891	112 m			1 m	00:00:01	3 kph	293° true
Trackpoint	N51 12.216 E16 59.891	112 m			1 m	00:00:01	3 kph	292° true
Trackpoint	N51 12.216 E16 59.890	112 m			1 m	00:00:01	3 kph	300° true
Trackpoint	N51 12.217 E16 59.890	112 m			1 m	00:00:01	3 kph	301° true
Trackpoint	N51 12.217 E16 59.889	112 m			1 m	00:00:01	3 kph	303° true
Trackpoint	N51 12.217 E16 59.888	112 m			1 m	00:00:01	3 kph	305° true
Trackpoint	N51 12.217 E16 59.888	112 m			1 m	00:00:01	3 kph	304° true
Trackpoint	N51 12.217 E16 59.887	112 m			1 m	00:00:01	3 kph	301° true
Trackpoint	N51 12.218 E16 59.887	112 m			1 m	00:00:01	2 kph	304° true
Trackpoint	N51 12.218 E16 59.887	112 m			1 m	00:00:01	3 kph	323° true
Trackpoint	N51 12.218 E16 59.886	112 m			1 m	00:00:01	3 kph	328° true

## Sheet: Walking 3
Grid	Szer./dł. hddd°mm.mmm'
Datum	WGS 84
Header	Name	Elapsed Time	Length	Average Speed
Track	Foot-O-W5 (walking 3)	00:04:59	227 m	3 kph
Header	Position	Altitude	Depth	Temperature	Leg Length	Leg Time	Leg Speed	Leg Course
Trackpoint	N51 12.220 E16 59.886	112 m			1 m	00:00:01	2 kph	350° true
Trackpoint	N51 12.221 E16 59.885	112 m			1 m	00:00:01	4 kph	343° true
Trackpoint	N51 12.221 E16 59.885	112 m			1 m	00:00:01	5 kph	340° true
Trackpoint	N51 12.222 E16 59.885	112 m			1 m	00:00:01	5 kph	337° true
Trackpoint	N51 12.222 E16 59.884	112 m			1 m	00:00:01	4 kph	340° true
Trackpoint	N51 12.223 E16 59.884	112 m			1 m	00:00:01	4 kph	343° true
Trackpoint	N51 12.224 E16 59.884	112 m			1 m	00:00:01	4 kph	343° true
Trackpoint	N51 12.224 E16 59.883	112 m			1 m	00:00:01	4 kph	340° true
Trackpoint	N51 12.225 E16 59.883	112 m			1 m	00:00:01	3 kph	338° true
Trackpoint	N51 12.225 E16 59.883	112 m			1 m	00:00:01	3 kph	342° true
Trackpoint	N51 12.226 E16 59.883	112 m			1 m	00:00:01	3 kph	344° true
Trackpoint	N51 12.226 E16 59.882	112 m			1 m	00:00:01	3 kph	348° true
Trackpoint	N51 12.226 E16 59.882	112 m			1 m	00:00:01	3 kph	345° true
Trackpoint	N51 12.227 E16 59.882	112 m			1 m	00:00:01	3 kph	343° true
Trackpoint	N51 12.227 E16 59.882	112 m			1 m	00:00:01	3 kph	350° true
Trackpoint	N51 12.228 E16 59.882	112 m			1 m	00:00:01	3 kph	353° true
Trackpoint	N51 12.228 E16 59.882	113 m			1 m	00:00:01	3 kph	355° true
Trackpoint	N51 12.229 E16 59.882	112 m			1 m	00:00:01	3 kph	2° true
Trackpoint	N51 12.229 E16 59.882	112 m			1 m	00:00:01	3 kph	3° true
Trackpoint	N51 12.230 E16 59.882	112 m			1 m	00:00:01	3 kph	4° true
Trackpoint	N51 12.230 E16 59.882	112 m			1 m	00:00:01	3 kph	9° true
Trackpoint	N51 12.231 E16 59.882	112 m			1 m	00:00:01	3 kph	11° true
Trackpoint	N51 12.231 E16 59.882	112 m			1 m	00:00:01	3 kph	13° true
Trackpoint	N51 12.232 E16 59.882	113 m			1 m	00:00:01	3 kph	12° true
Trackpoint	N51 12.232 E16 59.883	112 m			1 m	00:00:01	3 kph	13° true
Trackpoint	N51 12.232 E16 59.883	112 m			1 m	00:00:01	3 kph	18° true
Trackpoint	N51 12.233 E16 59.883	112 m			1 m	00:00:01	3 kph	22° true
Trackpoint	N51 12.233 E16 59.883	112 m			1 m	00:00:01	2 kph	28° true
Trackpoint	N51 12.233 E16 59.884	113 m			1 m	00:00:01	3 kph	29° true
Trackpoint	N51 12.234 E16 59.884	112 m			1 m	00:00:01	2 kph	30° true
Trackpoint	N51 12.234 E16 59.884	112 m			1 m	00:00:01	2 kph	32° true
Trackpoint	N51 12.234 E16 59.885	112 m			1 m	00:00:01	3 kph	36° true
Trackpoint	N51 12.235 E16 59.885	112 m			1 m	00:00:01	2 kph	45° true
Trackpoint	N51 12.235 E16 59.885	112 m			1 m	00:00:01	2 kph	48° true
Trackpoint	N51 12.235 E16 59.886	112 m			1 m	00:00:01	3 kph	47° true
Trackpoint	N51 12.235 E16 59.886	112 m			1 m	00:00:01	3 kph	52° true
Trackpoint	N51 12.236 E16 59.887	112 m			1 m	00:00:01	2 kph	58° true
Trackpoint	N51 12.236 E16 59.887	112 m			1 m	00:00:01	3 kph	58° true
Trackpoint	N51 12.236 E16 59.888	112 m			1 m	00:00:01	3 kph	57° true
Trackpoint	N51 12.236 E16 59.889	112 m			1 m	00:00:01	3 kph	64° true
Trackpoint	N51 12.236 E16 59.889	112 m			1 m	00:00:01	3 kph	69° true
Trackpoint	N51 12.237 E16 59.890	113 m			1 m	00:00:01	3 kph	69° true
Trackpoint	N51 12.237 E16 59.891	113 m			1 m	00:00:01	3 kph	74° true
Trackpoint	N51 12.237 E16 59.891	112 m			1 m	00:00:01	3 kph	77° true
Trackpoint	N51 12.237 E16 59.892	113 m			1 m	00:00:01	3 kph	81° true
Trackpoint	N51 12.237 E16 59.892	112 m			1 m	00:00:01	3 kph	83° true
Trackpoint	N51 12.237 E16 59.893	112 m			1 m	00:00:01	3 kph	86° true
Trackpoint	N51 12.237 E16 59.894	112 m			1 m	00:00:01	2 kph	94° true
Trackpoint	N51 12.237 E16 59.894	112 m			1 m	00:00:01	3 kph	95° true
Trackpoint	N51 12.237 E16 59.895	113 m			1 m	00:00:01	3 kph	98° true
Trackpoint	N51 12.237 E16 59.895	112 m			1 m	00:00:01	2 kph	105° true
Trackpoint	N51 12.237 E16 59.896	112 m			1 m	00:00:01	3 kph	112° true
Trackpoint	N51 12.236 E16 59.897	112 m			1 m	00:00:01	3 kph	114° true
Trackpoint	N51 12.236 E16 59.897	112 m			1 m	00:00:01	2 kph	114° true
Trackpoint	N51 12.236 E16 59.898	112 m			1 m	00:00:01	3 kph	114° true
Trackpoint	N51 12.236 E16 59.898	112 m			1 m	00:00:01	3 kph	115° true
Trackpoint	N51 12.236 E16 59.899	112 m			1 m	00:00:01	2 kph	115° true
Trackpoint	N51 12.236 E16 59.899	112 m			1 m	00:00:01	3 kph	120° true
Trackpoint	N51 12.235 E16 59.900	112 m			1 m	00:00:01	3 kph	125° true
Trackpoint	N51 12.235 E16 59.900	112 m			1 m	00:00:01	3 kph	130° true
Trackpoint	N51 12.235 E16 59.901	112 m			1 m	00:00:01	3 kph	137° true
Trackpoint	N51 12.234 E16 59.901	112 m			1 m	00:00:01	3 kph	136° true
Trackpoint	N51 12.234 E16 59.902	112 m			1 m	00:00:01	3 kph	134° true
Trackpoint	N51 12.234 E16 59.902	112 m			1 m	00:00:01	3 kph	134° true
Trackpoint	N51 12.234 E16 59.903	112 m			1 m	00:00:01	3 kph	135° true
Trackpoint	N51 12.233 E16 59.903	112 m			1 m	00:00:01	3 kph	140° true
Trackpoint	N51 12.233 E16 59.903	112 m			1 m	00:00:01	3 kph	146° true
Trackpoint	N51 12.233 E16 59.904	112 m			1 m	00:00:01	2 kph	153° true
Trackpoint	N51 12.232 E16 59.904	112 m			1 m	00:00:01	3 kph	156° true
Trackpoint	N51 12.232 E16 59.904	112 m			1 m	00:00:01	3 kph	155° true
Trackpoint	N51 12.231 E16 59.905	111 m			1 m	00:00:01	3 kph	157° true
Trackpoint	N51 12.231 E16 59.905	112 m			1 m	00:00:01	3 kph	164° true
Trackpoint	N51 12.231 E16 59.905	111 m			1 m	00:00:01	3 kph	168° true
Trackpoint	N51 12.230 E16 59.905	112 m			1 m	00:00:01	3 kph	171° true
Trackpoint	N51 12.230 E16 59.905	112 m			1 m	00:00:01	3 kph	177° true
Trackpoint	N51 12.229 E16 59.905	112 m			1 m	00:00:01	3 kph	181° true
Trackpoint	N51 12.229 E16 59.905	111 m			1 m	00:00:01	3 kph	181° true
Trackpoint	N51 12.229 E16 59.905	112 m			1 m	00:00:01	3 kph	184° true
Trackpoint	N51 12.228 E16 59.905	112 m			1 m	00:00:01	3 kph	190° true
Trackpoint	N51 12.228 E16 59.905	111 m			1 m	00:00:01	3 kph	192° true
Trackpoint	N51 12.227 E16 59.904	112 m			1 m	00:00:01	3 kph	194° true
Trackpoint	N51 12.227 E16 59.904	111 m			1 m	00:00:01	3 kph	199° true
Trackpoint	N51 12.226 E16 59.904	111 m			1 m	00:00:01	3 kph	203° true
Trackpoint	N51 12.226 E16 59.904	112 m			1 m	00:00:01	3 kph	203° true
Trackpoint	N51 12.226 E16 59.903	112 m			1 m	00:00:01	3 kph	203° true
Trackpoint	N51 12.225 E16 59.903	111 m			1 m	00:00:01	3 kph	202° true
Trackpoint	N51 12.225 E16 59.903	112 m			1 m	00:00:01	3 kph	204° true
Trackpoint	N51 12.224 E16 59.903	111 m			1 m	00:00:01	3 kph	211° true
Trackpoint	N51 12.224 E16 59.902	112 m			1 m	00:00:01	3 kph	215° true
Trackpoint	N51 12.224 E16 59.902	112 m			1 m	00:00:01	3 kph	214° true
Trackpoint	N51 12.223 E16 59.901	111 m			1 m	00:00:01	3 kph	214° true
Trackpoint	N51 12.223 E16 59.901	112 m			1 m	00:00:01	3 kph	215° true
Trackpoint	N51 12.223 E16 59.901	111 m			1 m	00:00:01	2 kph	215° true
Trackpoint	N51 12.223 E16 59.900	111 m			1 m	00:00:01	2 kph	221° true
Trackpoint	N51 12.222 E16 59.900	111 m			1 m	00:00:01	3 kph	218° true
Trackpoint	N51 12.222 E16 59.900	111 m			1 m	00:00:01	2 kph	224° true
Trackpoint	N51 12.222 E16 59.899	112 m			1 m	00:00:01	2 kph	234° true
Trackpoint	N51 12.222 E16 59.899	111 m			1 m	00:00:01	2 kph	234° true
Trackpoint	N51 12.221 E16 59.898	111 m			1 m	00:00:01	2 kph	236° true
Trackpoint	N51 12.221 E16 59.898	112 m			1 m	00:00:01	2 kph	238° true
Trackpoint	N51 12.221 E16 59.897	111 m			1 m	00:00:01	3 kph	243° true
Trackpoint	N51 12.221 E16 59.896	111 m			1 m	00:00:01	3 kph	247° true
Trackpoint	N51 12.221 E16 59.896	112 m			1 m	00:00:01	3 kph	251° true
Trackpoint	N51 12.221 E16 59.895	111 m			1 m	00:00:01	3 kph	252° true
Trackpoint	N51 12.220 E16 59.895	110 m			1 m	00:00:01	3 kph	256° true
Trackpoint	N51 12.220 E16 59.894	111 m			1 m	00:00:01	3 kph	257° true
Trackpoint	N51 12.220 E16 59.893	111 m			1 m	00:00:01	3 kph	251° true
Trackpoint	N51 12.220 E16 59.893	112 m			1 m	00:00:01	3 kph	255° true
Trackpoint	N51 12.220 E16 59.892	111 m			1 m	00:00:01	3 kph	259° true
Trackpoint	N51 12.220 E16 59.892	111 m			1 m	00:00:01	3 kph	265° true
Trackpoint	N51 12.220 E16 59.891	111 m			1 m	00:00:01	3 kph	278° true
Trackpoint	N51 12.220 E16 59.890	111 m			1 m	00:00:01	3 kph	283° true
Trackpoint	N51 12.220 E16 59.890	111 m			1 m	00:00:01	3 kph	281° true
Trackpoint	N51 12.220 E16 59.889	111 m			1 m	00:00:01	3 kph	280° true
Trackpoint	N51 12.220 E16 59.888	111 m			1 m	00:00:01	3 kph	280° true
Trackpoint	N51 12.220 E16 59.888	111 m			1 m	00:00:01	2 kph	287° true
Trackpoint	N51 12.221 E16 59.887	111 m			1 m	00:00:01	3 kph	297° true
Trackpoint	N51 12.221 E16 59.887	111 m			1 m	00:00:01	3 kph	301° true
Trackpoint	N51 12.221 E16 59.886	111 m			1 m	00:00:01	3 kph	298° true
Trackpoint	N51 12.221 E16 59.885	111 m			1 m	00:00:01	3 kph	300° true
Trackpoint	N51 12.222 E16 59.885	111 m			1 m	00:00:01	3 kph	301° true
Trackpoint	N51 12.222 E16 59.884	111 m			1 m	00:00:01	3 kph	301° true
Trackpoint	N51 12.222 E16 59.884	111 m			1 m	00:00:01	3 kph	300° true
Trackpoint	N51 12.222 E16 59.883	111 m			1 m	00:00:01	3 kph	303° true
Trackpoint	N51 12.222 E16 59.883	110 m			1 m	00:00:01	3 kph	309° true
Trackpoint	N51 12.223 E16 59.882	111 m			1 m	00:00:01	3 kph	310° true
Trackpoint	N51 12.223 E16 59.882	111 m			1 m	00:00:01	3 kph	307° true
Trackpoint	N51 12.223 E16 59.881	111 m			1 m	00:00:01	3 kph	307° true
Trackpoint	N51 12.224 E16 59.880	111 m			1 m	00:00:01	3 kph	306° true
Trackpoint	N51 12.224 E16 59.880	110 m			1 m	00:00:01	3 kph	306° true
Trackpoint	N51 12.224 E16 59.879	111 m			1 m	00:00:01	3 kph	308° true
Trackpoint	N51 12.224 E16 59.879	111 m			1 m	00:00:01	3 kph	309° true
Trackpoint	N51 12.225 E16 59.878	111 m			1 m	00:00:01	3 kph	310° true
Trackpoint	N51 12.225 E16 59.878	111 m			1 m	00:00:01	3 kph	310° true
Trackpoint	N51 12.225 E16 59.877	111 m			1 m	00:00:01	3 kph	313° true
Trackpoint	N51 12.225 E16 59.877	111 m			1 m	00:00:01	3 kph	317° true
Trackpoint	N51 12.226 E16 59.876	111 m			1 m	00:00:01	3 kph	312° true
Trackpoint	N51 12.226 E16 59.876	111 m			1 m	00:00:01	3 kph	312° true
Trackpoint	N51 12.226 E16 59.875	111 m			1 m	00:00:01	3 kph	310° true
Trackpoint	N51 12.226 E16 59.875	111 m			1 m	00:00:01	3 kph	301° true
Trackpoint	N51 12.227 E16 59.874	111 m			1 m	00:00:01	3 kph	303° true
Trackpoint	N51 12.227 E16 59.874	111 m			1 m	00:00:01	3 kph	305° true
Trackpoint	N51 12.227 E16 59.873	111 m			1 m	00:00:01	2 kph	302° true
Trackpoint	N51 12.227 E16 59.873	111 m			1 m	00:00:01	3 kph	305° true
Trackpoint	N51 12.228 E16 59.872	110 m			1 m	00:00:01	3 kph	303° true
Trackpoint	N51 12.228 E16 59.872	111 m			1 m	00:00:01	3 kph	310° true
Trackpoint	N51 12.229 E16 59.869	111 m			4 m	00:00:05	3 kph	313° true
Trackpoint	N51 12.230 E16 59.869	111 m			1 m	00:00:02	3 kph	323° true
Trackpoint	N51 12.230 E16 59.868	111 m			1 m	00:00:01	3 kph	320° true
Trackpoint	N51 12.230 E16 59.868	111 m			1 m	00:00:01	3 kph	320° true
Trackpoint	N51 12.231 E16 59.867	111 m			1 m	00:00:01	3 kph	319° true
Trackpoint	N51 12.231 E16 59.867	110 m			1 m	00:00:01	3 kph	324° true
Trackpoint	N51 12.231 E16 59.867	111 m			1 m	00:00:01	3 kph	328° true
Trackpoint	N51 12.232 E16 59.866	111 m			1 m	00:00:01	3 kph	328° true
Trackpoint	N51 12.232 E16 59.866	111 m			1 m	00:00:01	3 kph	322° true
Trackpoint	N51 12.232 E16 59.865	111 m			1 m	00:00:01	3 kph	318° true
Trackpoint	N51 12.233 E16 59.865	111 m			1 m	00:00:01	3 kph	317° true
Trackpoint	N51 12.233 E16 59.864	111 m			1 m	00:00:01	3 kph	318° true
Trackpoint	N51 12.233 E16 59.864	111 m			1 m	00:00:01	3 kph	316° true
Trackpoint	N51 12.234 E16 59.863	111 m			1 m	00:00:01	3 kph	312° true
Trackpoint	N51 12.234 E16 59.863	111 m			1 m	00:00:01	3 kph	313° true
Trackpoint	N51 12.234 E16 59.863	110 m			1 m	00:00:01	3 kph	319° true
Trackpoint	N51 12.235 E16 59.862	111 m			1 m	00:00:01	3 kph	326° true
Trackpoint	N51 12.235 E16 59.862	111 m			1 m	00:00:01	3 kph	328° true
Trackpoint	N51 12.235 E16 59.862	111 m			1 m	00:00:01	2 kph	331° true
Trackpoint	N51 12.236 E16 59.861	111 m			1 m	00:00:01	3 kph	336° true
Trackpoint	N51 12.236 E16 59.861	111 m			1 m	00:00:01	3 kph	337° true
Trackpoint	N51 12.236 E16 59.861	111 m			1 m	00:00:01	3 kph	339° true
Trackpoint	N51 12.237 E16 59.861	111 m			1 m	00:00:01	3 kph	344° true
Trackpoint	N51 12.237 E16 59.860	111 m			1 m	00:00:01	2 kph	343° true
Trackpoint	N51 12.238 E16 59.860	111 m			1 m	00:00:01	3 kph	344° true
Trackpoint	N51 12.238 E16 59.860	111 m			1 m	00:00:01	3 kph	344° true
Trackpoint	N51 12.238 E16 59.860	110 m			1 m	00:00:01	3 kph	340° true
Trackpoint	N51 12.239 E16 59.860	111 m			1 m	00:00:01	3 kph	341° true
Trackpoint	N51 12.239 E16 59.859	111 m			1 m	00:00:01	3 kph	348° true
Trackpoint	N51 12.240 E16 59.859	111 m			1 m	00:00:01	3 kph	354° true
Trackpoint	N51 12.240 E16 59.859	112 m			1 m	00:00:01	3 kph	353° true
Trackpoint	N51 12.240 E16 59.859	111 m			1 m	00:00:01	3 kph	357° true
Trackpoint	N51 12.241 E16 59.859	111 m			1 m	00:00:01	3 kph	3° true
Trackpoint	N51 12.241 E16 59.859	111 m			1 m	00:00:01	3 kph	2° true
Trackpoint	N51 12.242 E16 59.859	111 m			1 m	00:00:01	3 kph	357° true
Trackpoint	N51 12.242 E16 59.859	111 m			1 m	00:00:01	3 kph	358° true
Trackpoint	N51 12.243 E16 59.859	111 m			1 m	00:00:01	3 kph	359° true
Trackpoint	N51 12.243 E16 59.859	111 m			1 m	00:00:01	3 kph	358° true
Trackpoint	N51 12.244 E16 59.859	111 m			1 m	00:00:01	3 kph	0° true
Trackpoint	N51 12.244 E16 59.859	111 m			1 m	00:00:01	3 kph	1° true
Trackpoint	N51 12.244 E16 59.859	111 m			1 m	00:00:01	3 kph	0° true
Trackpoint	N51 12.245 E16 59.859	111 m			1 m	00:00:01	3 kph	351° true
Trackpoint	N51 12.245 E16 59.859	111 m			1 m	00:00:01	3 kph	350° true
Trackpoint	N51 12.246 E16 59.859	111 m			1 m	00:00:01	3 kph	359° true
Trackpoint	N51 12.246 E16 59.859	111 m			1 m	00:00:01	3 kph	0° true
Trackpoint	N51 12.246 E16 59.859	111 m			1 m	00:00:01	3 kph	2° true
Trackpoint	N51 12.247 E16 59.859	111 m			1 m	00:00:01	3 kph	4° true
Trackpoint	N51 12.247 E16 59.859	111 m			1 m	00:00:01	3 kph	5° true
Trackpoint	N51 12.248 E16 59.859	111 m			1 m	00:00:01	3 kph	6° true
Trackpoint	N51 12.248 E16 59.859	111 m			1 m	00:00:01	3 kph	5° true
Trackpoint	N51 12.249 E16 59.859	111 m			1 m	00:00:01	3 kph	4° true
Trackpoint	N51 12.249 E16 59.859	111 m			1 m	00:00:01	3 kph	8° true
Trackpoint	N51 12.250 E16 59.859	111 m			1 m	00:00:01	3 kph	5° true
Trackpoint	N51 12.250 E16 59.860	111 m			1 m	00:00:01	3 kph	6° true
Trackpoint	N51 12.250 E16 59.860	111 m			1 m	00:00:01	3 kph	10° true
Trackpoint	N51 12.251 E16 59.860	111 m			1 m	00:00:01	3 kph	8° true
Trackpoint	N51 12.251 E16 59.860	111 m			1 m	00:00:01	3 kph	9° true
Trackpoint	N51 12.252 E16 59.860	111 m			1 m	00:00:01	3 kph	8° true
Trackpoint	N51 12.252 E16 59.860	111 m			1 m	00:00:01	3 kph	6° true
Trackpoint	N51 12.252 E16 59.860	111 m			1 m	00:00:01	3 kph	9° true
Trackpoint	N51 12.253 E16 59.860	111 m			1 m	00:00:01	3 kph	10° true
Trackpoint	N51 12.253 E16 59.860	111 m			1 m	00:00:01	3 kph	10° true
Trackpoint	N51 12.254 E16 59.861	111 m			1 m	00:00:01	3 kph	12° true
Trackpoint	N51 12.254 E16 59.861	111 m			1 m	00:00:01	3 kph	14° true
Trackpoint	N51 12.254 E16 59.861	111 m			1 m	00:00:01	2 kph	18° true
Trackpoint	N51 12.255 E16 59.861	111 m			1 m	00:00:01	3 kph	18° true
Trackpoint	N51 12.255 E16 59.861	111 m			1 m	00:00:01	3 kph	18° true
Trackpoint	N51 12.256 E16 59.861	111 m			1 m	00:00:01	3 kph	17° true
Trackpoint	N51 12.256 E16 59.862	112 m			1 m	00:00:01	3 kph	14° true
Trackpoint	N51 12.256 E16 59.862	111 m			1 m	00:00:01	2 kph	17° true
Trackpoint	N51 12.257 E16 59.862	111 m			1 m	00:00:01	3 kph	22° true
Trackpoint	N51 12.257 E16 59.862	111 m			1 m	00:00:01	3 kph	20° true
Trackpoint	N51 12.258 E16 59.862	111 m			1 m	00:00:01	3 kph	21° true
Trackpoint	N51 12.258 E16 59.863	111 m			1 m	00:00:01	3 kph	25° true
Trackpoint	N51 12.258 E16 59.863	111 m			1 m	00:00:01	2 kph	32° true
Trackpoint	N51 12.259 E16 59.863	111 m			1 m	00:00:01	2 kph	31° true
Trackpoint	N51 12.259 E16 59.864	111 m			1 m	00:00:01	3 kph	30° true
Trackpoint	N51 12.259 E16 59.864	111 m			1 m	00:00:01	3 kph	37° true
Trackpoint	N51 12.260 E16 59.864	112 m			1 m	00:00:01	3 kph	34° true
Trackpoint	N51 12.260 E16 59.865	112 m			1 m	00:00:01	2 kph	32° true
Trackpoint	N51 12.260 E16 59.865	111 m			1 m	00:00:01	3 kph	34° true
Trackpoint	N51 12.260 E16 59.865	112 m			0 m	00:00:01	2 kph	40° true
Trackpoint	N51 12.261 E16 59.866	112 m			1 m	00:00:01	2 kph	45° true
Trackpoint	N51 12.261 E16 59.866	111 m			1 m	00:00:01	2 kph	50° true
Trackpoint	N51 12.261 E16 59.866	111 m			0 m	00:00:01	2 kph	54° true
Trackpoint	N51 12.261 E16 59.867	111 m			1 m	00:00:01	2 kph	51° true
Trackpoint	N51 12.261 E16 59.867	112 m			1 m	00:00:01	2 kph	48° true
Trackpoint	N51 12.262 E16 59.868	111 m			1 m	00:00:01	2 kph	51° true
Trackpoint	N51 12.262 E16 59.868	112 m			1 m	00:00:01	2 kph	49° true
Trackpoint	N51 12.262 E16 59.868	112 m			1 m	00:00:01	2 kph	46° true
Trackpoint	N51 12.262 E16 59.869	112 m			1 m	00:00:01	2 kph	47° true
Trackpoint	N51 12.262 E16 59.869	112 m			1 m	00:00:01	2 kph	48° true
Trackpoint	N51 12.263 E16 59.870	111 m			1 m	00:00:01	2 kph	56° true
Trackpoint	N51 12.263 E16 59.870	112 m			1 m	00:00:01	2 kph	60° true
Trackpoint	N51 12.263 E16 59.870	112 m			1 m	00:00:01	2 kph	54° true
Trackpoint	N51 12.263 E16 59.871	112 m			1 m	00:00:01	2 kph	52° true
Trackpoint	N51 12.263 E16 59.871	112 m			1 m	00:00:01	3 kph	53° true
Trackpoint	N51 12.264 E16 59.872	112 m			1 m	00:00:01	2 kph	57° true
Trackpoint	N51 12.264 E16 59.872	112 m			1 m	00:00:01	2 kph	58° true
Trackpoint	N51 12.264 E16 59.873	111 m			1 m	00:00:01	2 kph	56° true
Trackpoint	N51 12.264 E16 59.873	112 m			1 m	00:00:01	2 kph	60° true
Trackpoint	N51 12.264 E16 59.874	112 m			1 m	00:00:01	2 kph	61° true
Trackpoint	N51 12.265 E16 59.874	112 m			1 m	00:00:01	2 kph	61° true
Trackpoint	N51 12.265 E16 59.875	112 m			1 m	00:00:01	2 kph	54° true
Trackpoint	N51 12.265 E16 59.875	112 m			1 m	00:00:01	3 kph	54° true
Trackpoint	N51 12.265 E16 59.876	112 m			1 m	00:00:01	2 kph	60° true
Trackpoint	N51 12.265 E16 59.876	112 m			1 m	00:00:01	2 kph	55° true
Trackpoint	N51 12.266 E16 59.877	112 m			1 m	00:00:01	2 kph	61° true
Trackpoint	N51 12.266 E16 59.877	112 m			1 m	00:00:01	3 kph	69° true
Trackpoint	N51 12.266 E16 59.878	112 m			1 m	00:00:01	3 kph	65° true
Trackpoint	N51 12.266 E16 59.878	112 m			1 m	00:00:01	3 kph	62° true
Trackpoint	N51 12.266 E16 59.879	112 m			1 m	00:00:01	3 kph	62° true
Trackpoint	N51 12.266 E16 59.880	112 m			1 m	00:00:01	2 kph	68° true
Trackpoint	N51 12.267 E16 59.880	112 m			1 m	00:00:01	3 kph	67° true
Trackpoint	N51 12.267 E16 59.881	112 m			1 m	00:00:01	3 kph	71° true
Trackpoint	N51 12.267 E16 59.881	112 m			1 m	00:00:01	3 kph	74° true
Trackpoint	N51 12.267 E16 59.882	112 m			1 m	00:00:01	3 kph	71° true
Trackpoint	N51 12.267 E16 59.883	112 m			1 m	00:00:01	3 kph	70° true
Trackpoint	N51 12.267 E16 59.883	111 m			1 m	00:00:01	3 kph	71° true
Trackpoint	N51 12.267 E16 59.884	111 m			1 m	00:00:01	3 kph	69° true
Trackpoint	N51 12.267 E16 59.884	112 m			1 m	00:00:01	3 kph	69° true
Trackpoint	N51 12.268 E16 59.885	112 m			1 m	00:00:01	2 kph	69° true
Trackpoint	N51 12.268 E16 59.886	112 m			1 m	00:00:01	3 kph	75° true
Trackpoint	N51 12.268 E16 59.886	112 m			1 m	00:00:01	3 kph	79° true
Trackpoint	N51 12.268 E16 59.887	112 m			1 m	00:00:01	2 kph	87° true
Trackpoint	N51 12.268 E16 59.887	111 m			1 m	00:00:01	2 kph	90° true
Trackpoint	N51 12.268 E16 59.888	112 m			1 m	00:00:01	3 kph	94° true
Trackpoint	N51 12.268 E16 59.889	112 m			1 m	00:00:01	3 kph	101° true
Trackpoint	N51 12.268 E16 59.889	111 m			1 m	00:00:01	2 kph	97° true
Trackpoint	N51 12.268 E16 59.890	111 m			1 m	00:00:01	2 kph	99° true
Trackpoint	N51 12.267 E16 59.890	111 m			1 m	00:00:01	3 kph	106° true
Trackpoint	N51 12.267 E16 59.891	112 m			1 m	00:00:01	3 kph	110° true
Trackpoint	N51 12.267 E16 59.891	112 m			1 m	00:00:01	2 kph	117° true
Trackpoint	N51 12.267 E16 59.892	111 m			1 m	00:00:01	3 kph	114° true
Trackpoint	N51 12.267 E16 59.893	111 m			1 m	00:00:01	3 kph	115° true
Trackpoint	N51 12.267 E16 59.893	112 m			1 m	00:00:01	3 kph	117° true
Trackpoint	N51 12.266 E16 59.894	111 m			1 m	00:00:01	3 kph	120° true
Trackpoint	N51 12.266 E16 59.894	111 m			1 m	00:00:01	3 kph	118° true
Trackpoint	N51 12.266 E16 59.895	111 m			1 m	00:00:01	3 kph	121° true
Trackpoint	N51 12.266 E16 59.896	111 m			1 m	00:00:01	3 kph	120° true
Trackpoint	N51 12.266 E16 59.896	111 m			1 m	00:00:01	3 kph	120° true
Trackpoint	N51 12.265 E16 59.897	112 m			1 m	00:00:01	3 kph	121° true
Trackpoint	N51 12.265 E16 59.897	111 m			1 m	00:00:01	2 kph	118° true
Trackpoint	N51 12.265 E16 59.898	111 m			1 m	00:00:01	2 kph	128° true
Trackpoint	N51 12.265 E16 59.898	112 m			1 m	00:00:01	3 kph	132° true
Trackpoint	N51 12.264 E16 59.899	112 m			1 m	00:00:01	3 kph	129° true
Trackpoint	N51 12.264 E16 59.899	112 m			1 m	00:00:01	3 kph	131° true
Trackpoint	N51 12.264 E16 59.899	111 m			1 m	00:00:01	3 kph	132° true

## Sheet: Walking 4
Grid	Szer./dł. hddd°mm.mmm'
Datum	WGS 84
Header	Name	Elapsed Time	Length	Average Speed
Track	Foot-O-W5 (walking 4)	00:05:00	229 m	3 kph
Header	Position	Altitude	Depth	Temperature	Leg Length	Leg Time	Leg Speed	Leg Course
Trackpoint	N51 12.259 E16 59.904	112 m			1 m	00:00:01	4 kph	164° true
Trackpoint	N51 12.258 E16 59.904	112 m			1 m	00:00:01	4 kph	165° true
Trackpoint	N51 12.257 E16 59.905	112 m			1 m	00:00:01	4 kph	167° true
Trackpoint	N51 12.257 E16 59.905	112 m			1 m	00:00:01	4 kph	168° true
Trackpoint	N51 12.256 E16 59.905	112 m			1 m	00:00:01	4 kph	165° true
Trackpoint	N51 12.256 E16 59.905	112 m			1 m	00:00:01	4 kph	168° true
Trackpoint	N51 12.255 E16 59.905	111 m			1 m	00:00:01	3 kph	169° true
Trackpoint	N51 12.255 E16 59.906	112 m			1 m	00:00:01	3 kph	168° true
Trackpoint	N51 12.254 E16 59.906	112 m			1 m	00:00:01	3 kph	161° true
Trackpoint	N51 12.254 E16 59.906	112 m			1 m	00:00:01	3 kph	166° true
Trackpoint	N51 12.253 E16 59.906	112 m			1 m	00:00:01	3 kph	168° true
Trackpoint	N51 12.253 E16 59.906	112 m			1 m	00:00:01	3 kph	169° true
Trackpoint	N51 12.253 E16 59.906	111 m			1 m	00:00:01	3 kph	173° true
Trackpoint	N51 12.252 E16 59.906	112 m			1 m	00:00:01	3 kph	171° true
Trackpoint	N51 12.252 E16 59.907	112 m			1 m	00:00:01	3 kph	172° true
Trackpoint	N51 12.251 E16 59.907	111 m			1 m	00:00:01	3 kph	172° true
Trackpoint	N51 12.251 E16 59.907	112 m			1 m	00:00:01	3 kph	173° true
Trackpoint	N51 12.250 E16 59.907	112 m			1 m	00:00:01	3 kph	174° true
Trackpoint	N51 12.250 E16 59.907	111 m			1 m	00:00:01	3 kph	175° true
Trackpoint	N51 12.249 E16 59.907	111 m			1 m	00:00:01	3 kph	180° true
Trackpoint	N51 12.249 E16 59.907	112 m			1 m	00:00:01	3 kph	178° true
Trackpoint	N51 12.249 E16 59.907	112 m			1 m	00:00:01	3 kph	175° true
Trackpoint	N51 12.248 E16 59.907	111 m			1 m	00:00:01	2 kph	174° true
Trackpoint	N51 12.248 E16 59.907	112 m			1 m	00:00:01	3 kph	176° true
Trackpoint	N51 12.247 E16 59.907	111 m			1 m	00:00:01	3 kph	178° true
Trackpoint	N51 12.247 E16 59.907	111 m			1 m	00:00:01	3 kph	175° true
Trackpoint	N51 12.247 E16 59.907	112 m			1 m	00:00:01	3 kph	174° true
Trackpoint	N51 12.246 E16 59.907	111 m			1 m	00:00:01	3 kph	175° true
Trackpoint	N51 12.246 E16 59.907	112 m			1 m	00:00:01	3 kph	174° true
Trackpoint	N51 12.245 E16 59.907	112 m			1 m	00:00:01	3 kph	178° true
Trackpoint	N51 12.245 E16 59.907	111 m			1 m	00:00:01	3 kph	182° true
Trackpoint	N51 12.244 E16 59.907	112 m			1 m	00:00:01	3 kph	183° true
Trackpoint	N51 12.244 E16 59.907	112 m			1 m	00:00:01	3 kph	184° true
Trackpoint	N51 12.244 E16 59.907	112 m			1 m	00:00:01	3 kph	185° true
Trackpoint	N51 12.243 E16 59.907	112 m			1 m	00:00:01	3 kph	186° true
Trackpoint	N51 12.243 E16 59.907	112 m			1 m	00:00:01	3 kph	190° true
Trackpoint	N51 12.242 E16 59.907	111 m			1 m	00:00:01	3 kph	196° true
Trackpoint	N51 12.242 E16 59.907	111 m			1 m	00:00:01	3 kph	197° true
Trackpoint	N51 12.242 E16 59.906	112 m			1 m	00:00:01	3 kph	196° true
Trackpoint	N51 12.241 E16 59.906	112 m			1 m	00:00:01	3 kph	197° true
Trackpoint	N51 12.241 E16 59.906	112 m			1 m	00:00:01	3 kph	203° true
Trackpoint	N51 12.241 E16 59.906	111 m			1 m	00:00:01	3 kph	206° true
Trackpoint	N51 12.240 E16 59.905	112 m			1 m	00:00:01	3 kph	210° true
Trackpoint	N51 12.240 E16 59.905	112 m			1 m	00:00:01	3 kph	208° true
Trackpoint	N51 12.239 E16 59.905	112 m			1 m	00:00:01	3 kph	208° true
Trackpoint	N51 12.239 E16 59.904	111 m			1 m	00:00:01	3 kph	206° true
Trackpoint	N51 12.239 E16 59.904	112 m			1 m	00:00:01	3 kph	209° true
Trackpoint	N51 12.238 E16 59.904	111 m			1 m	00:00:01	3 kph	211° true
Trackpoint	N51 12.238 E16 59.903	111 m			1 m	00:00:01	3 kph	210° true
Trackpoint	N51 12.237 E16 59.903	111 m			1 m	00:00:01	3 kph	210° true
Trackpoint	N51 12.237 E16 59.902	111 m			1 m	00:00:01	3 kph	214° true
Trackpoint	N51 12.237 E16 59.902	111 m			1 m	00:00:01	3 kph	216° true
Trackpoint	N51 12.236 E16 59.902	111 m			1 m	00:00:01	3 kph	215° true
Trackpoint	N51 12.236 E16 59.901	111 m			1 m	00:00:01	3 kph	222° true
Trackpoint	N51 12.236 E16 59.901	111 m			1 m	00:00:01	3 kph	215° true
Trackpoint	N51 12.235 E16 59.900	111 m			1 m	00:00:01	3 kph	212° true
Trackpoint	N51 12.235 E16 59.900	111 m			1 m	00:00:01	3 kph	210° true
Trackpoint	N51 12.235 E16 59.900	111 m			1 m	00:00:01	3 kph	211° true
Trackpoint	N51 12.234 E16 59.899	111 m			1 m	00:00:01	3 kph	212° true
Trackpoint	N51 12.234 E16 59.899	111 m			1 m	00:00:01	3 kph	214° true
Trackpoint	N51 12.233 E16 59.899	111 m			1 m	00:00:01	3 kph	215° true
Trackpoint	N51 12.233 E16 59.898	111 m			1 m	00:00:01	3 kph	211° true
Trackpoint	N51 12.233 E16 59.898	111 m			1 m	00:00:01	3 kph	212° true
Trackpoint	N51 12.232 E16 59.898	112 m			1 m	00:00:01	3 kph	216° true
Trackpoint	N51 12.232 E16 59.897	111 m			1 m	00:00:01	3 kph	218° true
Trackpoint	N51 12.232 E16 59.897	112 m			1 m	00:00:01	3 kph	222° true
Trackpoint	N51 12.231 E16 59.896	111 m			1 m	00:00:01	3 kph	225° true
Trackpoint	N51 12.231 E16 59.896	112 m			1 m	00:00:01	3 kph	225° true
Trackpoint	N51 12.231 E16 59.895	111 m			1 m	00:00:01	3 kph	227° true
Trackpoint	N51 12.231 E16 59.895	111 m			1 m	00:00:01	3 kph	232° true
Trackpoint	N51 12.230 E16 59.894	111 m			1 m	00:00:01	3 kph	232° true
Trackpoint	N51 12.230 E16 59.894	111 m			1 m	00:00:01	3 kph	232° true
Trackpoint	N51 12.230 E16 59.893	111 m			1 m	00:00:01	3 kph	225° true
Trackpoint	N51 12.229 E16 59.893	111 m			1 m	00:00:01	3 kph	223° true
Trackpoint	N51 12.229 E16 59.892	111 m			1 m	00:00:01	3 kph	222° true
Trackpoint	N51 12.229 E16 59.892	111 m			1 m	00:00:01	3 kph	227° true
Trackpoint	N51 12.229 E16 59.891	111 m			1 m	00:00:01	3 kph	231° true
Trackpoint	N51 12.228 E16 59.890	112 m			1 m	00:00:01	3 kph	230° true
Trackpoint	N51 12.228 E16 59.890	111 m			1 m	00:00:01	3 kph	231° true
Trackpoint	N51 12.228 E16 59.889	111 m			1 m	00:00:01	3 kph	234° true
Trackpoint	N51 12.228 E16 59.889	111 m			1 m	00:00:01	3 kph	248° true
Trackpoint	N51 12.227 E16 59.888	111 m			1 m	00:00:01	3 kph	251° true
Trackpoint	N51 12.227 E16 59.888	111 m			1 m	00:00:01	3 kph	249° true
Trackpoint	N51 12.227 E16 59.887	111 m			1 m	00:00:01	3 kph	250° true
Trackpoint	N51 12.227 E16 59.886	111 m			1 m	00:00:01	3 kph	253° true
Trackpoint	N51 12.227 E16 59.886	111 m			1 m	00:00:01	3 kph	252° true
Trackpoint	N51 12.227 E16 59.885	111 m			1 m	00:00:01	2 kph	259° true
Trackpoint	N51 12.227 E16 59.885	111 m			1 m	00:00:01	3 kph	256° true
Trackpoint	N51 12.227 E16 59.884	111 m			1 m	00:00:01	3 kph	255° true
Trackpoint	N51 12.227 E16 59.883	111 m			1 m	00:00:01	3 kph	258° true
Trackpoint	N51 12.226 E16 59.883	111 m			1 m	00:00:01	3 kph	256° true
Trackpoint	N51 12.226 E16 59.882	111 m			1 m	00:00:01	3 kph	257° true
Trackpoint	N51 12.226 E16 59.881	111 m			1 m	00:00:01	2 kph	265° true
Trackpoint	N51 12.226 E16 59.881	111 m			1 m	00:00:01	3 kph	272° true
Trackpoint	N51 12.226 E16 59.880	111 m			1 m	00:00:01	3 kph	272° true
Trackpoint	N51 12.226 E16 59.879	111 m			1 m	00:00:01	3 kph	271° true
Trackpoint	N51 12.226 E16 59.879	111 m			1 m	00:00:01	3 kph	273° true
Trackpoint	N51 12.226 E16 59.878	111 m			1 m	00:00:01	3 kph	269° true
Trackpoint	N51 12.226 E16 59.877	111 m			1 m	00:00:01	3 kph	261° true
Trackpoint	N51 12.226 E16 59.877	111 m			1 m	00:00:01	3 kph	264° true
Trackpoint	N51 12.226 E16 59.876	111 m			1 m	00:00:01	3 kph	260° true
Trackpoint	N51 12.226 E16 59.875	111 m			1 m	00:00:01	3 kph	255° true
Trackpoint	N51 12.226 E16 59.875	111 m			1 m	00:00:01	3 kph	262° true
Trackpoint	N51 12.226 E16 59.874	111 m			1 m	00:00:01	3 kph	262° true
Trackpoint	N51 12.226 E16 59.873	111 m			1 m	00:00:01	2 kph	265° true
Trackpoint	N51 12.226 E16 59.873	111 m			1 m	00:00:01	3 kph	264° true
Trackpoint	N51 12.226 E16 59.872	111 m			1 m	00:00:01	3 kph	254° true
Trackpoint	N51 12.226 E16 59.872	111 m			1 m	00:00:01	3 kph	257° true
Trackpoint	N51 12.226 E16 59.871	111 m			1 m	00:00:01	3 kph	259° true
Trackpoint	N51 12.226 E16 59.870	111 m			1 m	00:00:01	3 kph	255° true
Trackpoint	N51 12.225 E16 59.870	111 m			1 m	00:00:01	3 kph	257° true
Trackpoint	N51 12.225 E16 59.869	111 m			1 m	00:00:01	3 kph	260° true
Trackpoint	N51 12.225 E16 59.868	111 m			1 m	00:00:01	3 kph	263° true
Trackpoint	N51 12.225 E16 59.868	111 m			1 m	00:00:01	3 kph	264° true
Trackpoint	N51 12.225 E16 59.867	111 m			1 m	00:00:01	3 kph	267° true
Trackpoint	N51 12.225 E16 59.867	111 m			1 m	00:00:01	3 kph	271° true
Trackpoint	N51 12.225 E16 59.866	111 m			1 m	00:00:01	3 kph	272° true
Trackpoint	N51 12.225 E16 59.865	111 m			1 m	00:00:01	3 kph	270° true
Trackpoint	N51 12.225 E16 59.865	111 m			1 m	00:00:01	3 kph	268° true
Trackpoint	N51 12.225 E16 59.864	111 m			1 m	00:00:01	3 kph	277° true
Trackpoint	N51 12.225 E16 59.863	111 m			1 m	00:00:01	3 kph	282° true
Trackpoint	N51 12.225 E16 59.863	111 m			1 m	00:00:01	3 kph	282° true
Trackpoint	N51 12.226 E16 59.862	111 m			1 m	00:00:01	3 kph	287° true
Trackpoint	N51 12.226 E16 59.861	111 m			1 m	00:00:01	3 kph	286° true
Trackpoint	N51 12.226 E16 59.861	111 m			1 m	00:00:01	3 kph	280° true
Trackpoint	N51 12.226 E16 59.860	111 m			1 m	00:00:01	3 kph	280° true
Trackpoint	N51 12.226 E16 59.859	111 m			1 m	00:00:01	3 kph	279° true
Trackpoint	N51 12.226 E16 59.859	111 m			1 m	00:00:01	3 kph	276° true
Trackpoint	N51 12.226 E16 59.858	111 m			1 m	00:00:01	3 kph	272° true
Trackpoint	N51 12.226 E16 59.857	111 m			1 m	00:00:01	3 kph	279° true
Trackpoint	N51 12.226 E16 59.857	111 m			1 m	00:00:01	3 kph	284° true
Trackpoint	N51 12.226 E16 59.856	111 m			1 m	00:00:01	3 kph	280° true
Trackpoint	N51 12.226 E16 59.855	112 m			1 m	00:00:01	3 kph	286° true
Trackpoint	N51 12.227 E16 59.855	111 m			1 m	00:00:01	3 kph	292° true
Trackpoint	N51 12.227 E16 59.854	111 m			1 m	00:00:01	3 kph	293° true
Trackpoint	N51 12.227 E16 59.853	111 m			1 m	00:00:01	3 kph	294° true
Trackpoint	N51 12.227 E16 59.853	111 m			1 m	00:00:01	3 kph	290° true
Trackpoint	N51 12.227 E16 59.852	111 m			1 m	00:00:01	3 kph	284° true
Trackpoint	N51 12.227 E16 59.851	111 m			1 m	00:00:01	3 kph	284° true
Trackpoint	N51 12.227 E16 59.851	111 m			1 m	00:00:01	3 kph	281° true
Trackpoint	N51 12.227 E16 59.850	111 m			1 m	00:00:01	3 kph	291° true
Trackpoint	N51 12.228 E16 59.850	111 m			1 m	00:00:01	3 kph	296° true
Trackpoint	N51 12.228 E16 59.849	111 m			1 m	00:00:01	2 kph	298° true
Trackpoint	N51 12.228 E16 59.849	111 m			1 m	00:00:01	3 kph	298° true
Trackpoint	N51 12.228 E16 59.848	111 m			1 m	00:00:01	3 kph	300° true
Trackpoint	N51 12.228 E16 59.847	111 m			1 m	00:00:01	3 kph	305° true
Trackpoint	N51 12.229 E16 59.847	111 m			1 m	00:00:01	2 kph	305° true
Trackpoint	N51 12.229 E16 59.846	111 m			1 m	00:00:01	2 kph	302° true
Trackpoint	N51 12.229 E16 59.846	111 m			1 m	00:00:01	2 kph	306° true
Trackpoint	N51 12.229 E16 59.846	111 m			1 m	00:00:01	2 kph	306° true
Trackpoint	N51 12.229 E16 59.845	112 m			1 m	00:00:01	3 kph	302° true
Trackpoint	N51 12.230 E16 59.844	111 m			1 m	00:00:01	3 kph	300° true
Trackpoint	N51 12.230 E16 59.844	111 m			1 m	00:00:01	3 kph	303° true
Trackpoint	N51 12.230 E16 59.843	111 m			1 m	00:00:01	3 kph	301° true
Trackpoint	N51 12.230 E16 59.843	111 m			1 m	00:00:01	3 kph	297° true
Trackpoint	N51 12.231 E16 59.842	111 m			1 m	00:00:01	3 kph	298° true
Trackpoint	N51 12.231 E16 59.841	112 m			1 m	00:00:01	3 kph	295° true
Trackpoint	N51 12.231 E16 59.841	111 m			1 m	00:00:01	3 kph	298° true
Trackpoint	N51 12.231 E16 59.840	111 m			1 m	00:00:01	2 kph	300° true
Trackpoint	N51 12.231 E16 59.840	111 m			1 m	00:00:01	3 kph	300° true
Trackpoint	N51 12.232 E16 59.839	111 m			1 m	00:00:01	3 kph	309° true
Trackpoint	N51 12.232 E16 59.839	112 m			1 m	00:00:01	3 kph	307° true
Trackpoint	N51 12.232 E16 59.838	111 m			1 m	00:00:01	3 kph	309° true
Trackpoint	N51 12.232 E16 59.838	112 m			1 m	00:00:01	3 kph	310° true
Trackpoint	N51 12.232 E16 59.837	111 m			1 m	00:00:01	3 kph	307° true
Trackpoint	N51 12.233 E16 59.837	112 m			1 m	00:00:01	3 kph	307° true
Trackpoint	N51 12.233 E16 59.836	112 m			1 m	00:00:01	3 kph	306° true
Trackpoint	N51 12.233 E16 59.836	111 m			1 m	00:00:01	3 kph	312° true
Trackpoint	N51 12.233 E16 59.835	111 m			1 m	00:00:01	3 kph	309° true
Trackpoint	N51 12.234 E16 59.835	112 m			1 m	00:00:01	3 kph	310° true
Trackpoint	N51 12.234 E16 59.834	112 m			1 m	00:00:01	3 kph	312° true
Trackpoint	N51 12.234 E16 59.834	111 m			1 m	00:00:01	3 kph	313° true
Trackpoint	N51 12.235 E16 59.833	111 m			1 m	00:00:01	3 kph	317° true
Trackpoint	N51 12.235 E16 59.833	111 m			1 m	00:00:01	3 kph	313° true
Trackpoint	N51 12.235 E16 59.832	111 m			1 m	00:00:01	3 kph	310° true
Trackpoint	N51 12.235 E16 59.832	111 m			1 m	00:00:01	3 kph	314° true
Trackpoint	N51 12.236 E16 59.832	112 m			1 m	00:00:01	3 kph	314° true
Trackpoint	N51 12.236 E16 59.831	111 m			1 m	00:00:01	3 kph	315° true
Trackpoint	N51 12.236 E16 59.831	111 m			1 m	00:00:01	3 kph	313° true
Trackpoint	N51 12.237 E16 59.830	111 m			1 m	00:00:01	3 kph	312° true
Trackpoint	N51 12.237 E16 59.830	112 m			1 m	00:00:01	3 kph	320° true
Trackpoint	N51 12.237 E16 59.829	111 m			1 m	00:00:01	3 kph	314° true
Trackpoint	N51 12.237 E16 59.829	111 m			1 m	00:00:01	3 kph	302° true
Trackpoint	N51 12.238 E16 59.828	112 m			1 m	00:00:01	3 kph	305° true
Trackpoint	N51 12.238 E16 59.828	112 m			1 m	00:00:01	3 kph	318° true
Trackpoint	N51 12.238 E16 59.827	112 m			1 m	00:00:01	3 kph	327° true
Trackpoint	N51 12.239 E16 59.827	112 m			1 m	00:00:01	3 kph	334° true
Trackpoint	N51 12.239 E16 59.827	112 m			1 m	00:00:01	3 kph	338° true
Trackpoint	N51 12.239 E16 59.827	112 m			1 m	00:00:01	3 kph	332° true
Trackpoint	N51 12.240 E16 59.826	112 m			1 m	00:00:01	3 kph	327° true
Trackpoint	N51 12.240 E16 59.826	112 m			1 m	00:00:01	2 kph	331° true
Trackpoint	N51 12.240 E16 59.826	111 m			1 m	00:00:01	2 kph	332° true
Trackpoint	N51 12.241 E16 59.825	112 m			1 m	00:00:01	2 kph	334° true
Trackpoint	N51 12.241 E16 59.825	112 m			1 m	00:00:01	3 kph	339° true
Trackpoint	N51 12.241 E16 59.825	112 m			1 m	00:00:01	3 kph	341° true
Trackpoint	N51 12.242 E16 59.825	111 m			1 m	00:00:01	3 kph	342° true
Trackpoint	N51 12.242 E16 59.825	112 m			1 m	00:00:01	3 kph	344° true
Trackpoint	N51 12.242 E16 59.825	112 m			1 m	00:00:01	2 kph	351° true
Trackpoint	N51 12.243 E16 59.824	112 m			1 m	00:00:01	3 kph	355° true
Trackpoint	N51 12.243 E16 59.824	112 m			1 m	00:00:01	3 kph	357° true
Trackpoint	N51 12.244 E16 59.824	111 m			1 m	00:00:01	3 kph	358° true
Trackpoint	N51 12.244 E16 59.824	112 m			1 m	00:00:01	2 kph	1° true
Trackpoint	N51 12.244 E16 59.825	111 m			1 m	00:00:01	2 kph	8° true
Trackpoint	N51 12.245 E16 59.825	112 m			1 m	00:00:01	2 kph	10° true
Trackpoint	N51 12.245 E16 59.825	111 m			1 m	00:00:01	3 kph	6° true
Trackpoint	N51 12.246 E16 59.825	111 m			1 m	00:00:01	2 kph	7° true
Trackpoint	N51 12.246 E16 59.825	112 m			1 m	00:00:01	3 kph	9° true
Trackpoint	N51 12.246 E16 59.825	112 m			1 m	00:00:01	2 kph	14° true
Trackpoint	N51 12.247 E16 59.825	112 m			1 m	00:00:01	2 kph	18° true
Trackpoint	N51 12.247 E16 59.825	111 m			1 m	00:00:01	3 kph	14° true
Trackpoint	N51 12.247 E16 59.825	111 m			1 m	00:00:01	3 kph	9° true
Trackpoint	N51 12.248 E16 59.826	111 m			1 m	00:00:01	3 kph	10° true
Trackpoint	N51 12.248 E16 59.826	112 m			1 m	00:00:01	2 kph	23° true
Trackpoint	N51 12.248 E16 59.826	111 m			1 m	00:00:01	3 kph	33° true
Trackpoint	N51 12.249 E16 59.826	111 m			1 m	00:00:01	3 kph	38° true
Trackpoint	N51 12.249 E16 59.827	111 m			1 m	00:00:01	3 kph	44° true
Trackpoint	N51 12.249 E16 59.827	111 m			1 m	00:00:01	3 kph	48° true
Trackpoint	N51 12.250 E16 59.828	111 m			1 m	00:00:01	3 kph	51° true
Trackpoint	N51 12.250 E16 59.828	111 m			1 m	00:00:01	3 kph	56° true
Trackpoint	N51 12.250 E16 59.829	111 m			1 m	00:00:01	3 kph	59° true
Trackpoint	N51 12.250 E16 59.830	111 m			1 m	00:00:01	3 kph	58° true
Trackpoint	N51 12.250 E16 59.830	112 m			1 m	00:00:01	3 kph	58° true
Trackpoint	N51 12.251 E16 59.831	112 m			1 m	00:00:01	3 kph	60° true
Trackpoint	N51 12.251 E16 59.831	112 m			1 m	00:00:01	3 kph	64° true
Trackpoint	N51 12.251 E16 59.832	112 m			1 m	00:00:01	3 kph	68° true
Trackpoint	N51 12.251 E16 59.833	111 m			1 m	00:00:01	3 kph	76° true
Trackpoint	N51 12.251 E16 59.833	112 m			1 m	00:00:01	3 kph	77° true
Trackpoint	N51 12.251 E16 59.834	111 m			1 m	00:00:01	3 kph	79° true
Trackpoint	N51 12.251 E16 59.834	112 m			1 m	00:00:01	2 kph	87° true
Trackpoint	N51 12.251 E16 59.835	112 m			1 m	00:00:01	3 kph	90° true
Trackpoint	N51 12.251 E16 59.836	111 m			1 m	00:00:01	3 kph	97° true
Trackpoint	N51 12.251 E16 59.836	112 m			1 m	00:00:01	3 kph	101° true
Trackpoint	N51 12.251 E16 59.837	112 m			1 m	00:00:01	3 kph	101° true
Trackpoint	N51 12.251 E16 59.837	112 m			1 m	00:00:01	3 kph	104° true
Trackpoint	N51 12.251 E16 59.838	111 m			1 m	00:00:01	3 kph	105° true
Trackpoint	N51 12.251 E16 59.839	111 m			1 m	00:00:01	3 kph	107° true
Trackpoint	N51 12.251 E16 59.839	112 m			1 m	00:00:01	3 kph	111° true
Trackpoint	N51 12.250 E16 59.840	111 m			1 m	00:00:01	3 kph	113° true
Trackpoint	N51 12.250 E16 59.841	112 m			1 m	00:00:01	3 kph	113° true
Trackpoint	N51 12.250 E16 59.841	112 m			1 m	00:00:01	3 kph	117° true
Trackpoint	N51 12.250 E16 59.842	112 m			1 m	00:00:01	3 kph	122° true
Trackpoint	N51 12.250 E16 59.842	112 m			1 m	00:00:01	3 kph	123° true
Trackpoint	N51 12.249 E16 59.843	112 m			1 m	00:00:01	3 kph	122° true
Trackpoint	N51 12.249 E16 59.843	112 m			1 m	00:00:01	3 kph	127° true
Trackpoint	N51 12.249 E16 59.844	111 m			1 m	00:00:01	3 kph	128° true
Trackpoint	N51 12.249 E16 59.844	112 m			1 m	00:00:01	3 kph	130° true
Trackpoint	N51 12.248 E16 59.845	111 m			1 m	00:00:01	3 kph	136° true
Trackpoint	N51 12.248 E16 59.845	111 m			1 m	00:00:01	3 kph	139° true
Trackpoint	N51 12.248 E16 59.846	111 m			1 m	00:00:01	3 kph	138° true
Trackpoint	N51 12.247 E16 59.846	111 m			1 m	00:00:01	3 kph	140° true
Trackpoint	N51 12.247 E16 59.847	111 m			1 m	00:00:01	3 kph	143° true
Trackpoint	N51 12.247 E16 59.847	111 m			1 m	00:00:01	3 kph	143° true
Trackpoint	N51 12.246 E16 59.847	111 m			1 m	00:00:01	3 kph	146° true
Trackpoint	N51 12.246 E16 59.848	111 m			1 m	00:00:01	2 kph	148° true
Trackpoint	N51 12.246 E16 59.848	112 m			1 m	00:00:01	2 kph	154° true
Trackpoint	N51 12.245 E16 59.848	111 m			1 m	00:00:01	3 kph	159° true
Trackpoint	N51 12.245 E16 59.848	111 m			1 m	00:00:01	3 kph	161° true
Trackpoint	N51 12.245 E16 59.849	111 m			1 m	00:00:01	2 kph	161° true
Trackpoint	N51 12.244 E16 59.849	111 m			1 m	00:00:01	3 kph	163° true
Trackpoint	N51 12.244 E16 59.849	111 m			1 m	00:00:01	2 kph	168° true
Trackpoint	N51 12.244 E16 59.849	111 m			1 m	00:00:01	3 kph	167° true
Trackpoint	N51 12.243 E16 59.849	111 m			1 m	00:00:01	3 kph	167° true
Trackpoint	N51 12.243 E16 59.849	111 m			1 m	00:00:01	2 kph	168° true
Trackpoint	N51 12.242 E16 59.849	112 m			1 m	00:00:01	3 kph	172° true
Trackpoint	N51 12.242 E16 59.849	111 m			1 m	00:00:01	3 kph	172° true
Trackpoint	N51 12.242 E16 59.850	111 m			1 m	00:00:01	3 kph	169° true
Trackpoint	N51 12.241 E16 59.850	111 m			1 m	00:00:01	3 kph	166° true
Trackpoint	N51 12.241 E16 59.850	111 m			1 m	00:00:01	3 kph	170° true
Trackpoint	N51 12.240 E16 59.850	111 m			1 m	00:00:01	3 kph	174° true
Trackpoint	N51 12.240 E16 59.850	111 m			1 m	00:00:01	3 kph	180° true
Trackpoint	N51 12.240 E16 59.850	111 m			1 m	00:00:01	3 kph	185° true
Trackpoint	N51 12.239 E16 59.850	112 m			1 m	00:00:01	3 kph	185° true
Trackpoint	N51 12.239 E16 59.850	111 m			1 m	00:00:01	3 kph	189° true
Trackpoint	N51 12.238 E16 59.849	111 m			1 m	00:00:01	3 kph	198° true
Trackpoint	N51 12.238 E16 59.849	112 m			1 m	00:00:01	3 kph	202° true
Trackpoint	N51 12.238 E16 59.849	112 m			1 m	00:00:01	3 kph	197° true
Trackpoint	N51 12.237 E16 59.849	112 m			1 m	00:00:01	3 kph	196° true
Trackpoint	N51 12.237 E16 59.849	111 m			1 m	00:00:01	2 kph	202° true
Trackpoint	N51 12.237 E16 59.848	111 m			1 m	00:00:01	3 kph	197° true
Trackpoint	N51 12.236 E16 59.848	111 m			1 m	00:00:01	3 kph	197° true
Trackpoint	N51 12.236 E16 59.848	111 m			1 m	00:00:01	2 kph	199° true
Trackpoint	N51 12.235 E16 59.848	112 m			1 m	00:00:01	2 kph	203° true
Trackpoint	N51 12.235 E16 59.848	112 m			1 m	00:00:01	3 kph	210° true
Trackpoint	N51 12.235 E16 59.847	112 m			1 m	00:00:01	3 kph	214° true
Trackpoint	N51 12.234 E16 59.847	111 m			1 m	00:00:01	3 kph	220° true
Trackpoint	N51 12.234 E16 59.846	111 m			1 m	00:00:01	3 kph	222° true
Trackpoint	N51 12.234 E16 59.846	111 m			1 m	00:00:01	2 kph	230° true
Trackpoint	N51 12.234 E16 59.845	111 m			1 m	00:00:01	3 kph	236° true
Trackpoint	N51 12.234 E16 59.845	112 m			1 m	00:00:01	3 kph	238° true
Trackpoint	N51 12.233 E16 59.844	112 m			1 m	00:00:01	3 kph	237° true
Trackpoint	N51 12.233 E16 59.844	111 m			1 m	00:00:01	3 kph	235° true
Trackpoint	N51 12.233 E16 59.843	112 m			1 m	00:00:01	2 kph	232° true
Trackpoint	N51 12.233 E16 59.843	111 m			1 m	00:00:01	2 kph	235° true
Trackpoint	N51 12.232 E16 59.842	111 m			1 m	00:00:01	3 kph	237° true
Trackpoint	N51 12.232 E16 59.842	112 m			1 m	00:00:01	3 kph	232° true
Trackpoint	N51 12.232 E16 59.841	112 m			1 m	00:00:01	3 kph	238° true
Trackpoint	N51 12.232 E16 59.841	111 m			1 m	00:00:01	2 kph	249° true

## Sheet: Walking 5
Grid	Szer./dł. hddd°mm.mmm'
Datum	WGS 84
Header	Name	Elapsed Time	Length	Average Speed
Track	Foot-O-W5 (walking 5)	00:05:00	231 m	3 kph
Header	Position	Altitude	Depth	Temperature	Leg Length	Leg Time	Leg Speed	Leg Course
Trackpoint	N51 12.231 E16 59.838	112 m			1 m	00:00:01	4 kph	287° true
Trackpoint	N51 12.232 E16 59.837	111 m			1 m	00:00:01	4 kph	290° true
Trackpoint	N51 12.232 E16 59.836	112 m			1 m	00:00:01	4 kph	287° true
Trackpoint	N51 12.232 E16 59.835	112 m			1 m	00:00:01	4 kph	285° true
Trackpoint	N51 12.232 E16 59.835	112 m			1 m	00:00:01	3 kph	288° true
Trackpoint	N51 12.232 E16 59.834	112 m			1 m	00:00:01	3 kph	287° true
Trackpoint	N51 12.232 E16 59.833	112 m			1 m	00:00:01	3 kph	286° true
Trackpoint	N51 12.233 E16 59.833	112 m			1 m	00:00:01	3 kph	285° true
Trackpoint	N51 12.233 E16 59.832	112 m			1 m	00:00:01	3 kph	284° true
Trackpoint	N51 12.233 E16 59.831	112 m			1 m	00:00:01	3 kph	288° true
Trackpoint	N51 12.233 E16 59.830	112 m			1 m	00:00:01	3 kph	289° true
Trackpoint	N51 12.233 E16 59.830	112 m			1 m	00:00:01	3 kph	284° true
Trackpoint	N51 12.233 E16 59.829	112 m			1 m	00:00:01	3 kph	284° true
Trackpoint	N51 12.233 E16 59.828	112 m			1 m	00:00:01	3 kph	287° true
Trackpoint	N51 12.233 E16 59.828	112 m			1 m	00:00:01	3 kph	288° true
Trackpoint	N51 12.234 E16 59.827	112 m			1 m	00:00:01	3 kph	286° true
Trackpoint	N51 12.234 E16 59.826	112 m			1 m	00:00:01	3 kph	287° true
Trackpoint	N51 12.234 E16 59.826	112 m			1 m	00:00:01	3 kph	285° true
Trackpoint	N51 12.234 E16 59.825	112 m			1 m	00:00:01	3 kph	289° true
Trackpoint	N51 12.234 E16 59.824	112 m			1 m	00:00:01	3 kph	286° true
Trackpoint	N51 12.234 E16 59.824	112 m			1 m	00:00:01	3 kph	286° true
Trackpoint	N51 12.234 E16 59.823	112 m			1 m	00:00:01	3 kph	286° true
Trackpoint	N51 12.234 E16 59.822	112 m			1 m	00:00:01	3 kph	284° true
Trackpoint	N51 12.234 E16 59.822	112 m			1 m	00:00:01	3 kph	288° true
Trackpoint	N51 12.235 E16 59.821	112 m			1 m	00:00:01	3 kph	289° true
Trackpoint	N51 12.235 E16 59.820	112 m			1 m	00:00:01	3 kph	285° true
Trackpoint	N51 12.235 E16 59.820	112 m			1 m	00:00:01	3 kph	287° true
Trackpoint	N51 12.235 E16 59.819	113 m			1 m	00:00:01	3 kph	286° true
Trackpoint	N51 12.235 E16 59.819	112 m			1 m	00:00:01	3 kph	287° true
Trackpoint	N51 12.235 E16 59.818	112 m			1 m	00:00:01	3 kph	290° true
Trackpoint	N51 12.235 E16 59.817	112 m			1 m	00:00:01	3 kph	291° true
Trackpoint	N51 12.236 E16 59.817	112 m			1 m	00:00:01	3 kph	286° true
Trackpoint	N51 12.236 E16 59.816	112 m			1 m	00:00:01	3 kph	284° true
Trackpoint	N51 12.236 E16 59.815	112 m			1 m	00:00:01	3 kph	290° true
Trackpoint	N51 12.236 E16 59.815	112 m			1 m	00:00:01	2 kph	294° true
Trackpoint	N51 12.236 E16 59.814	112 m			1 m	00:00:01	3 kph	295° true
Trackpoint	N51 12.236 E16 59.814	113 m			1 m	00:00:01	3 kph	288° true
Trackpoint	N51 12.236 E16 59.813	112 m			1 m	00:00:01	2 kph	295° true
Trackpoint	N51 12.237 E16 59.813	113 m			1 m	00:00:01	3 kph	301° true
Trackpoint	N51 12.237 E16 59.812	112 m			1 m	00:00:01	3 kph	303° true
Trackpoint	N51 12.237 E16 59.812	113 m			1 m	00:00:01	3 kph	308° true
Trackpoint	N51 12.237 E16 59.811	112 m			1 m	00:00:01	3 kph	306° true
Trackpoint	N51 12.237 E16 59.811	113 m			1 m	00:00:01	3 kph	305° true
Trackpoint	N51 12.238 E16 59.810	112 m			1 m	00:00:01	3 kph	308° true
Trackpoint	N51 12.238 E16 59.810	113 m			1 m	00:00:01	3 kph	310° true
Trackpoint	N51 12.238 E16 59.809	113 m			1 m	00:00:01	2 kph	315° true
Trackpoint	N51 12.239 E16 59.809	112 m			1 m	00:00:01	3 kph	319° true
Trackpoint	N51 12.239 E16 59.808	113 m			1 m	00:00:01	3 kph	317° true
Trackpoint	N51 12.239 E16 59.808	113 m			1 m	00:00:01	3 kph	320° true
Trackpoint	N51 12.240 E16 59.807	112 m			1 m	00:00:01	3 kph	320° true
Trackpoint	N51 12.240 E16 59.807	113 m			1 m	00:00:01	3 kph	319° true
Trackpoint	N51 12.240 E16 59.807	112 m			1 m	00:00:01	3 kph	321° true
Trackpoint	N51 12.241 E16 59.806	113 m			1 m	00:00:01	3 kph	321° true
Trackpoint	N51 12.241 E16 59.806	112 m			1 m	00:00:01	3 kph	319° true
Trackpoint	N51 12.241 E16 59.805	112 m			1 m	00:00:01	3 kph	322° true
Trackpoint	N51 12.241 E16 59.805	112 m			1 m	00:00:01	3 kph	319° true
Trackpoint	N51 12.242 E16 59.804	112 m			1 m	00:00:01	3 kph	320° true
Trackpoint	N51 12.242 E16 59.804	113 m			1 m	00:00:01	3 kph	321° true
Trackpoint	N51 12.242 E16 59.804	112 m			1 m	00:00:01	3 kph	322° true
Trackpoint	N51 12.243 E16 59.803	112 m			1 m	00:00:01	3 kph	334° true
Trackpoint	N51 12.243 E16 59.803	113 m			1 m	00:00:01	2 kph	329° true
Trackpoint	N51 12.243 E16 59.803	113 m			1 m	00:00:01	2 kph	324° true
Trackpoint	N51 12.244 E16 59.802	113 m			1 m	00:00:01	3 kph	335° true
Trackpoint	N51 12.244 E16 59.802	112 m			1 m	00:00:01	3 kph	338° true
Trackpoint	N51 12.244 E16 59.802	112 m			1 m	00:00:01	2 kph	341° true
Trackpoint	N51 12.245 E16 59.802	112 m			1 m	00:00:01	3 kph	343° true
Trackpoint	N51 12.245 E16 59.802	112 m			1 m	00:00:01	3 kph	342° true
Trackpoint	N51 12.246 E16 59.801	112 m			1 m	00:00:01	3 kph	349° true
Trackpoint	N51 12.246 E16 59.801	112 m			1 m	00:00:01	3 kph	347° true
Trackpoint	N51 12.246 E16 59.801	112 m			1 m	00:00:01	3 kph	347° true
Trackpoint	N51 12.247 E16 59.801	112 m			1 m	00:00:01	3 kph	351° true
Trackpoint	N51 12.247 E16 59.801	113 m			1 m	00:00:01	3 kph	346° true
Trackpoint	N51 12.248 E16 59.801	113 m			1 m	00:00:01	3 kph	346° true
Trackpoint	N51 12.248 E16 59.801	113 m			1 m	00:00:01	3 kph	349° true
Trackpoint	N51 12.249 E16 59.800	112 m			1 m	00:00:01	3 kph	348° true
Trackpoint	N51 12.249 E16 59.800	113 m			1 m	00:00:01	3 kph	349° true
Trackpoint	N51 12.249 E16 59.800	112 m			1 m	00:00:01	3 kph	350° true
Trackpoint	N51 12.250 E16 59.800	112 m			1 m	00:00:01	3 kph	353° true
Trackpoint	N51 12.250 E16 59.800	113 m			1 m	00:00:01	3 kph	0° true
Trackpoint	N51 12.251 E16 59.800	112 m			1 m	00:00:01	3 kph	359° true
Trackpoint	N51 12.251 E16 59.800	112 m			1 m	00:00:01	3 kph	1° true
Trackpoint	N51 12.252 E16 59.800	112 m			1 m	00:00:01	3 kph	8° true
Trackpoint	N51 12.252 E16 59.800	112 m			1 m	00:00:01	3 kph	358° true
Trackpoint	N51 12.253 E16 59.800	113 m			1 m	00:00:01	3 kph	358° true
Trackpoint	N51 12.253 E16 59.800	113 m			1 m	00:00:01	3 kph	1° true
Trackpoint	N51 12.253 E16 59.800	113 m			1 m	00:00:01	3 kph	4° true
Trackpoint	N51 12.254 E16 59.800	113 m			1 m	00:00:01	3 kph	14° true
Trackpoint	N51 12.254 E16 59.801	112 m			1 m	00:00:01	3 kph	21° true
Trackpoint	N51 12.255 E16 59.801	113 m			1 m	00:00:01	3 kph	26° true
Trackpoint	N51 12.255 E16 59.801	112 m			1 m	00:00:01	3 kph	29° true
Trackpoint	N51 12.255 E16 59.802	112 m			1 m	00:00:01	3 kph	32° true
Trackpoint	N51 12.256 E16 59.802	113 m			1 m	00:00:01	3 kph	32° true
Trackpoint	N51 12.256 E16 59.802	112 m			1 m	00:00:01	3 kph	39° true
Trackpoint	N51 12.256 E16 59.803	113 m			1 m	00:00:01	3 kph	44° true
Trackpoint	N51 12.257 E16 59.803	113 m			1 m	00:00:01	3 kph	44° true
Trackpoint	N51 12.257 E16 59.804	113 m			1 m	00:00:01	3 kph	47° true
Trackpoint	N51 12.257 E16 59.804	112 m			1 m	00:00:01	3 kph	43° true
Trackpoint	N51 12.258 E16 59.805	113 m			1 m	00:00:01	3 kph	46° true
Trackpoint	N51 12.258 E16 59.805	112 m			1 m	00:00:01	3 kph	54° true
Trackpoint	N51 12.258 E16 59.806	112 m			1 m	00:00:01	3 kph	53° true
Trackpoint	N51 12.258 E16 59.806	112 m			1 m	00:00:01	3 kph	53° true
Trackpoint	N51 12.259 E16 59.807	113 m			1 m	00:00:01	3 kph	56° true
Trackpoint	N51 12.259 E16 59.808	112 m			1 m	00:00:01	3 kph	58° true
Trackpoint	N51 12.259 E16 59.808	113 m			1 m	00:00:01	3 kph	62° true
Trackpoint	N51 12.259 E16 59.809	113 m			1 m	00:00:01	3 kph	61° true
Trackpoint	N51 12.260 E16 59.809	112 m			1 m	00:00:01	3 kph	59° true
Trackpoint	N51 12.260 E16 59.810	112 m			1 m	00:00:01	3 kph	62° true
Trackpoint	N51 12.260 E16 59.811	113 m			1 m	00:00:01	3 kph	60° true
Trackpoint	N51 12.260 E16 59.811	113 m			1 m	00:00:01	3 kph	58° true
Trackpoint	N51 12.260 E16 59.812	113 m			1 m	00:00:01	3 kph	65° true
Trackpoint	N51 12.261 E16 59.813	113 m			1 m	00:00:01	3 kph	66° true
Trackpoint	N51 12.261 E16 59.813	113 m			1 m	00:00:01	3 kph	69° true
Trackpoint	N51 12.261 E16 59.814	113 m			1 m	00:00:01	3 kph	76° true
Trackpoint	N51 12.261 E16 59.815	113 m			1 m	00:00:01	3 kph	72° true
Trackpoint	N51 12.261 E16 59.815	112 m			1 m	00:00:01	3 kph	75° true
Trackpoint	N51 12.261 E16 59.816	113 m			1 m	00:00:01	3 kph	75° true
Trackpoint	N51 12.261 E16 59.817	113 m			1 m	00:00:01	3 kph	82° true
Trackpoint	N51 12.261 E16 59.817	112 m			1 m	00:00:01	3 kph	89° true
Trackpoint	N51 12.261 E16 59.818	112 m			1 m	00:00:01	3 kph	87° true
Trackpoint	N51 12.261 E16 59.818	113 m			1 m	00:00:01	3 kph	89° true
Trackpoint	N51 12.261 E16 59.819	113 m			1 m	00:00:01	3 kph	89° true
Trackpoint	N51 12.261 E16 59.820	113 m			1 m	00:00:01	3 kph	91° true
Trackpoint	N51 12.261 E16 59.821	113 m			1 m	00:00:01	3 kph	94° true
Trackpoint	N51 12.261 E16 59.821	112 m			1 m	00:00:01	3 kph	98° true
Trackpoint	N51 12.261 E16 59.822	113 m			1 m	00:00:01	3 kph	99° true
Trackpoint	N51 12.261 E16 59.823	112 m			1 m	00:00:01	3 kph	97° true
Trackpoint	N51 12.261 E16 59.823	113 m			1 m	00:00:01	3 kph	98° true
Trackpoint	N51 12.261 E16 59.824	113 m			1 m	00:00:01	3 kph	100° true
Trackpoint	N51 12.261 E16 59.825	112 m			1 m	00:00:01	3 kph	106° true
Trackpoint	N51 12.261 E16 59.825	112 m			1 m	00:00:01	3 kph	106° true
Trackpoint	N51 12.261 E16 59.826	113 m			1 m	00:00:01	3 kph	103° true
Trackpoint	N51 12.260 E16 59.827	112 m			1 m	00:00:01	3 kph	102° true
Trackpoint	N51 12.260 E16 59.827	112 m			1 m	00:00:01	3 kph	103° true
Trackpoint	N51 12.260 E16 59.828	113 m			1 m	00:00:01	3 kph	99° true
Trackpoint	N51 12.260 E16 59.829	112 m			1 m	00:00:01	3 kph	99° true
Trackpoint	N51 12.260 E16 59.829	112 m			1 m	00:00:01	3 kph	96° true
Trackpoint	N51 12.260 E16 59.830	113 m			1 m	00:00:01	3 kph	92° true
Trackpoint	N51 12.260 E16 59.831	112 m			1 m	00:00:01	3 kph	92° true
Trackpoint	N51 12.260 E16 59.831	112 m			1 m	00:00:01	3 kph	92° true
Trackpoint	N51 12.260 E16 59.832	113 m			1 m	00:00:01	2 kph	94° true
Trackpoint	N51 12.260 E16 59.833	113 m			1 m	00:00:01	3 kph	93° true
Trackpoint	N51 12.260 E16 59.833	112 m			1 m	00:00:01	3 kph	88° true
Trackpoint	N51 12.260 E16 59.834	112 m			1 m	00:00:01	2 kph	88° true
Trackpoint	N51 12.260 E16 59.834	113 m			1 m	00:00:01	2 kph	90° true
Trackpoint	N51 12.260 E16 59.835	112 m			1 m	00:00:01	2 kph	92° true
Trackpoint	N51 12.260 E16 59.835	113 m			1 m	00:00:01	3 kph	90° true
Trackpoint	N51 12.260 E16 59.836	113 m			1 m	00:00:01	3 kph	92° true
Trackpoint	N51 12.260 E16 59.837	113 m			1 m	00:00:01	3 kph	94° true
Trackpoint	N51 12.260 E16 59.837	113 m			1 m	00:00:01	3 kph	93° true
Trackpoint	N51 12.260 E16 59.838	112 m			1 m	00:00:01	2 kph	92° true
Trackpoint	N51 12.260 E16 59.839	113 m			1 m	00:00:01	3 kph	92° true
Trackpoint	N51 12.260 E16 59.839	113 m			1 m	00:00:01	3 kph	91° true
Trackpoint	N51 12.260 E16 59.840	112 m			1 m	00:00:01	2 kph	90° true
Trackpoint	N51 12.260 E16 59.840	113 m			1 m	00:00:01	2 kph	92° true
Trackpoint	N51 12.260 E16 59.841	113 m			1 m	00:00:01	2 kph	94° true
Trackpoint	N51 12.260 E16 59.842	113 m			1 m	00:00:01	3 kph	93° true
Trackpoint	N51 12.260 E16 59.842	113 m			1 m	00:00:01	3 kph	92° true
Trackpoint	N51 12.260 E16 59.843	113 m			1 m	00:00:01	3 kph	91° true
Trackpoint	N51 12.260 E16 59.844	113 m			1 m	00:00:01	3 kph	90° true
Trackpoint	N51 12.260 E16 59.844	112 m			1 m	00:00:01	3 kph	92° true
Trackpoint	N51 12.260 E16 59.845	112 m			1 m	00:00:01	3 kph	88° true
Trackpoint	N51 12.260 E16 59.846	113 m			1 m	00:00:01	3 kph	88° true
Trackpoint	N51 12.260 E16 59.846	113 m			1 m	00:00:01	2 kph	90° true
Trackpoint	N51 12.260 E16 59.847	113 m			1 m	00:00:01	3 kph	96° true
Trackpoint	N51 12.260 E16 59.847	113 m			1 m	00:00:01	3 kph	95° true
Trackpoint	N51 12.260 E16 59.848	112 m			1 m	00:00:01	3 kph	97° true
Trackpoint	N51 12.260 E16 59.849	113 m			1 m	00:00:01	3 kph	95° true
Trackpoint	N51 12.260 E16 59.849	113 m			1 m	00:00:01	3 kph	95° true
Trackpoint	N51 12.260 E16 59.850	112 m			1 m	00:00:01	3 kph	99° true
Trackpoint	N51 12.260 E16 59.851	113 m			1 m	00:00:01	3 kph	100° true
Trackpoint	N51 12.260 E16 59.851	113 m			1 m	00:00:01	3 kph	102° true
Trackpoint	N51 12.259 E16 59.852	113 m			1 m	00:00:01	3 kph	96° true
Trackpoint	N51 12.259 E16 59.852	113 m			1 m	00:00:01	3 kph	98° true
Trackpoint	N51 12.259 E16 59.853	113 m			1 m	00:00:01	3 kph	101° true
Trackpoint	N51 12.259 E16 59.854	113 m			1 m	00:00:01	3 kph	99° true
Trackpoint	N51 12.259 E16 59.854	113 m			1 m	00:00:01	3 kph	99° true
Trackpoint	N51 12.259 E16 59.855	113 m			1 m	00:00:01	3 kph	101° true
Trackpoint	N51 12.259 E16 59.856	113 m			1 m	00:00:01	3 kph	99° true
Trackpoint	N51 12.259 E16 59.856	113 m			1 m	00:00:01	3 kph	102° true
Trackpoint	N51 12.259 E16 59.857	112 m			1 m	00:00:01	3 kph	102° true
Trackpoint	N51 12.259 E16 59.858	112 m			1 m	00:00:01	3 kph	99° true
Trackpoint	N51 12.259 E16 59.858	112 m			1 m	00:00:01	3 kph	97° true
Trackpoint	N51 12.259 E16 59.859	112 m			1 m	00:00:01	3 kph	96° true
Trackpoint	N51 12.259 E16 59.859	113 m			1 m	00:00:01	2 kph	99° true
Trackpoint	N51 12.259 E16 59.860	113 m			1 m	00:00:01	2 kph	98° true
Trackpoint	N51 12.259 E16 59.861	112 m			1 m	00:00:01	2 kph	94° true
Trackpoint	N51 12.259 E16 59.861	113 m			1 m	00:00:01	2 kph	102° true
Trackpoint	N51 12.258 E16 59.862	113 m			1 m	00:00:01	3 kph	101° true
Trackpoint	N51 12.258 E16 59.862	112 m			1 m	00:00:01	3 kph	104° true
Trackpoint	N51 12.258 E16 59.863	112 m			1 m	00:00:01	3 kph	101° true
Trackpoint	N51 12.258 E16 59.864	112 m			1 m	00:00:01	3 kph	102° true
Trackpoint	N51 12.258 E16 59.864	112 m			1 m	00:00:01	3 kph	105° true
Trackpoint	N51 12.258 E16 59.865	112 m			1 m	00:00:01	3 kph	104° true
Trackpoint	N51 12.258 E16 59.865	113 m			1 m	00:00:01	3 kph	106° true
Trackpoint	N51 12.258 E16 59.866	113 m			1 m	00:00:01	3 kph	104° true
Trackpoint	N51 12.258 E16 59.866	112 m			1 m	00:00:01	2 kph	100° true
Trackpoint	N51 12.258 E16 59.867	112 m			1 m	00:00:01	2 kph	100° true
Trackpoint	N51 12.258 E16 59.868	113 m			1 m	00:00:01	3 kph	104° true
Trackpoint	N51 12.257 E16 59.868	113 m			1 m	00:00:01	3 kph	111° true
Trackpoint	N51 12.257 E16 59.869	113 m			1 m	00:00:01	3 kph	112° true
Trackpoint	N51 12.257 E16 59.869	113 m			1 m	00:00:01	3 kph	110° true
Trackpoint	N51 12.257 E16 59.870	112 m			1 m	00:00:01	3 kph	110° true
Trackpoint	N51 12.257 E16 59.871	113 m			1 m	00:00:01	3 kph	109° true
Trackpoint	N51 12.257 E16 59.871	112 m			1 m	00:00:01	2 kph	104° true
Trackpoint	N51 12.257 E16 59.872	113 m			1 m	00:00:01	2 kph	102° true
Trackpoint	N51 12.257 E16 59.872	112 m			1 m	00:00:01	2 kph	106° true
Trackpoint	N51 12.257 E16 59.873	112 m			1 m	00:00:01	2 kph	107° true
Trackpoint	N51 12.256 E16 59.873	113 m			1 m	00:00:01	2 kph	107° true
Trackpoint	N51 12.256 E16 59.874	112 m			1 m	00:00:01	3 kph	107° true
Trackpoint	N51 12.256 E16 59.875	113 m			1 m	00:00:01	3 kph	104° true
Trackpoint	N51 12.256 E16 59.875	113 m			1 m	00:00:01	3 kph	105° true
Trackpoint	N51 12.256 E16 59.876	112 m			1 m	00:00:01	3 kph	104° true
Trackpoint	N51 12.256 E16 59.877	113 m			1 m	00:00:01	3 kph	99° true
Trackpoint	N51 12.256 E16 59.877	112 m			1 m	00:00:01	3 kph	98° true
Trackpoint	N51 12.256 E16 59.878	113 m			1 m	00:00:01	3 kph	101° true
Trackpoint	N51 12.256 E16 59.879	113 m			1 m	00:00:01	3 kph	101° true
Trackpoint	N51 12.256 E16 59.879	112 m			1 m	00:00:01	3 kph	102° true
Trackpoint	N51 12.256 E16 59.880	113 m			1 m	00:00:01	3 kph	101° true
Trackpoint	N51 12.255 E16 59.880	113 m			1 m	00:00:01	3 kph	104° true
Trackpoint	N51 12.255 E16 59.881	113 m			1 m	00:00:01	3 kph	99° true
Trackpoint	N51 12.255 E16 59.882	113 m			1 m	00:00:01	3 kph	96° true
Trackpoint	N51 12.255 E16 59.882	113 m			1 m	00:00:01	3 kph	99° true
Trackpoint	N51 12.255 E16 59.883	113 m			1 m	00:00:01	3 kph	98° true
Trackpoint	N51 12.255 E16 59.884	112 m			1 m	00:00:01	3 kph	93° true
Trackpoint	N51 12.255 E16 59.884	113 m			1 m	00:00:01	3 kph	89° true
Trackpoint	N51 12.255 E16 59.885	112 m			1 m	00:00:01	3 kph	84° true
Trackpoint	N51 12.255 E16 59.886	113 m			1 m	00:00:01	3 kph	95° true
Trackpoint	N51 12.255 E16 59.886	113 m			1 m	00:00:01	3 kph	98° true
Trackpoint	N51 12.255 E16 59.887	113 m			1 m	00:00:01	3 kph	92° true
Trackpoint	N51 12.255 E16 59.888	112 m			1 m	00:00:01	3 kph	93° true
Trackpoint	N51 12.255 E16 59.888	113 m			1 m	00:00:01	3 kph	94° true
Trackpoint	N51 12.255 E16 59.889	113 m			1 m	00:00:01	3 kph	96° true
Trackpoint	N51 12.255 E16 59.889	112 m			1 m	00:00:01	3 kph	94° true
Trackpoint	N51 12.255 E16 59.890	113 m			1 m	00:00:01	3 kph	93° true
Trackpoint	N51 12.255 E16 59.891	112 m			1 m	00:00:01	3 kph	95° true
Trackpoint	N51 12.255 E16 59.891	113 m			1 m	00:00:01	3 kph	86° true
Trackpoint	N51 12.255 E16 59.892	113 m			1 m	00:00:01	3 kph	89° true
Trackpoint	N51 12.255 E16 59.893	112 m			1 m	00:00:01	3 kph	93° true
Trackpoint	N51 12.255 E16 59.893	113 m			1 m	00:00:01	3 kph	91° true
Trackpoint	N51 12.255 E16 59.894	113 m			1 m	00:00:01	3 kph	92° true
Trackpoint	N51 12.255 E16 59.895	113 m			1 m	00:00:01	3 kph	94° true
Trackpoint	N51 12.255 E16 59.896	113 m			1 m	00:00:01	3 kph	88° true
Trackpoint	N51 12.255 E16 59.896	113 m			1 m	00:00:01	3 kph	85° true
Trackpoint	N51 12.255 E16 59.897	113 m			1 m	00:00:01	3 kph	83° true
Trackpoint	N51 12.255 E16 59.898	113 m			1 m	00:00:01	2 kph	88° true
Trackpoint	N51 12.255 E16 59.898	113 m			1 m	00:00:01	3 kph	95° true
Trackpoint	N51 12.255 E16 59.899	113 m			1 m	00:00:01	3 kph	96° true
Trackpoint	N51 12.255 E16 59.899	113 m			1 m	00:00:01	3 kph	99° true
Trackpoint	N51 12.255 E16 59.900	113 m			1 m	00:00:01	3 kph	98° true
Trackpoint	N51 12.255 E16 59.901	113 m			1 m	00:00:01	3 kph	95° true
Trackpoint	N51 12.255 E16 59.901	113 m			1 m	00:00:01	3 kph	98° true
Trackpoint	N51 12.255 E16 59.902	113 m			1 m	00:00:01	3 kph	104° true
Trackpoint	N51 12.255 E16 59.903	113 m			1 m	00:00:01	3 kph	104° true
Trackpoint	N51 12.254 E16 59.903	112 m			1 m	00:00:01	3 kph	100° true
Trackpoint	N51 12.254 E16 59.904	113 m			1 m	00:00:01	3 kph	96° true
Trackpoint	N51 12.254 E16 59.905	113 m			1 m	00:00:01	3 kph	94° true
Trackpoint	N51 12.254 E16 59.906	113 m			1 m	00:00:01	3 kph	94° true
Trackpoint	N51 12.254 E16 59.906	112 m			1 m	00:00:01	3 kph	96° true
Trackpoint	N51 12.254 E16 59.907	113 m			1 m	00:00:01	3 kph	94° true
Trackpoint	N51 12.254 E16 59.908	113 m			1 m	00:00:01	3 kph	94° true
Trackpoint	N51 12.254 E16 59.908	113 m			1 m	00:00:01	3 kph	98° true
Trackpoint	N51 12.254 E16 59.909	112 m			1 m	00:00:01	3 kph	98° true
Trackpoint	N51 12.254 E16 59.910	113 m			1 m	00:00:01	3 kph	100° true
Trackpoint	N51 12.254 E16 59.910	113 m			1 m	00:00:01	3 kph	98° true
Trackpoint	N51 12.254 E16 59.911	112 m			1 m	00:00:01	3 kph	98° true
Trackpoint	N51 12.254 E16 59.912	113 m			1 m	00:00:01	3 kph	98° true
Trackpoint	N51 12.254 E16 59.912	113 m			1 m	00:00:01	3 kph	100° true
Trackpoint	N51 12.254 E16 59.913	113 m			1 m	00:00:01	3 kph	99° true
Trackpoint	N51 12.254 E16 59.914	113 m			1 m	00:00:01	3 kph	101° true
Trackpoint	N51 12.254 E16 59.914	113 m			1 m	00:00:01	3 kph	105° true
Trackpoint	N51 12.253 E16 59.915	113 m			1 m	00:00:01	3 kph	108° true
Trackpoint	N51 12.253 E16 59.915	113 m			1 m	00:00:01	3 kph	112° true
Trackpoint	N51 12.253 E16 59.916	113 m			1 m	00:00:01	3 kph	108° true
Trackpoint	N51 12.253 E16 59.917	113 m			1 m	00:00:01	3 kph	107° true
Trackpoint	N51 12.253 E16 59.917	113 m			1 m	00:00:01	3 kph	113° true
Trackpoint	N51 12.253 E16 59.918	113 m			1 m	00:00:01	3 kph	117° true
Trackpoint	N51 12.253 E16 59.918	113 m			1 m	00:00:01	3 kph	116° true
Trackpoint	N51 12.252 E16 59.919	113 m			1 m	00:00:01	3 kph	124° true
Trackpoint	N51 12.252 E16 59.919	113 m			1 m	00:00:01	3 kph	129° true
Trackpoint	N51 12.252 E16 59.920	113 m			1 m	00:00:01	3 kph	129° true
Trackpoint	N51 12.252 E16 59.920	113 m			1 m	00:00:01	3 kph	129° true
Trackpoint	N51 12.251 E16 59.921	113 m			1 m	00:00:01	3 kph	136° true
Trackpoint	N51 12.251 E16 59.921	113 m			1 m	00:00:01	3 kph	141° true
Trackpoint	N51 12.251 E16 59.922	113 m			1 m	00:00:01	3 kph	137° true
Trackpoint	N51 12.250 E16 59.922	113 m			1 m	00:00:01	3 kph	135° true
Trackpoint	N51 12.250 E16 59.923	113 m			1 m	00:00:01	3 kph	133° true
Trackpoint	N51 12.250 E16 59.923	113 m			1 m	00:00:01	3 kph	137° true
Trackpoint	N51 12.249 E16 59.924	112 m			1 m	00:00:01	3 kph	138° true
Trackpoint	N51 12.249 E16 59.924	113 m			1 m	00:00:01	3 kph	139° true
Trackpoint	N51 12.249 E16 59.924	113 m			1 m	00:00:01	3 kph	142° true
Trackpoint	N51 12.249 E16 59.925	113 m			1 m	00:00:01	3 kph	145° true
Trackpoint	N51 12.248 E16 59.925	113 m			1 m	00:00:01	3 kph	148° true
Trackpoint	N51 12.248 E16 59.925	113 m			1 m	00:00:01	2 kph	151° true
Trackpoint	N51 12.248 E16 59.926	113 m			1 m	00:00:01	2 kph	151° true
Trackpoint	N51 12.247 E16 59.926	112 m			1 m	00:00:01	3 kph	153° true
Trackpoint	N51 12.247 E16 59.926	113 m			1 m	00:00:01	3 kph	152° true
Trackpoint	N51 12.247 E16 59.926	113 m			1 m	00:00:01	2 kph	158° true
Trackpoint	N51 12.246 E16 59.927	112 m			1 m	00:00:01	3 kph	160° true
Trackpoint	N51 12.246 E16 59.927	113 m			1 m	00:00:01	3 kph	159° true

## Sheet: Running
Grid	Szer./dł. hddd°mm.mmm'
Datum	WGS 84
Header	Name	Elapsed Time	Length	Average Speed
Track	Foot-O-W5 (running)	00:02:00	178 m	5 kph
Header	Position	Altitude	Depth	Temperature	Leg Length	Leg Time	Leg Speed	Leg Course
Trackpoint	N51 12.177 E16 59.876	111 m			1 m	00:00:01	3 kph	7° true
Trackpoint	N51 12.178 E16 59.876	110 m			1 m	00:00:01	5 kph	359° true
Trackpoint	N51 12.178 E16 59.876	111 m			2 m	00:00:01	6 kph	357° true
Trackpoint	N51 12.179 E16 59.875	111 m			2 m	00:00:01	6 kph	350° true
Trackpoint	N51 12.180 E16 59.875	111 m			2 m	00:00:01	6 kph	345° true
Trackpoint	N51 12.181 E16 59.875	111 m			2 m	00:00:01	6 kph	346° true
Trackpoint	N51 12.182 E16 59.874	111 m			2 m	00:00:01	6 kph	350° true
Trackpoint	N51 12.183 E16 59.874	111 m			2 m	00:00:01	6 kph	349° true
Trackpoint	N51 12.184 E16 59.874	111 m			2 m	00:00:01	6 kph	349° true
Trackpoint	N51 12.185 E16 59.874	111 m			2 m	00:00:01	6 kph	349° true
Trackpoint	N51 12.185 E16 59.873	111 m			2 m	00:00:01	6 kph	348° true
Trackpoint	N51 12.186 E16 59.873	111 m			2 m	00:00:01	6 kph	345° true
Trackpoint	N51 12.187 E16 59.872	111 m			2 m	00:00:01	6 kph	341° true
Trackpoint	N51 12.188 E16 59.872	111 m			2 m	00:00:01	6 kph	341° true
Trackpoint	N51 12.189 E16 59.871	111 m			2 m	00:00:01	6 kph	340° true
Trackpoint	N51 12.190 E16 59.871	111 m			2 m	00:00:01	6 kph	338° true
Trackpoint	N51 12.191 E16 59.870	112 m			2 m	00:00:01	6 kph	333° true
Trackpoint	N51 12.191 E16 59.870	111 m			2 m	00:00:01	6 kph	336° true
Trackpoint	N51 12.192 E16 59.869	111 m			2 m	00:00:01	6 kph	334° true
Trackpoint	N51 12.193 E16 59.868	112 m			2 m	00:00:01	6 kph	331° true
Trackpoint	N51 12.194 E16 59.867	112 m			2 m	00:00:01	6 kph	325° true
Trackpoint	N51 12.195 E16 59.867	112 m			2 m	00:00:01	6 kph	323° true
Trackpoint	N51 12.195 E16 59.866	112 m			2 m	00:00:01	6 kph	321° true
Trackpoint	N51 12.196 E16 59.865	111 m			2 m	00:00:01	6 kph	319° true
Trackpoint	N51 12.197 E16 59.864	112 m			2 m	00:00:01	6 kph	318° true
Trackpoint	N51 12.197 E16 59.863	112 m			2 m	00:00:01	6 kph	316° true
Trackpoint	N51 12.198 E16 59.862	112 m			2 m	00:00:01	6 kph	315° true
Trackpoint	N51 12.199 E16 59.860	112 m			2 m	00:00:01	7 kph	310° true
Trackpoint	N51 12.199 E16 59.859	111 m			2 m	00:00:01	7 kph	307° true
Trackpoint	N51 12.200 E16 59.858	112 m			2 m	00:00:01	6 kph	303° true
Trackpoint	N51 12.200 E16 59.857	112 m			2 m	00:00:01	6 kph	300° true
Trackpoint	N51 12.201 E16 59.855	112 m			2 m	00:00:01	6 kph	298° true
Trackpoint	N51 12.201 E16 59.854	112 m			2 m	00:00:01	6 kph	299° true
Trackpoint	N51 12.201 E16 59.853	112 m			2 m	00:00:01	6 kph	300° true
Trackpoint	N51 12.202 E16 59.852	112 m			2 m	00:00:01	6 kph	303° true
Trackpoint	N51 12.203 E16 59.851	112 m			2 m	00:00:01	6 kph	311° true
Trackpoint	N51 12.203 E16 59.850	112 m			2 m	00:00:01	6 kph	317° true
Trackpoint	N51 12.204 E16 59.849	112 m			2 m	00:00:01	6 kph	322° true
Trackpoint	N51 12.204 E16 59.848	112 m			2 m	00:00:01	6 kph	322° true
Trackpoint	N51 12.205 E16 59.847	112 m			2 m	00:00:01	6 kph	324° true
Trackpoint	N51 12.206 E16 59.846	112 m			2 m	00:00:01	6 kph	327° true
Trackpoint	N51 12.207 E16 59.846	112 m			2 m	00:00:01	6 kph	332° true
Trackpoint	N51 12.207 E16 59.845	112 m			2 m	00:00:01	5 kph	340° true
Trackpoint	N51 12.208 E16 59.845	112 m			1 m	00:00:01	5 kph	350° true
Trackpoint	N51 12.209 E16 59.845	112 m			1 m	00:00:01	5 kph	2° true
Trackpoint	N51 12.210 E16 59.845	111 m			2 m	00:00:01	6 kph	13° true
Trackpoint	N51 12.211 E16 59.846	112 m			2 m	00:00:01	6 kph	13° true
Trackpoint	N51 12.212 E16 59.846	111 m			2 m	00:00:01	6 kph	10° true
Trackpoint	N51 12.212 E16 59.846	112 m			2 m	00:00:01	6 kph	14° true
Trackpoint	N51 12.213 E16 59.847	112 m			2 m	00:00:01	6 kph	21° true
Trackpoint	N51 12.214 E16 59.847	111 m			2 m	00:00:01	6 kph	24° true
Trackpoint	N51 12.215 E16 59.848	112 m			2 m	00:00:01	5 kph	26° true
Trackpoint	N51 12.215 E16 59.849	112 m			2 m	00:00:01	6 kph	29° true
Trackpoint	N51 12.216 E16 59.849	111 m			2 m	00:00:01	6 kph	35° true
Trackpoint	N51 12.217 E16 59.850	112 m			2 m	00:00:01	6 kph	39° true
Trackpoint	N51 12.217 E16 59.851	112 m			2 m	00:00:01	6 kph	48° true
Trackpoint	N51 12.218 E16 59.852	112 m			2 m	00:00:01	6 kph	55° true
Trackpoint	N51 12.218 E16 59.854	112 m			2 m	00:00:01	6 kph	64° true
Trackpoint	N51 12.218 E16 59.855	112 m			2 m	00:00:01	6 kph	78° true
Trackpoint	N51 12.218 E16 59.856	111 m			2 m	00:00:01	6 kph	96° true
Trackpoint	N51 12.218 E16 59.858	111 m			2 m	00:00:01	6 kph	103° true
Trackpoint	N51 12.218 E16 59.859	111 m			2 m	00:00:01	6 kph	101° true
Trackpoint	N51 12.218 E16 59.860	111 m			2 m	00:00:01	6 kph	95° true
Trackpoint	N51 12.218 E16 59.862	112 m			2 m	00:00:01	5 kph	97° true
Trackpoint	N51 12.218 E16 59.863	111 m			1 m	00:00:01	5 kph	105° true
Trackpoint	N51 12.217 E16 59.864	112 m			1 m	00:00:01	5 kph	113° true
Trackpoint	N51 12.217 E16 59.865	112 m			2 m	00:00:01	6 kph	119° true
Trackpoint	N51 12.216 E16 59.866	111 m			2 m	00:00:01	6 kph	126° true
Trackpoint	N51 12.216 E16 59.867	111 m			2 m	00:00:01	5 kph	135° true
Trackpoint	N51 12.215 E16 59.868	112 m			1 m	00:00:01	5 kph	151° true
Trackpoint	N51 12.214 E16 59.869	112 m			2 m	00:00:01	6 kph	157° true
Trackpoint	N51 12.214 E16 59.869	112 m			2 m	00:00:01	6 kph	155° true
Trackpoint	N51 12.213 E16 59.870	111 m			2 m	00:00:01	6 kph	154° true
Trackpoint	N51 12.212 E16 59.870	111 m			2 m	00:00:01	6 kph	157° true
Trackpoint	N51 12.211 E16 59.871	112 m			2 m	00:00:01	6 kph	161° true
Trackpoint	N51 12.210 E16 59.871	112 m			2 m	00:00:01	6 kph	169° true
Trackpoint	N51 12.210 E16 59.871	112 m			1 m	00:00:01	5 kph	174° true
Trackpoint	N51 12.209 E16 59.871	112 m			2 m	00:00:01	6 kph	174° true
Trackpoint	N51 12.208 E16 59.871	112 m			2 m	00:00:01	6 kph	170° true
Trackpoint	N51 12.207 E16 59.872	111 m			2 m	00:00:01	6 kph	167° true
Trackpoint	N51 12.206 E16 59.872	112 m			2 m	00:00:01	6 kph	164° true
Trackpoint	N51 12.205 E16 59.873	111 m			2 m	00:00:01	6 kph	165° true
Trackpoint	N51 12.204 E16 59.873	112 m			2 m	00:00:01	6 kph	175° true
Trackpoint	N51 12.204 E16 59.873	111 m			2 m	00:00:01	6 kph	178° true
Trackpoint	N51 12.203 E16 59.873	111 m			2 m	00:00:01	6 kph	181° true
Trackpoint	N51 12.202 E16 59.873	111 m			2 m	00:00:01	6 kph	181° true
Trackpoint	N51 12.201 E16 59.873	111 m			2 m	00:00:01	6 kph	181° true
Trackpoint	N51 12.200 E16 59.873	111 m			2 m	00:00:01	6 kph	183° true
Trackpoint	N51 12.199 E16 59.873	112 m			2 m	00:00:01	6 kph	182° true
Trackpoint	N51 12.199 E16 59.872	111 m			2 m	00:00:01	5 kph	184° true
Trackpoint	N51 12.198 E16 59.872	111 m			2 m	00:00:01	6 kph	186° true
Trackpoint	N51 12.197 E16 59.872	111 m			2 m	00:00:01	6 kph	192° true
Trackpoint	N51 12.196 E16 59.872	111 m			2 m	00:00:01	6 kph	197° true
Trackpoint	N51 12.195 E16 59.871	111 m			2 m	00:00:01	6 kph	200° true
Trackpoint	N51 12.194 E16 59.870	111 m			2 m	00:00:01	7 kph	203° true
Trackpoint	N51 12.193 E16 59.870	111 m			2 m	00:00:01	6 kph	206° true
Trackpoint	N51 12.192 E16 59.869	111 m			2 m	00:00:01	6 kph	208° true
Trackpoint	N51 12.192 E16 59.868	112 m			2 m	00:00:01	6 kph	209° true
Trackpoint	N51 12.191 E16 59.868	111 m			2 m	00:00:01	6 kph	213° true
Trackpoint	N51 12.190 E16 59.867	111 m			2 m	00:00:01	6 kph	220° true
Trackpoint	N51 12.190 E16 59.866	111 m			2 m	00:00:01	6 kph	224° true
Trackpoint	N51 12.189 E16 59.865	111 m			2 m	00:00:01	6 kph	227° true
Trackpoint	N51 12.188 E16 59.863	111 m			2 m	00:00:01	6 kph	230° true
Trackpoint	N51 12.188 E16 59.862	111 m			2 m	00:00:01	6 kph	233° true
Trackpoint	N51 12.187 E16 59.861	111 m			2 m	00:00:01	6 kph	235° true
Trackpoint	N51 12.187 E16 59.860	111 m			2 m	00:00:01	6 kph	236° true
Trackpoint	N51 12.186 E16 59.859	111 m			1 m	00:00:01	5 kph	240° true
Trackpoint	N51 12.186 E16 59.858	111 m			2 m	00:00:01	6 kph	242° true
Trackpoint	N51 12.186 E16 59.857	110 m			1 m	00:00:01	5 kph	240° true
Trackpoint	N51 12.185 E16 59.856	111 m			1 m	00:00:01	2 kph	239° true

## Sheet: Coordinates
Geo-coordinates 1 (walking 1)						Geo-coordinates 2 (walking 2)						Geo-coordinates 3 (walking 3)						Geo-coordinates 4 (walking 4)						Geo-coordinates 5 (walking 5)						Geo-coordinates (running)								Geo-coordinate, East, North, expressed in degrees, presented in decimal	East 1 (walking 1)	North 1 (walking 1)	East 2 (walking 2)	North 2 (walking 2)	East 3 (walking 3)	North 3 (walking 3)	East 4 (walking 4)	North 4 (walking 4)	East 5 (walking 5)	North 5 (walking 5)	East Running
				N	E					N	E					N	E					N	E					N	E					N	E				16.9984	51.204	16.9987	51.2036	16.9981	51.2037	16.9984	51.2043	16.9973	51.2039	16.9979
N51	12.241	E16	59.903	51.204	16.9984	N51	12.214	E16	59.921	51.2036	16.9987	N51	12.22	E16	59.886	51.2037	16.9981	N51	12.259	E16	59.904	51.2043	16.9984	N51	12.231	E16	59.838	51.2039	16.9973	N51	12.177	E16	59.876	51.203	16.9979				16.9984	51.204	16.9987	51.2036	16.9981	51.2037	16.9984	51.2043	16.9973	51.2039	16.9979
N51	12.241	E16	59.904	51.204	16.9984	N51	12.214	E16	59.92	51.2036	16.9987	N51	12.221	E16	59.885	51.2037	16.9981	N51	12.258	E16	59.904	51.2043	16.9984	N51	12.232	E16	59.837	51.2039	16.9973	N51	12.178	E16	59.876	51.203	16.9979				16.9984	51.204	16.9987	51.2035	16.9981	51.2037	16.9984	51.2043	16.9973	51.2039	16.9979
N51	12.241	E16	59.905	51.204	16.9984	N51	12.213	E16	59.919	51.2035	16.9987	N51	12.221	E16	59.885	51.2037	16.9981	N51	12.257	E16	59.905	51.2043	16.9984	N51	12.232	E16	59.836	51.2039	16.9973	N51	12.178	E16	59.876	51.203	16.9979				16.9984	51.204	16.9986	51.2035	16.9981	51.2037	16.9984	51.2043	16.9973	51.2039	16.9979
N51	12.241	E16	59.906	51.204	16.9984	N51	12.213	E16	59.918	51.2035	16.9986	N51	12.222	E16	59.885	51.2037	16.9981	N51	12.257	E16	59.905	51.2043	16.9984	N51	12.232	E16	59.835	51.2039	16.9973	N51	12.179	E16	59.875	51.203	16.9979				16.9984	51.204	16.9986	51.2035	16.9981	51.2037	16.9984	51.2043	16.9973	51.2039	16.9979
N51	12.241	E16	59.907	51.204	16.9984	N51	12.213	E16	59.918	51.2035	16.9986	N51	12.222	E16	59.884	51.2037	16.9981	N51	12.256	E16	59.905	51.2043	16.9984	N51	12.232	E16	59.835	51.2039	16.9973	N51	12.18	E16	59.875	51.203	16.9979				16.9985	51.204	16.9986	51.2035	16.9981	51.2037	16.9984	51.2043	16.9972	51.2039	16.9979
N51	12.24	E16	59.908	51.204	16.9985	N51	12.212	E16	59.917	51.2035	16.9986	N51	12.223	E16	59.884	51.2037	16.9981	N51	12.256	E16	59.905	51.2043	16.9984	N51	12.232	E16	59.834	51.2039	16.9972	N51	12.181	E16	59.875	51.203	16.9979				16.9985	51.204	16.9986	51.2035	16.9981	51.2037	16.9984	51.2043	16.9972	51.2039	16.9979
N51	12.24	E16	59.909	51.204	16.9985	N51	12.212	E16	59.916	51.2035	16.9986	N51	12.224	E16	59.884	51.2037	16.9981	N51	12.255	E16	59.905	51.2043	16.9984	N51	12.232	E16	59.833	51.2039	16.9972	N51	12.182	E16	59.874	51.203	16.9979				16.9985	51.204	16.9986	51.2035	16.998	51.2037	16.9984	51.2043	16.9972	51.2039	16.9979
N51	12.24	E16	59.91	51.204	16.9985	N51	12.212	E16	59.915	51.2035	16.9986	N51	12.224	E16	59.883	51.2037	16.998	N51	12.255	E16	59.906	51.2043	16.9984	N51	12.233	E16	59.833	51.2039	16.9972	N51	12.183	E16	59.874	51.203	16.9979				16.9985	51.204	16.9986	51.2035	16.998	51.2037	16.9984	51.2042	16.9972	51.2039	16.9979
N51	12.24	E16	59.911	51.204	16.9985	N51	12.211	E16	59.915	51.2035	16.9986	N51	12.225	E16	59.883	51.2037	16.998	N51	12.254	E16	59.906	51.2042	16.9984	N51	12.233	E16	59.832	51.2039	16.9972	N51	12.184	E16	59.874	51.2031	16.9979				16.9985	51.204	16.9986	51.2035	16.998	51.2037	16.9984	51.2042	16.9972	51.2039	16.9979
N51	12.24	E16	59.912	51.204	16.9985	N51	12.211	E16	59.914	51.2035	16.9986	N51	12.225	E16	59.883	51.2037	16.998	N51	12.254	E16	59.906	51.2042	16.9984	N51	12.233	E16	59.831	51.2039	16.9972	N51	12.185	E16	59.874	51.2031	16.9979				16.9986	51.204	16.9986	51.2035	16.998	51.2038	16.9984	51.2042	16.9972	51.2039	16.9979
N51	12.24	E16	59.913	51.204	16.9986	N51	12.211	E16	59.913	51.2035	16.9986	N51	12.226	E16	59.883	51.2038	16.998	N51	12.253	E16	59.906	51.2042	16.9984	N51	12.233	E16	59.83	51.2039	16.9972	N51	12.185	E16	59.873	51.2031	16.9979				16.9986	51.204	16.9986	51.2035	16.998	51.2038	16.9984	51.2042	16.9972	51.2039	16.9979
N51	12.24	E16	59.914	51.204	16.9986	N51	12.211	E16	59.913	51.2035	16.9986	N51	12.226	E16	59.882	51.2038	16.998	N51	12.253	E16	59.906	51.2042	16.9984	N51	12.233	E16	59.83	51.2039	16.9972	N51	12.186	E16	59.873	51.2031	16.9979				16.9986	51.204	16.9985	51.2035	16.998	51.2038	16.9984	51.2042	16.9972	51.2039	16.9979
N51	12.239	E16	59.915	51.204	16.9986	N51	12.211	E16	59.912	51.2035	16.9985	N51	12.226	E16	59.882	51.2038	16.998	N51	12.253	E16	59.906	51.2042	16.9984	N51	12.233	E16	59.829	51.2039	16.9972	N51	12.187	E16	59.872	51.2031	16.9979				16.9986	51.204	16.9985	51.2035	16.998	51.2038	16.9984	51.2042	16.9971	51.2039	16.9979
N51	12.239	E16	59.915	51.204	16.9986	N51	12.21	E16	59.912	51.2035	16.9985	N51	12.227	E16	59.882	51.2038	16.998	N51	12.252	E16	59.906	51.2042	16.9984	N51	12.233	E16	59.828	51.2039	16.9971	N51	12.188	E16	59.872	51.2031	16.9979				16.9986	51.204	16.9985	51.2035	16.998	51.2038	16.9984	51.2042	16.9971	51.2039	16.9978
N51	12.239	E16	59.916	51.204	16.9986	N51	12.21	E16	59.911	51.2035	16.9985	N51	12.227	E16	59.882	51.2038	16.998	N51	12.252	E16	59.907	51.2042	16.9984	N51	12.233	E16	59.828	51.2039	16.9971	N51	12.189	E16	59.871	51.2032	16.9978				16.9986	51.204	16.9985	51.2035	16.998	51.2038	16.9984	51.2042	16.9971	51.2039	16.9978
N51	12.239	E16	59.917	51.204	16.9986	N51	12.21	E16	59.91	51.2035	16.9985	N51	12.228	E16	59.882	51.2038	16.998	N51	12.251	E16	59.907	51.2042	16.9984	N51	12.234	E16	59.827	51.2039	16.9971	N51	12.19	E16	59.871	51.2032	16.9978				16.9986	51.204	16.9985	51.2035	16.998	51.2038	16.9984	51.2042	16.9971	51.2039	16.9978
N51	12.239	E16	59.918	51.204	16.9986	N51	12.21	E16	59.91	51.2035	16.9985	N51	12.228	E16	59.882	51.2038	16.998	N51	12.251	E16	59.907	51.2042	16.9984	N51	12.234	E16	59.826	51.2039	16.9971	N51	12.191	E16	59.87	51.2032	16.9978				16.9987	51.204	16.9985	51.2035	16.998	51.2038	16.9984	51.2042	16.9971	51.2039	16.9978
N51	12.239	E16	59.919	51.204	16.9987	N51	12.21	E16	59.909	51.2035	16.9985	N51	12.229	E16	59.882	51.2038	16.998	N51	12.25	E16	59.907	51.2042	16.9984	N51	12.234	E16	59.826	51.2039	16.9971	N51	12.191	E16	59.87	51.2032	16.9978				16.9987	51.204	16.9985	51.2035	16.998	51.2038	16.9984	51.2042	16.9971	51.2039	16.9978
N51	12.238	E16	59.92	51.204	16.9987	N51	12.21	E16	59.908	51.2035	16.9985	N51	12.229	E16	59.882	51.2038	16.998	N51	12.25	E16	59.907	51.2042	16.9984	N51	12.234	E16	59.825	51.2039	16.9971	N51	12.192	E16	59.869	51.2032	16.9978				16.9987	51.204	16.9984	51.2035	16.998	51.2038	16.9984	51.2041	16.9971	51.2039	16.9978
N51	12.238	E16	59.92	51.204	16.9987	N51	12.21	E16	59.907	51.2035	16.9984	N51	12.23	E16	59.882	51.2038	16.998	N51	12.249	E16	59.907	51.2041	16.9984	N51	12.234	E16	59.824	51.2039	16.9971	N51	12.193	E16	59.868	51.2032	16.9978				16.9987	51.204	16.9984	51.2035	16.998	51.2038	16.9984	51.2041	16.9971	51.2039	16.9978
N51	12.238	E16	59.921	51.204	16.9987	N51	12.21	E16	59.907	51.2035	16.9984	N51	12.23	E16	59.882	51.2038	16.998	N51	12.249	E16	59.907	51.2041	16.9984	N51	12.234	E16	59.824	51.2039	16.9971	N51	12.194	E16	59.867	51.2032	16.9978				16.9987	51.204	16.9984	51.2035	16.998	51.2039	16.9984	51.2041	16.9971	51.2039	16.9978
N51	12.238	E16	59.922	51.204	16.9987	N51	12.21	E16	59.906	51.2035	16.9984	N51	12.231	E16	59.882	51.2039	16.998	N51	12.249	E16	59.907	51.2041	16.9984	N51	12.234	E16	59.823	51.2039	16.9971	N51	12.195	E16	59.867	51.2032	16.9978				16.9987	51.204	16.9984	51.2035	16.998	51.2039	16.9984	51.2041	16.997	51.2039	16.9978
N51	12.238	E16	59.923	51.204	16.9987	N51	12.21	E16	59.905	51.2035	16.9984	N51	12.231	E16	59.882	51.2039	16.998	N51	12.248	E16	59.907	51.2041	16.9984	N51	12.234	E16	59.822	51.2039	16.997	N51	12.195	E16	59.866	51.2032	16.9978				16.9987	51.204	16.9984	51.2035	16.998	51.2039	16.9984	51.2041	16.997	51.2039	16.9977
N51	12.238	E16	59.924	51.204	16.9987	N51	12.21	E16	59.905	51.2035	16.9984	N51	12.232	E16	59.882	51.2039	16.998	N51	12.248	E16	59.907	51.2041	16.9984	N51	12.234	E16	59.822	51.2039	16.997	N51	12.196	E16	59.865	51.2033	16.9977				16.9987	51.204	16.9984	51.2035	16.998	51.2039	16.9984	51.2041	16.997	51.2039	16.9977
N51	12.238	E16	59.924	51.204	16.9987	N51	12.21	E16	59.904	51.2035	16.9984	N51	12.232	E16	59.883	51.2039	16.998	N51	12.247	E16	59.907	51.2041	16.9984	N51	12.235	E16	59.821	51.2039	16.997	N51	12.197	E16	59.864	51.2033	16.9977				16.9988	51.204	16.9984	51.2035	16.998	51.2039	16.9984	51.2041	16.997	51.2039	16.9977
N51	12.238	E16	59.925	51.204	16.9988	N51	12.21	E16	59.903	51.2035	16.9984	N51	12.232	E16	59.883	51.2039	16.998	N51	12.247	E16	59.907	51.2041	16.9984	N51	12.235	E16	59.82	51.2039	16.997	N51	12.197	E16	59.863	51.2033	16.9977				16.9988	51.2039	16.9984	51.2035	16.998	51.2039	16.9984	51.2041	16.997	51.2039	16.9977
N51	12.237	E16	59.926	51.2039	16.9988	N51	12.21	E16	59.902	51.2035	16.9984	N51	12.233	E16	59.883	51.2039	16.998	N51	12.247	E16	59.907	51.2041	16.9984	N51	12.235	E16	59.82	51.2039	16.997	N51	12.198	E16	59.862	51.2033	16.9977				16.9988	51.2039	16.9984	51.2035	16.998	51.2039	16.9984	51.2041	16.997	51.2039	16.9977
N51	12.237	E16	59.927	51.2039	16.9988	N51	12.211	E16	59.902	51.2035	16.9984	N51	12.233	E16	59.883	51.2039	16.998	N51	12.246	E16	59.907	51.2041	16.9984	N51	12.235	E16	59.819	51.2039	16.997	N51	12.199	E16	59.86	51.2033	16.9977				16.9988	51.2039	16.9983	51.2035	16.9981	51.2039	16.9984	51.2041	16.997	51.2039	16.9977
N51	12.237	E16	59.928	51.2039	16.9988	N51	12.211	E16	59.901	51.2035	16.9983	N51	12.233	E16	59.884	51.2039	16.9981	N51	12.246	E16	59.907	51.2041	16.9984	N51	12.235	E16	59.819	51.2039	16.997	N51	12.199	E16	59.859	51.2033	16.9977				16.9988	51.2039	16.9983	51.2035	16.9981	51.2039	16.9984	51.2041	16.997	51.2039	16.9976
N51	12.237	E16	59.928	51.2039	16.9988	N51	12.211	E16	59.9	51.2035	16.9983	N51	12.234	E16	59.884	51.2039	16.9981	N51	12.245	E16	59.907	51.2041	16.9984	N51	12.235	E16	59.818	51.2039	16.997	N51	12.2	E16	59.858	51.2033	16.9976				16.9988	51.2039	16.9983	51.2035	16.9981	51.2039	16.9984	51.2041	16.9969	51.2039	16.9976
N51	12.237	E16	59.929	51.2039	16.9988	N51	12.211	E16	59.9	51.2035	16.9983	N51	12.234	E16	59.884	51.2039	16.9981	N51	12.245	E16	59.907	51.2041	16.9984	N51	12.235	E16	59.817	51.2039	16.9969	N51	12.2	E16	59.857	51.2033	16.9976				16.9988	51.2039	16.9983	51.2035	16.9981	51.2039	16.9984	51.2041	16.9969	51.2039	16.9976
N51	12.236	E16	59.93	51.2039	16.9988	N51	12.211	E16	59.899	51.2035	16.9983	N51	12.234	E16	59.885	51.2039	16.9981	N51	12.244	E16	59.907	51.2041	16.9984	N51	12.236	E16	59.817	51.2039	16.9969	N51	12.201	E16	59.855	51.2034	16.9976				16.9989	51.2039	16.9983	51.2035	16.9981	51.2039	16.9984	51.2041	16.9969	51.2039	16.9976
N51	12.236	E16	59.931	51.2039	16.9989	N51	12.211	E16	59.898	51.2035	16.9983	N51	12.235	E16	59.885	51.2039	16.9981	N51	12.244	E16	59.907	51.2041	16.9984	N51	12.236	E16	59.816	51.2039	16.9969	N51	12.201	E16	59.854	51.2034	16.9976				16.9989	51.2039	16.9983	51.2035	16.9981	51.2039	16.9984	51.2041	16.9969	51.2039	16.9976
N51	12.236	E16	59.931	51.2039	16.9989	N51	12.212	E16	59.898	51.2035	16.9983	N51	12.235	E16	59.885	51.2039	16.9981	N51	12.244	E16	59.907	51.2041	16.9984	N51	12.236	E16	59.815	51.2039	16.9969	N51	12.201	E16	59.853	51.2034	16.9976				16.9989	51.2039	16.9983	51.2035	16.9981	51.2039	16.9984	51.2041	16.9969	51.2039	16.9975
N51	12.236	E16	59.932	51.2039	16.9989	N51	12.212	E16	59.897	51.2035	16.9983	N51	12.235	E16	59.886	51.2039	16.9981	N51	12.243	E16	59.907	51.2041	16.9984	N51	12.236	E16	59.815	51.2039	16.9969	N51	12.202	E16	59.852	51.2034	16.9975				16.9989	51.2039	16.9983	51.2035	16.9981	51.2039	16.9984	51.2041	16.9969	51.2039	16.9975
N51	12.235	E16	59.933	51.2039	16.9989	N51	12.212	E16	59.897	51.2035	16.9983	N51	12.235	E16	59.886	51.2039	16.9981	N51	12.243	E16	59.907	51.2041	16.9984	N51	12.236	E16	59.814	51.2039	16.9969	N51	12.203	E16	59.851	51.2034	16.9975				16.9989	51.2039	16.9983	51.2035	16.9981	51.2039	16.9984	51.204	16.9969	51.2039	16.9975
N51	12.235	E16	59.934	51.2039	16.9989	N51	12.213	E16	59.896	51.2035	16.9983	N51	12.236	E16	59.887	51.2039	16.9981	N51	12.242	E16	59.907	51.204	16.9984	N51	12.236	E16	59.814	51.2039	16.9969	N51	12.203	E16	59.85	51.2034	16.9975				16.9989	51.2039	16.9983	51.2035	16.9981	51.2039	16.9984	51.204	16.9969	51.2039	16.9975
N51	12.235	E16	59.934	51.2039	16.9989	N51	12.213	E16	59.896	51.2035	16.9983	N51	12.236	E16	59.887	51.2039	16.9981	N51	12.242	E16	59.907	51.204	16.9984	N51	12.236	E16	59.813	51.2039	16.9969	N51	12.204	E16	59.849	51.2034	16.9975				16.9989	51.2039	16.9982	51.2036	16.9981	51.2039	16.9984	51.204	16.9969	51.2039	16.9975
N51	12.234	E16	59.935	51.2039	16.9989	N51	12.214	E16	59.895	51.2036	16.9982	N51	12.236	E16	59.888	51.2039	16.9981	N51	12.242	E16	59.906	51.204	16.9984	N51	12.237	E16	59.813	51.2039	16.9969	N51	12.204	E16	59.848	51.2034	16.9975				16.9989	51.2039	16.9982	51.2036	16.9981	51.2039	16.9984	51.204	16.9969	51.2039	16.9975
N51	12.234	E16	59.935	51.2039	16.9989	N51	12.214	E16	59.895	51.2036	16.9982	N51	12.236	E16	59.889	51.2039	16.9981	N51	12.241	E16	59.906	51.204	16.9984	N51	12.237	E16	59.812	51.2039	16.9969	N51	12.205	E16	59.847	51.2034	16.9975				16.9989	51.2039	16.9982	51.2036	16.9981	51.2039	16.9984	51.204	16.9969	51.2039	16.9974
N51	12.233	E16	59.936	51.2039	16.9989	N51	12.214	E16	59.894	51.2036	16.9982	N51	12.236	E16	59.889	51.2039	16.9981	N51	12.241	E16	59.906	51.204	16.9984	N51	12.237	E16	59.812	51.2039	16.9969	N51	12.206	E16	59.846	51.2034	16.9974				16.9989	51.2039	16.9982	51.2036	16.9982	51.2039	16.9984	51.204	16.9968	51.2039	16.9974
N51	12.233	E16	59.936	51.2039	16.9989	N51	12.215	E16	59.894	51.2036	16.9982	N51	12.237	E16	59.89	51.2039	16.9982	N51	12.241	E16	59.906	51.204	16.9984	N51	12.237	E16	59.811	51.2039	16.9968	N51	12.207	E16	59.846	51.2034	16.9974				16.999	51.2039	16.9982	51.2036	16.9982	51.2039	16.9984	51.204	16.9968	51.2039	16.9974
N51	12.232	E16	59.937	51.2039	16.999	N51	12.215	E16	59.894	51.2036	16.9982	N51	12.237	E16	59.891	51.2039	16.9982	N51	12.24	E16	59.905	51.204	16.9984	N51	12.237	E16	59.811	51.2039	16.9968	N51	12.207	E16	59.845	51.2034	16.9974				16.999	51.2039	16.9982	51.2036	16.9982	51.2039	16.9984	51.204	16.9968	51.204	16.9974
N51	12.232	E16	59.937	51.2039	16.999	N51	12.216	E16	59.894	51.2036	16.9982	N51	12.237	E16	59.891	51.2039	16.9982	N51	12.24	E16	59.905	51.204	16.9984	N51	12.238	E16	59.81	51.204	16.9968	N51	12.208	E16	59.845	51.2035	16.9974				16.999	51.2039	16.9982	51.2036	16.9982	51.2039	16.9984	51.204	16.9968	51.204	16.9974
N51	12.232	E16	59.937	51.2039	16.999	N51	12.216	E16	59.894	51.2036	16.9982	N51	12.237	E16	59.892	51.2039	16.9982	N51	12.239	E16	59.905	51.204	16.9984	N51	12.238	E16	59.81	51.204	16.9968	N51	12.209	E16	59.845	51.2035	16.9974				16.999	51.2039	16.9982	51.2036	16.9982	51.2039	16.9984	51.204	16.9968	51.204	16.9974
N51	12.231	E16	59.938	51.2039	16.999	N51	12.217	E16	59.893	51.2036	16.9982	N51	12.237	E16	59.892	51.2039	16.9982	N51	12.239	E16	59.904	51.204	16.9984	N51	12.238	E16	59.809	51.204	16.9968	N51	12.21	E16	59.845	51.2035	16.9974				16.999	51.2039	16.9982	51.2036	16.9982	51.2039	16.9984	51.204	16.9968	51.204	16.9974
N51	12.231	E16	59.938	51.2039	16.999	N51	12.217	E16	59.893	51.2036	16.9982	N51	12.237	E16	59.893	51.2039	16.9982	N51	12.239	E16	59.904	51.204	16.9984	N51	12.239	E16	59.809	51.204	16.9968	N51	12.211	E16	59.846	51.2035	16.9974				16.999	51.2038	16.9982	51.2036	16.9982	51.2039	16.9984	51.204	16.9968	51.204	16.9974
N51	12.23	E16	59.938	51.2038	16.999	N51	12.218	E16	59.894	51.2036	16.9982	N51	12.237	E16	59.894	51.2039	16.9982	N51	12.238	E16	59.904	51.204	16.9984	N51	12.239	E16	59.808	51.204	16.9968	N51	12.212	E16	59.846	51.2035	16.9974				16.999	51.2038	16.9982	51.2036	16.9982	51.2039	16.9984	51.204	16.9968	51.204	16.9974
N51	12.23	E16	59.938	51.2038	16.999	N51	12.218	E16	59.894	51.2036	16.9982	N51	12.237	E16	59.894	51.2039	16.9982	N51	12.238	E16	59.903	51.204	16.9984	N51	12.239	E16	59.808	51.204	16.9968	N51	12.212	E16	59.846	51.2035	16.9974				16.999	51.2038	16.9982	51.2037	16.9982	51.2039	16.9984	51.2039	16.9968	51.204	16.9975
N51	12.229	E16	59.938	51.2038	16.999	N51	12.219	E16	59.894	51.2037	16.9982	N51	12.237	E16	59.895	51.2039	16.9982	N51	12.237	E16	59.903	51.2039	16.9984	N51	12.24	E16	59.807	51.204	16.9968	N51	12.213	E16	59.847	51.2035	16.9975				16.999	51.2038	16.9982	51.2037	16.9982	51.2039	16.9984	51.2039	16.9968	51.204	16.9975
N51	12.229	E16	59.939	51.2038	16.999	N51	12.219	E16	59.894	51.2037	16.9982	N51	12.237	E16	59.895	51.2039	16.9982	N51	12.237	E16	59.902	51.2039	16.9984	N51	12.24	E16	59.807	51.204	16.9968	N51	12.214	E16	59.847	51.2036	16.9975				16.999	51.2038	16.9982	51.2037	16.9983	51.2039	16.9984	51.2039	16.9968	51.204	16.9975
N51	12.228	E16	59.939	51.2038	16.999	N51	12.22	E16	59.894	51.2037	16.9982	N51	12.237	E16	59.896	51.2039	16.9983	N51	12.237	E16	59.902	51.2039	16.9984	N51	12.24	E16	59.807	51.204	16.9968	N51	12.215	E16	59.848	51.2036	16.9975				16.999	51.2038	16.9982	51.2037	16.9983	51.2039	16.9984	51.2039	16.9968	51.204	16.9975
N51	12.228	E16	59.939	51.2038	16.999	N51	12.22	E16	59.894	51.2037	16.9982	N51	12.236	E16	59.897	51.2039	16.9983	N51	12.236	E16	59.902	51.2039	16.9984	N51	12.241	E16	59.806	51.204	16.9968	N51	12.215	E16	59.849	51.2036	16.9975				16.999	51.2038	16.9982	51.2037	16.9983	51.2039	16.9983	51.2039	16.9968	51.204	16.9975
N51	12.227	E16	59.939	51.2038	16.999	N51	12.221	E16	59.894	51.2037	16.9982	N51	12.236	E16	59.897	51.2039	16.9983	N51	12.236	E16	59.901	51.2039	16.9983	N51	12.241	E16	59.806	51.204	16.9968	N51	12.216	E16	59.849	51.2036	16.9975				16.999	51.2038	16.9982	51.2037	16.9983	51.2039	16.9983	51.2039	16.9967	51.204	16.9975
N51	12.227	E16	59.939	51.2038	16.999	N51	12.221	E16	59.895	51.2037	16.9982	N51	12.236	E16	59.898	51.2039	16.9983	N51	12.236	E16	59.901	51.2039	16.9983	N51	12.241	E16	59.805	51.204	16.9967	N51	12.217	E16	59.85	51.2036	16.9975				16.999	51.2038	16.9982	51.2037	16.9983	51.2039	16.9983	51.2039	16.9967	51.204	16.9975
N51	12.226	E16	59.939	51.2038	16.999	N51	12.221	E16	59.895	51.2037	16.9982	N51	12.236	E16	59.898	51.2039	16.9983	N51	12.235	E16	59.9	51.2039	16.9983	N51	12.241	E16	59.805	51.204	16.9967	N51	12.217	E16	59.851	51.2036	16.9975				16.999	51.2038	16.9983	51.2037	16.9983	51.2039	16.9983	51.2039	16.9967	51.204	16.9975
N51	12.226	E16	59.939	51.2038	16.999	N51	12.222	E16	59.896	51.2037	16.9983	N51	12.236	E16	59.899	51.2039	16.9983	N51	12.235	E16	59.9	51.2039	16.9983	N51	12.242	E16	59.804	51.204	16.9967	N51	12.218	E16	59.852	51.2036	16.9975				16.999	51.2037	16.9983	51.2037	16.9983	51.2039	16.9983	51.2039	16.9967	51.204	16.9976
N51	12.225	E16	59.939	51.2037	16.999	N51	12.222	E16	59.896	51.2037	16.9983	N51	12.236	E16	59.899	51.2039	16.9983	N51	12.235	E16	59.9	51.2039	16.9983	N51	12.242	E16	59.804	51.204	16.9967	N51	12.218	E16	59.854	51.2036	16.9976				16.999	51.2037	16.9983	51.2037	16.9983	51.2039	16.9983	51.2039	16.9967	51.204	16.9976
N51	12.225	E16	59.939	51.2037	16.999	N51	12.222	E16	59.897	51.2037	16.9983	N51	12.235	E16	59.9	51.2039	16.9983	N51	12.234	E16	59.899	51.2039	16.9983	N51	12.242	E16	59.804	51.204	16.9967	N51	12.218	E16	59.855	51.2036	16.9976				16.999	51.2037	16.9983	51.2037	16.9983	51.2039	16.9983	51.2039	16.9967	51.2041	16.9976
N51	12.224	E16	59.939	51.2037	16.999	N51	12.223	E16	59.897	51.2037	16.9983	N51	12.235	E16	59.9	51.2039	16.9983	N51	12.234	E16	59.899	51.2039	16.9983	N51	12.243	E16	59.803	51.2041	16.9967	N51	12.218	E16	59.856	51.2036	16.9976				16.999	51.2037	16.9983	51.2037	16.9983	51.2039	16.9983	51.2039	16.9967	51.2041	16.9976
N51	12.223	E16	59.939	51.2037	16.999	N51	12.223	E16	59.898	51.2037	16.9983	N51	12.235	E16	59.901	51.2039	16.9983	N51	12.233	E16	59.899	51.2039	16.9983	N51	12.243	E16	59.803	51.2041	16.9967	N51	12.218	E16	59.858	51.2036	16.9976				16.999	51.2037	16.9983	51.2037	16.9983	51.2039	16.9983	51.2039	16.9967	51.2041	16.9977
N51	12.223	E16	59.939	51.2037	16.999	N51	12.223	E16	59.898	51.2037	16.9983	N51	12.234	E16	59.901	51.2039	16.9983	N51	12.233	E16	59.898	51.2039	16.9983	N51	12.243	E16	59.803	51.2041	16.9967	N51	12.218	E16	59.859	51.2036	16.9977				16.999	51.2037	16.9983	51.2037	16.9984	51.2039	16.9983	51.2039	16.9967	51.2041	16.9977
N51	12.222	E16	59.938	51.2037	16.999	N51	12.223	E16	59.899	51.2037	16.9983	N51	12.234	E16	59.902	51.2039	16.9984	N51	12.233	E16	59.898	51.2039	16.9983	N51	12.244	E16	59.802	51.2041	16.9967	N51	12.218	E16	59.86	51.2036	16.9977				16.999	51.2037	16.9983	51.2037	16.9984	51.2039	16.9983	51.2039	16.9967	51.2041	16.9977
N51	12.222	E16	59.938	51.2037	16.999	N51	12.223	E16	59.9	51.2037	16.9983	N51	12.234	E16	59.902	51.2039	16.9984	N51	12.232	E16	59.898	51.2039	16.9983	N51	12.244	E16	59.802	51.2041	16.9967	N51	12.218	E16	59.862	51.2036	16.9977				16.999	51.2037	16.9983	51.2037	16.9984	51.2039	16.9983	51.2039	16.9967	51.2041	16.9977
N51	12.221	E16	59.938	51.2037	16.999	N51	12.223	E16	59.9	51.2037	16.9983	N51	12.234	E16	59.903	51.2039	16.9984	N51	12.232	E16	59.897	51.2039	16.9983	N51	12.244	E16	59.802	51.2041	16.9967	N51	12.218	E16	59.863	51.2036	16.9977				16.999	51.2037	16.9983	51.2037	16.9984	51.2039	16.9983	51.2039	16.9967	51.2041	16.9977
N51	12.221	E16	59.938	51.2037	16.999	N51	12.223	E16	59.901	51.2037	16.9983	N51	12.233	E16	59.903	51.2039	16.9984	N51	12.232	E16	59.897	51.2039	16.9983	N51	12.245	E16	59.802	51.2041	16.9967	N51	12.217	E16	59.864	51.2036	16.9977				16.999	51.2037	16.9984	51.2037	16.9984	51.2039	16.9983	51.2039	16.9967	51.2041	16.9977
N51	12.22	E16	59.938	51.2037	16.999	N51	12.223	E16	59.902	51.2037	16.9984	N51	12.233	E16	59.903	51.2039	16.9984	N51	12.231	E16	59.896	51.2039	16.9983	N51	12.245	E16	59.802	51.2041	16.9967	N51	12.217	E16	59.865	51.2036	16.9977				16.999	51.2037	16.9984	51.2037	16.9984	51.2039	16.9983	51.2039	16.9967	51.2041	16.9978
N51	12.22	E16	59.938	51.2037	16.999	N51	12.223	E16	59.903	51.2037	16.9984	N51	12.233	E16	59.904	51.2039	16.9984	N51	12.231	E16	59.896	51.2039	16.9983	N51	12.246	E16	59.801	51.2041	16.9967	N51	12.216	E16	59.866	51.2036	16.9978				16.999	51.2037	16.9984	51.2037	16.9984	51.2039	16.9982	51.2039	16.9967	51.2041	16.9978
N51	12.219	E16	59.937	51.2037	16.999	N51	12.223	E16	59.903	51.2037	16.9984	N51	12.232	E16	59.904	51.2039	16.9984	N51	12.231	E16	59.895	51.2039	16.9982	N51	12.246	E16	59.801	51.2041	16.9967	N51	12.216	E16	59.867	51.2036	16.9978				16.999	51.2037	16.9984	51.2037	16.9984	51.2039	16.9982	51.2039	16.9967	51.2041	16.9978
N51	12.219	E16	59.937	51.2037	16.999	N51	12.223	E16	59.904	51.2037	16.9984	N51	12.232	E16	59.904	51.2039	16.9984	N51	12.231	E16	59.895	51.2039	16.9982	N51	12.246	E16	59.801	51.2041	16.9967	N51	12.215	E16	59.868	51.2036	16.9978				16.999	51.2036	16.9984	51.2037	16.9984	51.2039	16.9982	51.2038	16.9967	51.2041	16.9978
N51	12.218	E16	59.937	51.2036	16.999	N51	12.223	E16	59.905	51.2037	16.9984	N51	12.231	E16	59.905	51.2039	16.9984	N51	12.23	E16	59.894	51.2038	16.9982	N51	12.247	E16	59.801	51.2041	16.9967	N51	12.214	E16	59.869	51.2036	16.9978				16.9989	51.2036	16.9984	51.2037	16.9984	51.2039	16.9982	51.2038	16.9967	51.2041	16.9978
N51	12.218	E16	59.936	51.2036	16.9989	N51	12.222	E16	59.905	51.2037	16.9984	N51	12.231	E16	59.905	51.2039	16.9984	N51	12.23	E16	59.894	51.2038	16.9982	N51	12.247	E16	59.801	51.2041	16.9967	N51	12.214	E16	59.869	51.2036	16.9978				16.9989	51.2036	16.9984	51.2037	16.9984	51.2039	16.9982	51.2038	16.9967	51.2041	16.9978
N51	12.217	E16	59.936	51.2036	16.9989	N51	12.222	E16	59.906	51.2037	16.9984	N51	12.231	E16	59.905	51.2039	16.9984	N51	12.23	E16	59.893	51.2038	16.9982	N51	12.248	E16	59.801	51.2041	16.9967	N51	12.213	E16	59.87	51.2035	16.9978				16.9989	51.2036	16.9984	51.2037	16.9984	51.2038	16.9982	51.2038	16.9967	51.2041	16.9978
N51	12.217	E16	59.936	51.2036	16.9989	N51	12.222	E16	59.907	51.2037	16.9984	N51	12.23	E16	59.905	51.2038	16.9984	N51	12.229	E16	59.893	51.2038	16.9982	N51	12.248	E16	59.801	51.2041	16.9967	N51	12.212	E16	59.87	51.2035	16.9978				16.9989	51.2036	16.9984	51.2037	16.9984	51.2038	16.9982	51.2038	16.9967	51.2041	16.9978
N51	12.216	E16	59.936	51.2036	16.9989	N51	12.222	E16	59.907	51.2037	16.9984	N51	12.23	E16	59.905	51.2038	16.9984	N51	12.229	E16	59.892	51.2038	16.9982	N51	12.249	E16	59.8	51.2041	16.9967	N51	12.211	E16	59.871	51.2035	16.9978				16.9989	51.2036	16.9985	51.2037	16.9984	51.2038	16.9982	51.2038	16.9967	51.2041	16.9978
N51	12.216	E16	59.935	51.2036	16.9989	N51	12.221	E16	59.908	51.2037	16.9985	N51	12.229	E16	59.905	51.2038	16.9984	N51	12.229	E16	59.892	51.2038	16.9982	N51	12.249	E16	59.8	51.2041	16.9967	N51	12.21	E16	59.871	51.2035	16.9978				16.9989	51.2036	16.9985	51.2037	16.9984	51.2038	16.9982	51.2038	16.9967	51.2041	16.9978
N51	12.215	E16	59.935	51.2036	16.9989	N51	12.221	E16	59.908	51.2037	16.9985	N51	12.229	E16	59.905	51.2038	16.9984	N51	12.229	E16	59.891	51.2038	16.9982	N51	12.249	E16	59.8	51.2041	16.9967	N51	12.21	E16	59.871	51.2035	16.9978				16.9989	51.2036	16.9985	51.2037	16.9984	51.2038	16.9982	51.2038	16.9967	51.2042	16.9978
N51	12.215	E16	59.935	51.2036	16.9989	N51	12.221	E16	59.909	51.2037	16.9985	N51	12.229	E16	59.905	51.2038	16.9984	N51	12.228	E16	59.89	51.2038	16.9982	N51	12.25	E16	59.8	51.2042	16.9967	N51	12.209	E16	59.871	51.2035	16.9978				16.9989	51.2036	16.9985	51.2037	16.9984	51.2038	16.9982	51.2038	16.9967	51.2042	16.9978
N51	12.214	E16	59.934	51.2036	16.9989	N51	12.22	E16	59.909	51.2037	16.9985	N51	12.228	E16	59.905	51.2038	16.9984	N51	12.228	E16	59.89	51.2038	16.9982	N51	12.25	E16	59.8	51.2042	16.9967	N51	12.208	E16	59.871	51.2035	16.9978				16.9989	51.2036	16.9985	51.2037	16.9984	51.2038	16.9981	51.2038	16.9967	51.2042	16.9979
N51	12.214	E16	59.934	51.2036	16.9989	N51	12.22	E16	59.909	51.2037	16.9985	N51	12.228	E16	59.905	51.2038	16.9984	N51	12.228	E16	59.889	51.2038	16.9981	N51	12.251	E16	59.8	51.2042	16.9967	N51	12.207	E16	59.872	51.2034	16.9979				16.9989	51.2035	16.9985	51.2037	16.9984	51.2038	16.9981	51.2038	16.9967	51.2042	16.9979
N51	12.213	E16	59.934	51.2035	16.9989	N51	12.219	E16	59.909	51.2037	16.9985	N51	12.227	E16	59.904	51.2038	16.9984	N51	12.228	E16	59.889	51.2038	16.9981	N51	12.251	E16	59.8	51.2042	16.9967	N51	12.206	E16	59.872	51.2034	16.9979				16.9989	51.2035	16.9985	51.2037	16.9984	51.2038	16.9981	51.2038	16.9967	51.2042	16.9979
N51	12.213	E16	59.933	51.2035	16.9989	N51	12.219	E16	59.91	51.2037	16.9985	N51	12.227	E16	59.904	51.2038	16.9984	N51	12.227	E16	59.888	51.2038	16.9981	N51	12.252	E16	59.8	51.2042	16.9967	N51	12.205	E16	59.873	51.2034	16.9979				16.9989	51.2035	16.9985	51.2036	16.9984	51.2038	16.9981	51.2038	16.9967	51.2042	16.9979
N51	12.212	E16	59.933	51.2035	16.9989	N51	12.218	E16	59.91	51.2036	16.9985	N51	12.226	E16	59.904	51.2038	16.9984	N51	12.227	E16	59.888	51.2038	16.9981	N51	12.252	E16	59.8	51.2042	16.9967	N51	12.204	E16	59.873	51.2034	16.9979				16.9989	51.2035	16.9985	51.2036	16.9984	51.2038	16.9981	51.2038	16.9967	51.2042	16.9979
N51	12.212	E16	59.932	51.2035	16.9989	N51	12.218	E16	59.91	51.2036	16.9985	N51	12.226	E16	59.904	51.2038	16.9984	N51	12.227	E16	59.887	51.2038	16.9981	N51	12.253	E16	59.8	51.2042	16.9967	N51	12.204	E16	59.873	51.2034	16.9979				16.9989	51.2035	16.9985	51.2036	16.9984	51.2038	16.9981	51.2038	16.9967	51.2042	16.9979
N51	12.211	E16	59.932	51.2035	16.9989	N51	12.217	E16	59.91	51.2036	16.9985	N51	12.226	E16	59.903	51.2038	16.9984	N51	12.227	E16	59.886	51.2038	16.9981	N51	12.253	E16	59.8	51.2042	16.9967	N51	12.203	E16	59.873	51.2034	16.9979				16.9989	51.2035	16.9985	51.2036	16.9984	51.2037	16.9981	51.2038	16.9967	51.2042	16.9979
N51	12.211	E16	59.931	51.2035	16.9989	N51	12.217	E16	59.91	51.2036	16.9985	N51	12.225	E16	59.903	51.2037	16.9984	N51	12.227	E16	59.886	51.2038	16.9981	N51	12.253	E16	59.8	51.2042	16.9967	N51	12.202	E16	59.873	51.2034	16.9979				16.9989	51.2035	16.9985	51.2036	16.9984	51.2037	16.9981	51.2038	16.9967	51.2042	16.9979
N51	12.211	E16	59.931	51.2035	16.9989	N51	12.216	E16	59.91	51.2036	16.9985	N51	12.225	E16	59.903	51.2037	16.9984	N51	12.227	E16	59.885	51.2038	16.9981	N51	12.254	E16	59.8	51.2042	16.9967	N51	12.201	E16	59.873	51.2034	16.9979				16.9989	51.2035	16.9985	51.2036	16.9984	51.2037	16.9981	51.2038	16.9967	51.2042	16.9979
N51	12.21	E16	59.931	51.2035	16.9989	N51	12.216	E16	59.909	51.2036	16.9985	N51	12.224	E16	59.903	51.2037	16.9984	N51	12.227	E16	59.885	51.2038	16.9981	N51	12.254	E16	59.801	51.2042	16.9967	N51	12.2	E16	59.873	51.2033	16.9979				16.9988	51.2035	16.9985	51.2036	16.9984	51.2037	16.9981	51.2038	16.9967	51.2043	16.9979
N51	12.21	E16	59.93	51.2035	16.9988	N51	12.215	E16	59.909	51.2036	16.9985	N51	12.224	E16	59.902	51.2037	16.9984	N51	12.227	E16	59.884	51.2038	16.9981	N51	12.255	E16	59.801	51.2043	16.9967	N51	12.199	E16	59.873	51.2033	16.9979				16.9988	51.2035	16.9985	51.2036	16.9984	51.2037	16.998	51.2038	16.9967	51.2043	16.9979
N51	12.209	E16	59.93	51.2035	16.9988	N51	12.215	E16	59.909	51.2036	16.9985	N51	12.224	E16	59.902	51.2037	16.9984	N51	12.227	E16	59.883	51.2038	16.998	N51	12.255	E16	59.801	51.2043	16.9967	N51	12.199	E16	59.872	51.2033	16.9979				16.9988	51.2035	16.9985	51.2036	16.9983	51.2037	16.998	51.2038	16.9967	51.2043	16.9979
N51	12.209	E16	59.929	51.2035	16.9988	N51	12.215	E16	59.909	51.2036	16.9985	N51	12.223	E16	59.901	51.2037	16.9983	N51	12.226	E16	59.883	51.2038	16.998	N51	12.255	E16	59.802	51.2043	16.9967	N51	12.198	E16	59.872	51.2033	16.9979				16.9988	51.2035	16.9985	51.2036	16.9983	51.2037	16.998	51.2038	16.9967	51.2043	16.9979
N51	12.209	E16	59.928	51.2035	16.9988	N51	12.214	E16	59.908	51.2036	16.9985	N51	12.223	E16	59.901	51.2037	16.9983	N51	12.226	E16	59.882	51.2038	16.998	N51	12.256	E16	59.802	51.2043	16.9967	N51	12.197	E16	59.872	51.2033	16.9979				16.9988	51.2035	16.9985	51.2036	16.9983	51.2037	16.998	51.2038	16.9967	51.2043	16.9979
N51	12.208	E16	59.928	51.2035	16.9988	N51	12.214	E16	59.908	51.2036	16.9985	N51	12.223	E16	59.901	51.2037	16.9983	N51	12.226	E16	59.881	51.2038	16.998	N51	12.256	E16	59.802	51.2043	16.9967	N51	12.196	E16	59.872	51.2033	16.9979				16.9988	51.2035	16.9985	51.2035	16.9983	51.2037	16.998	51.2038	16.9967	51.2043	16.9978
N51	12.208	E16	59.928	51.2035	16.9988	N51	12.213	E16	59.908	51.2035	16.9985	N51	12.223	E16	59.9	51.2037	16.9983	N51	12.226	E16	59.881	51.2038	16.998	N51	12.256	E16	59.803	51.2043	16.9967	N51	12.195	E16	59.871	51.2032	16.9978				16.9988	51.2035	16.9984	51.2035	16.9983	51.2037	16.998	51.2038	16.9967	51.2043	16.9978
N51	12.208	E16	59.927	51.2035	16.9988	N51	12.213	E16	59.907	51.2035	16.9984	N51	12.222	E16	59.9	51.2037	16.9983	N51	12.226	E16	59.88	51.2038	16.998	N51	12.257	E16	59.803	51.2043	16.9967	N51	12.194	E16	59.87	51.2032	16.9978				16.9988	51.2034	16.9984	51.2035	16.9983	51.2037	16.998	51.2038	16.9967	51.2043	16.9978
N51	12.207	E16	59.926	51.2034	16.9988	N51	12.213	E16	59.906	51.2035	16.9984	N51	12.222	E16	59.9	51.2037	16.9983	N51	12.226	E16	59.879	51.2038	16.998	N51	12.257	E16	59.804	51.2043	16.9967	N51	12.193	E16	59.87	51.2032	16.9978				16.9988	51.2034	16.9984	51.2035	16.9983	51.2037	16.998	51.2038	16.9967	51.2043	16.9978
N51	12.207	E16	59.926	51.2034	16.9988	N51	12.213	E16	59.906	51.2035	16.9984	N51	12.222	E16	59.899	51.2037	16.9983	N51	12.226	E16	59.879	51.2038	16.998	N51	12.257	E16	59.804	51.2043	16.9967	N51	12.192	E16	59.869	51.2032	16.9978				16.9988	51.2034	16.9984	51.2035	16.9983	51.2037	16.998	51.2038	16.9967	51.2043	16.9978
N51	12.207	E16	59.925	51.2034	16.9988	N51	12.212	E16	59.905	51.2035	16.9984	N51	12.222	E16	59.899	51.2037	16.9983	N51	12.226	E16	59.878	51.2038	16.998	N51	12.258	E16	59.805	51.2043	16.9967	N51	12.192	E16	59.868	51.2032	16.9978				16.9987	51.2034	16.9984	51.2035	16.9983	51.2037	16.9979	51.2038	16.9967	51.2043	16.9978
N51	12.207	E16	59.924	51.2034	16.9987	N51	12.212	E16	59.905	51.2035	16.9984	N51	12.221	E16	59.898	51.2037	16.9983	N51	12.226	E16	59.877	51.2038	16.9979	N51	12.258	E16	59.805	51.2043	16.9967	N51	12.191	E16	59.868	51.2032	16.9978				16.9987	51.2034	16.9984	51.2035	16.9983	51.2037	16.9979	51.2038	16.9968	51.2043	16.9978
N51	12.206	E16	59.924	51.2034	16.9987	N51	12.212	E16	59.904	51.2035	16.9984	N51	12.221	E16	59.898	51.2037	16.9983	N51	12.226	E16	59.877	51.2038	16.9979	N51	12.258	E16	59.806	51.2043	16.9968	N51	12.19	E16	59.867	51.2032	16.9978				16.9987	51.2034	16.9984	51.2035	16.9983	51.2037	16.9979	51.2038	16.9968	51.2043	16.9978
N51	12.206	E16	59.923	51.2034	16.9987	N51	12.212	E16	59.903	51.2035	16.9984	N51	12.221	E16	59.897	51.2037	16.9983	N51	12.226	E16	59.876	51.2038	16.9979	N51	12.258	E16	59.806	51.2043	16.9968	N51	12.19	E16	59.866	51.2032	16.9978				16.9987	51.2034	16.9984	51.2035	16.9983	51.2037	16.9979	51.2038	16.9968	51.2043	16.9977
N51	12.206	E16	59.922	51.2034	16.9987	N51	12.212	E16	59.903	51.2035	16.9984	N51	12.221	E16	59.896	51.2037	16.9983	N51	12.226	E16	59.875	51.2038	16.9979	N51	12.259	E16	59.807	51.2043	16.9968	N51	12.189	E16	59.865	51.2032	16.9977				16.9987	51.2034	16.9984	51.2035	16.9983	51.2037	16.9979	51.2038	16.9968	51.2043	16.9977
N51	12.206	E16	59.922	51.2034	16.9987	N51	12.212	E16	59.902	51.2035	16.9984	N51	12.221	E16	59.896	51.2037	16.9983	N51	12.226	E16	59.875	51.2038	16.9979	N51	12.259	E16	59.808	51.2043	16.9968	N51	12.188	E16	59.863	51.2031	16.9977				16.9987	51.2034	16.9983	51.2035	16.9982	51.2037	16.9979	51.2038	16.9968	51.2043	16.9977
N51	12.205	E16	59.921	51.2034	16.9987	N51	12.212	E16	59.901	51.2035	16.9983	N51	12.221	E16	59.895	51.2037	16.9982	N51	12.226	E16	59.874	51.2038	16.9979	N51	12.259	E16	59.808	51.2043	16.9968	N51	12.188	E16	59.862	51.2031	16.9977				16.9987	51.2034	16.9983	51.2035	16.9982	51.2037	16.9979	51.2038	16.9968	51.2043	16.9977
N51	12.205	E16	59.92	51.2034	16.9987	N51	12.211	E16	59.9	51.2035	16.9983	N51	12.22	E16	59.895	51.2037	16.9982	N51	12.226	E16	59.873	51.2038	16.9979	N51	12.259	E16	59.809	51.2043	16.9968	N51	12.187	E16	59.861	51.2031	16.9977				16.9987	51.2034	16.9983	51.2035	16.9982	51.2037	16.9979	51.2038	16.9968	51.2043	16.9977
N51	12.205	E16	59.92	51.2034	16.9987	N51	12.211	E16	59.9	51.2035	16.9983	N51	12.22	E16	59.894	51.2037	16.9982	N51	12.226	E16	59.873	51.2038	16.9979	N51	12.26	E16	59.809	51.2043	16.9968	N51	12.187	E16	59.86	51.2031	16.9977				16.9987	51.2034	16.9983	51.2035	16.9982	51.2037	16.9979	51.2038	16.9968	51.2043	16.9977
N51	12.205	E16	59.919	51.2034	16.9987	N51	12.211	E16	59.899	51.2035	16.9983	N51	12.22	E16	59.893	51.2037	16.9982	N51	12.226	E16	59.872	51.2038	16.9979	N51	12.26	E16	59.81	51.2043	16.9968	N51	12.186	E16	59.859	51.2031	16.9977				16.9986	51.2034	16.9983	51.2035	16.9982	51.2037	16.9979	51.2038	16.9968	51.2043	16.9976
N51	12.205	E16	59.918	51.2034	16.9986	N51	12.211	E16	59.898	51.2035	16.9983	N51	12.22	E16	59.893	51.2037	16.9982	N51	12.226	E16	59.872	51.2038	16.9979	N51	12.26	E16	59.811	51.2043	16.9968	N51	12.186	E16	59.858	51.2031	16.9976				16.9986	51.2034	16.9983	51.2035	16.9982	51.2037	16.9978	51.2038	16.9968	51.2043	16.9976
N51	12.205	E16	59.917	51.2034	16.9986	N51	12.211	E16	59.898	51.2035	16.9983	N51	12.22	E16	59.892	51.2037	16.9982	N51	12.226	E16	59.871	51.2038	16.9978	N51	12.26	E16	59.811	51.2043	16.9968	N51	12.186	E16	59.857	51.2031	16.9976				16.9986	51.2034	16.9983	51.2035	16.9982	51.2037	16.9978	51.2038	16.9969	51.2043	16.9976
N51	12.205	E16	59.917	51.2034	16.9986	N51	12.212	E16	59.897	51.2035	16.9983	N51	12.22	E16	59.892	51.2037	16.9982	N51	12.226	E16	59.87	51.2038	16.9978	N51	12.26	E16	59.812	51.2043	16.9969	N51	12.185	E16	59.856	51.2031	16.9976				16.9986	51.2034	16.9983	51.2035	16.9982	51.2037	16.9978	51.2037	16.9969	51.2043
N51	12.205	E16	59.916	51.2034	16.9986	N51	12.212	E16	59.896	51.2035	16.9983	N51	12.22	E16	59.891	51.2037	16.9982	N51	12.225	E16	59.87	51.2037	16.9978	N51	12.261	E16	59.813	51.2043	16.9969										16.9986	51.2034	16.9982	51.2035	16.9982	51.2037	16.9978	51.2037	16.9969	51.2043
N51	12.204	E16	59.915	51.2034	16.9986	N51	12.212	E16	59.895	51.2035	16.9982	N51	12.22	E16	59.89	51.2037	16.9982	N51	12.225	E16	59.869	51.2037	16.9978	N51	12.261	E16	59.813	51.2043	16.9969										16.9986	51.2034	16.9982	51.2035	16.9982	51.2037	16.9978	51.2037	16.9969	51.2043
N51	12.204	E16	59.914	51.2034	16.9986	N51	12.212	E16	59.895	51.2035	16.9982	N51	12.22	E16	59.89	51.2037	16.9982	N51	12.225	E16	59.868	51.2037	16.9978	N51	12.261	E16	59.814	51.2043	16.9969										16.9986	51.2034	16.9982	51.2035	16.9981	51.2037	16.9978	51.2037	16.9969	51.2043
N51	12.204	E16	59.913	51.2034	16.9986	N51	12.212	E16	59.894	51.2035	16.9982	N51	12.22	E16	59.889	51.2037	16.9981	N51	12.225	E16	59.868	51.2037	16.9978	N51	12.261	E16	59.815	51.2043	16.9969										16.9986	51.2034	16.9982	51.2035	16.9981	51.2037	16.9978	51.2037	16.9969	51.2043
N51	12.205	E16	59.913	51.2034	16.9986	N51	12.212	E16	59.893	51.2035	16.9982	N51	12.22	E16	59.888	51.2037	16.9981	N51	12.225	E16	59.867	51.2037	16.9978	N51	12.261	E16	59.815	51.2043	16.9969										16.9985	51.2034	16.9982	51.2035	16.9981	51.2037	16.9978	51.2037	16.9969	51.2043
N51	12.205	E16	59.912	51.2034	16.9985	N51	12.212	E16	59.893	51.2035	16.9982	N51	12.22	E16	59.888	51.2037	16.9981	N51	12.225	E16	59.867	51.2037	16.9978	N51	12.261	E16	59.816	51.2043	16.9969										16.9985	51.2034	16.9982	51.2035	16.9981	51.2037	16.9978	51.2037	16.9969	51.2043
N51	12.205	E16	59.911	51.2034	16.9985	N51	12.212	E16	59.892	51.2035	16.9982	N51	12.221	E16	59.887	51.2037	16.9981	N51	12.225	E16	59.866	51.2037	16.9978	N51	12.261	E16	59.817	51.2043	16.9969										16.9985	51.2034	16.9982	51.2035	16.9981	51.2037	16.9977	51.2037	16.9969	51.2043
N51	12.205	E16	59.91	51.2034	16.9985	N51	12.213	E16	59.891	51.2035	16.9982	N51	12.221	E16	59.887	51.2037	16.9981	N51	12.225	E16	59.865	51.2037	16.9977	N51	12.261	E16	59.817	51.2043	16.9969										16.9985	51.2034	16.9982	51.2035	16.9981	51.2037	16.9977	51.2037	16.997	51.2043
N51	12.205	E16	59.91	51.2034	16.9985	N51	12.213	E16	59.891	51.2035	16.9982	N51	12.221	E16	59.886	51.2037	16.9981	N51	12.225	E16	59.865	51.2037	16.9977	N51	12.261	E16	59.818	51.2043	16.997										16.9985	51.2034	16.9982	51.2035	16.9981	51.2037	16.9977	51.2037	16.997	51.2043
N51	12.205	E16	59.909	51.2034	16.9985	N51	12.213	E16	59.89	51.2035	16.9982	N51	12.221	E16	59.885	51.2037	16.9981	N51	12.225	E16	59.864	51.2037	16.9977	N51	12.261	E16	59.818	51.2043	16.997										16.9985	51.2034	16.9982	51.2036	16.9981	51.2037	16.9977	51.2037	16.997	51.2043
N51	12.205	E16	59.908	51.2034	16.9985	N51	12.214	E16	59.89	51.2036	16.9982	N51	12.222	E16	59.885	51.2037	16.9981	N51	12.225	E16	59.863	51.2037	16.9977	N51	12.261	E16	59.819	51.2043	16.997										16.9984	51.2034	16.9981	51.2036	16.9981	51.2037	16.9977	51.2037	16.997	51.2043
N51	12.205	E16	59.907	51.2034	16.9984	N51	12.214	E16	59.889	51.2036	16.9981	N51	12.222	E16	59.884	51.2037	16.9981	N51	12.225	E16	59.863	51.2037	16.9977	N51	12.261	E16	59.82	51.2043	16.997										16.9984	51.2034	16.9981	51.2036	16.9981	51.2037	16.9977	51.2038	16.997	51.2043
N51	12.205	E16	59.907	51.2034	16.9984	N51	12.215	E16	59.889	51.2036	16.9981	N51	12.222	E16	59.884	51.2037	16.9981	N51	12.226	E16	59.862	51.2038	16.9977	N51	12.261	E16	59.821	51.2043	16.997										16.9984	51.2034	16.9981	51.2036	16.998	51.2037	16.9977	51.2038	16.997	51.2043
N51	12.205	E16	59.906	51.2034	16.9984	N51	12.215	E16	59.888	51.2036	16.9981	N51	12.222	E16	59.883	51.2037	16.998	N51	12.226	E16	59.861	51.2038	16.9977	N51	12.261	E16	59.821	51.2043	16.997										16.9984	51.2034	16.9981	51.2036	16.998	51.2037	16.9977	51.2038	16.997	51.2043
N51	12.206	E16	59.905	51.2034	16.9984	N51	12.215	E16	59.888	51.2036	16.9981	N51	12.222	E16	59.883	51.2037	16.998	N51	12.226	E16	59.861	51.2038	16.9977	N51	12.261	E16	59.822	51.2043	16.997										16.9984	51.2034	16.9981	51.2036	16.998	51.2037	16.9977	51.2038	16.9971	51.2043
N51	12.206	E16	59.905	51.2034	16.9984	N51	12.216	E16	59.888	51.2036	16.9981	N51	12.223	E16	59.882	51.2037	16.998	N51	12.226	E16	59.86	51.2038	16.9977	N51	12.261	E16	59.823	51.2043	16.9971										16.9984	51.2034	16.9981	51.2036	16.998	51.2037	16.9977	51.2038	16.9971	51.2043
N51	12.206	E16	59.904	51.2034	16.9984	N51	12.216	E16	59.887	51.2036	16.9981	N51	12.223	E16	59.882	51.2037	16.998	N51	12.226	E16	59.859	51.2038	16.9977	N51	12.261	E16	59.823	51.2043	16.9971										16.9984	51.2034	16.9981	51.2036	16.998	51.2037	16.9977	51.2038	16.9971	51.2043
N51	12.207	E16	59.904	51.2034	16.9984	N51	12.217	E16	59.887	51.2036	16.9981	N51	12.223	E16	59.881	51.2037	16.998	N51	12.226	E16	59.859	51.2038	16.9977	N51	12.261	E16	59.824	51.2043	16.9971										16.9984	51.2034	16.9981	51.2036	16.998	51.2037	16.9976	51.2038	16.9971	51.2043
N51	12.207	E16	59.903	51.2034	16.9984	N51	12.217	E16	59.887	51.2036	16.9981	N51	12.224	E16	59.88	51.2037	16.998	N51	12.226	E16	59.858	51.2038	16.9976	N51	12.261	E16	59.825	51.2043	16.9971										16.9984	51.2034	16.9981	51.2036	16.998	51.2037	16.9976	51.2038	16.9971	51.2043
N51	12.207	E16	59.902	51.2034	16.9984	N51	12.218	E16	59.887	51.2036	16.9981	N51	12.224	E16	59.88	51.2037	16.998	N51	12.226	E16	59.857	51.2038	16.9976	N51	12.261	E16	59.825	51.2043	16.9971										16.9984	51.2035	16.9981	51.2036	16.998	51.2037	16.9976	51.2038	16.9971	51.2043
N51	12.208	E16	59.902	51.2035	16.9984	N51	12.218	E16	59.886	51.2036	16.9981	N51	12.224	E16	59.879	51.2037	16.998	N51	12.226	E16	59.857	51.2038	16.9976	N51	12.261	E16	59.826	51.2043	16.9971										16.9983	51.2035	16.9981	51.2037	16.998	51.2037	16.9976	51.2038	16.9971	51.2043
N51	12.208	E16	59.901	51.2035	16.9983	N51	12.219	E16	59.886	51.2037	16.9981	N51	12.224	E16	59.879	51.2037	16.998	N51	12.226	E16	59.856	51.2038	16.9976	N51	12.26	E16	59.827	51.2043	16.9971										16.9983	51.2035	16.9981	51.2037	16.998	51.2037	16.9976	51.2038	16.9971	51.2043
N51	12.208	E16	59.901	51.2035	16.9983	N51	12.219	E16	59.886	51.2037	16.9981	N51	12.225	E16	59.878	51.2037	16.998	N51	12.226	E16	59.855	51.2038	16.9976	N51	12.26	E16	59.827	51.2043	16.9971										16.9983	51.2035	16.9981	51.2037	16.998	51.2037	16.9976	51.2038	16.9971	51.2043
N51	12.209	E16	59.9	51.2035	16.9983	N51	12.22	E16	59.886	51.2037	16.9981	N51	12.225	E16	59.878	51.2037	16.998	N51	12.227	E16	59.855	51.2038	16.9976	N51	12.26	E16	59.828	51.2043	16.9971										16.9983	51.2035	16.9981	51.2037	16.9979	51.2037	16.9976	51.2038	16.9972	51.2043
N51	12.209	E16	59.9	51.2035	16.9983	N51	12.22	E16	59.886	51.2037	16.9981	N51	12.225	E16	59.877	51.2037	16.9979	N51	12.227	E16	59.854	51.2038	16.9976	N51	12.26	E16	59.829	51.2043	16.9972										16.9983	51.2035	16.9981	51.2037	16.9979	51.2037	16.9976	51.2038	16.9972	51.2043
N51	12.209	E16	59.899	51.2035	16.9983	N51	12.221	E16	59.886	51.2037	16.9981	N51	12.225	E16	59.877	51.2037	16.9979	N51	12.227	E16	59.853	51.2038	16.9976	N51	12.26	E16	59.829	51.2043	16.9972										16.9983	51.2035	16.9981	51.2037	16.9979	51.2038	16.9976	51.2038	16.9972	51.2043
N51	12.21	E16	59.899	51.2035	16.9983	N51	12.221	E16	59.886	51.2037	16.9981	N51	12.226	E16	59.876	51.2038	16.9979	N51	12.227	E16	59.853	51.2038	16.9976	N51	12.26	E16	59.83	51.2043	16.9972										16.9983	51.2035	16.9981	51.2037	16.9979	51.2038	16.9975	51.2038	16.9972	51.2043
N51	12.21	E16	59.898	51.2035	16.9983	N51	12.221	E16	59.886	51.2037	16.9981	N51	12.226	E16	59.876	51.2038	16.9979	N51	12.227	E16	59.852	51.2038	16.9975	N51	12.26	E16	59.831	51.2043	16.9972										16.9983	51.2035	16.9981	51.2037	16.9979	51.2038	16.9975	51.2038	16.9972	51.2043
N51	12.211	E16	59.898	51.2035	16.9983	N51	12.222	E16	59.886	51.2037	16.9981	N51	12.226	E16	59.875	51.2038	16.9979	N51	12.227	E16	59.851	51.2038	16.9975	N51	12.26	E16	59.831	51.2043	16.9972										16.9983	51.2035	16.9981	51.2037	16.9979	51.2038	16.9975	51.2038	16.9972	51.2043
N51	12.211	E16	59.898	51.2035	16.9983	N51	12.222	E16	59.886	51.2037	16.9981	N51	12.226	E16	59.875	51.2038	16.9979	N51	12.227	E16	59.851	51.2038	16.9975	N51	12.26	E16	59.832	51.2043	16.9972										16.9983	51.2035	16.9981	51.2037	16.9979	51.2038	16.9975	51.2038	16.9972	51.2043
N51	12.211	E16	59.897	51.2035	16.9983	N51	12.223	E16	59.886	51.2037	16.9981	N51	12.227	E16	59.874	51.2038	16.9979	N51	12.227	E16	59.85	51.2038	16.9975	N51	12.26	E16	59.833	51.2043	16.9972										16.9983	51.2035	16.9981	51.2037	16.9979	51.2038	16.9975	51.2038	16.9972	51.2043
N51	12.212	E16	59.897	51.2035	16.9983	N51	12.223	E16	59.886	51.2037	16.9981	N51	12.227	E16	59.874	51.2038	16.9979	N51	12.228	E16	59.85	51.2038	16.9975	N51	12.26	E16	59.833	51.2043	16.9972										16.9983	51.2035	16.9981	51.2037	16.9979	51.2038	16.9975	51.2038	16.9972	51.2043
N51	12.212	E16	59.897	51.2035	16.9983	N51	12.224	E16	59.887	51.2037	16.9981	N51	12.227	E16	59.873	51.2038	16.9979	N51	12.228	E16	59.849	51.2038	16.9975	N51	12.26	E16	59.834	51.2043	16.9972										16.9983	51.2035	16.9981	51.2037	16.9979	51.2038	16.9975	51.2038	16.9972	51.2043
N51	12.213	E16	59.896	51.2035	16.9983	N51	12.224	E16	59.887	51.2037	16.9981	N51	12.227	E16	59.873	51.2038	16.9979	N51	12.228	E16	59.849	51.2038	16.9975	N51	12.26	E16	59.834	51.2043	16.9972										16.9983	51.2035	16.9981	51.2037	16.9979	51.2038	16.9975	51.2038	16.9973	51.2043
N51	12.213	E16	59.896	51.2035	16.9983	N51	12.224	E16	59.887	51.2037	16.9981	N51	12.228	E16	59.872	51.2038	16.9979	N51	12.228	E16	59.848	51.2038	16.9975	N51	12.26	E16	59.835	51.2043	16.9973										16.9983	51.2036	16.9981	51.2037	16.9979	51.2038	16.9975	51.2038	16.9973	51.2043
N51	12.214	E16	59.896	51.2036	16.9983	N51	12.225	E16	59.888	51.2037	16.9981	N51	12.228	E16	59.872	51.2038	16.9979	N51	12.228	E16	59.847	51.2038	16.9975	N51	12.26	E16	59.835	51.2043	16.9973										16.9983	51.2036	16.9981	51.2037	16.9978	51.2038	16.9975	51.2038	16.9973	51.2043
N51	12.214	E16	59.896	51.2036	16.9983	N51	12.225	E16	59.888	51.2037	16.9981	N51	12.229	E16	59.869	51.2038	16.9978	N51	12.229	E16	59.847	51.2038	16.9975	N51	12.26	E16	59.836	51.2043	16.9973										16.9983	51.2036	16.9981	51.2037	16.9978	51.2038	16.9974	51.2038	16.9973	51.2043
N51	12.215	E16	59.896	51.2036	16.9983	N51	12.225	E16	59.889	51.2037	16.9981	N51	12.23	E16	59.869	51.2038	16.9978	N51	12.229	E16	59.846	51.2038	16.9974	N51	12.26	E16	59.837	51.2043	16.9973										16.9983	51.2036	16.9981	51.2038	16.9978	51.2038	16.9974	51.2038	16.9973	51.2043
N51	12.215	E16	59.896	51.2036	16.9983	N51	12.226	E16	59.889	51.2038	16.9981	N51	12.23	E16	59.868	51.2038	16.9978	N51	12.229	E16	59.846	51.2038	16.9974	N51	12.26	E16	59.837	51.2043	16.9973										16.9983	51.2036	16.9982	51.2038	16.9978	51.2038	16.9974	51.2038	16.9973	51.2043
N51	12.216	E16	59.896	51.2036	16.9983	N51	12.226	E16	59.89	51.2038	16.9982	N51	12.23	E16	59.868	51.2038	16.9978	N51	12.229	E16	59.846	51.2038	16.9974	N51	12.26	E16	59.838	51.2043	16.9973										16.9983	51.2036	16.9982	51.2038	16.9978	51.2039	16.9974	51.2038	16.9973	51.2043
N51	12.216	E16	59.896	51.2036	16.9983	N51	12.226	E16	59.89	51.2038	16.9982	N51	12.231	E16	59.867	51.2039	16.9978	N51	12.229	E16	59.845	51.2038	16.9974	N51	12.26	E16	59.839	51.2043	16.9973										16.9983	51.2036	16.9982	51.2038	16.9978	51.2039	16.9974	51.2038	16.9973	51.2043
N51	12.216	E16	59.896	51.2036	16.9983	N51	12.227	E16	59.891	51.2038	16.9982	N51	12.231	E16	59.867	51.2039	16.9978	N51	12.23	E16	59.844	51.2038	16.9974	N51	12.26	E16	59.839	51.2043	16.9973										16.9983	51.2036	16.9982	51.2038	16.9978	51.2039	16.9974	51.2038	16.9973	51.2043
N51	12.217	E16	59.896	51.2036	16.9983	N51	12.227	E16	59.891	51.2038	16.9982	N51	12.231	E16	59.867	51.2039	16.9978	N51	12.23	E16	59.844	51.2038	16.9974	N51	12.26	E16	59.84	51.2043	16.9973										16.9983	51.2036	16.9982	51.2038	16.9978	51.2039	16.9974	51.2038	16.9973	51.2043
N51	12.217	E16	59.896	51.2036	16.9983	N51	12.227	E16	59.892	51.2038	16.9982	N51	12.232	E16	59.866	51.2039	16.9978	N51	12.23	E16	59.843	51.2038	16.9974	N51	12.26	E16	59.84	51.2043	16.9973										16.9983	51.2036	16.9982	51.2038	16.9978	51.2039	16.9974	51.2038	16.9974	51.2043
N51	12.218	E16	59.896	51.2036	16.9983	N51	12.227	E16	59.893	51.2038	16.9982	N51	12.232	E16	59.866	51.2039	16.9978	N51	12.23	E16	59.843	51.2038	16.9974	N51	12.26	E16	59.841	51.2043	16.9974										16.9983	51.2036	16.9982	51.2038	16.9977	51.2039	16.9974	51.2039	16.9974	51.2043
N51	12.218	E16	59.896	51.2036	16.9983	N51	12.227	E16	59.893	51.2038	16.9982	N51	12.232	E16	59.865	51.2039	16.9977	N51	12.231	E16	59.842	51.2039	16.9974	N51	12.26	E16	59.842	51.2043	16.9974										16.9983	51.2037	16.9982	51.2038	16.9977	51.2039	16.9974	51.2039	16.9974	51.2043
N51	12.219	E16	59.896	51.2037	16.9983	N51	12.227	E16	59.894	51.2038	16.9982	N51	12.233	E16	59.865	51.2039	16.9977	N51	12.231	E16	59.841	51.2039	16.9974	N51	12.26	E16	59.842	51.2043	16.9974										16.9983	51.2037	16.9982	51.2038	16.9977	51.2039	16.9974	51.2039	16.9974	51.2043
N51	12.219	E16	59.896	51.2037	16.9983	N51	12.227	E16	59.895	51.2038	16.9982	N51	12.233	E16	59.864	51.2039	16.9977	N51	12.231	E16	59.841	51.2039	16.9974	N51	12.26	E16	59.843	51.2043	16.9974										16.9983	51.2037	16.9982	51.2038	16.9977	51.2039	16.9973	51.2039	16.9974	51.2043
N51	12.22	E16	59.896	51.2037	16.9983	N51	12.227	E16	59.895	51.2038	16.9982	N51	12.233	E16	59.864	51.2039	16.9977	N51	12.231	E16	59.84	51.2039	16.9973	N51	12.26	E16	59.844	51.2043	16.9974										16.9983	51.2037	16.9983	51.2038	16.9977	51.2039	16.9973	51.2039	16.9974	51.2043
N51	12.22	E16	59.897	51.2037	16.9983	N51	12.227	E16	59.896	51.2038	16.9983	N51	12.234	E16	59.863	51.2039	16.9977	N51	12.231	E16	59.84	51.2039	16.9973	N51	12.26	E16	59.844	51.2043	16.9974										16.9983	51.2037	16.9983	51.2038	16.9977	51.2039	16.9973	51.2039	16.9974	51.2043
N51	12.22	E16	59.897	51.2037	16.9983	N51	12.227	E16	59.897	51.2038	16.9983	N51	12.234	E16	59.863	51.2039	16.9977	N51	12.232	E16	59.839	51.2039	16.9973	N51	12.26	E16	59.845	51.2043	16.9974										16.9983	51.2037	16.9983	51.2038	16.9977	51.2039	16.9973	51.2039	16.9974	51.2043
N51	12.221	E16	59.897	51.2037	16.9983	N51	12.226	E16	59.897	51.2038	16.9983	N51	12.234	E16	59.863	51.2039	16.9977	N51	12.232	E16	59.839	51.2039	16.9973	N51	12.26	E16	59.846	51.2043	16.9974										16.9983	51.2037	16.9983	51.2038	16.9977	51.2039	16.9973	51.2039	16.9974	51.2043
N51	12.221	E16	59.897	51.2037	16.9983	N51	12.226	E16	59.898	51.2038	16.9983	N51	12.235	E16	59.862	51.2039	16.9977	N51	12.232	E16	59.838	51.2039	16.9973	N51	12.26	E16	59.846	51.2043	16.9974										16.9983	51.2037	16.9983	51.2038	16.9977	51.2039	16.9973	51.2039	16.9975	51.2043
N51	12.222	E16	59.897	51.2037	16.9983	N51	12.226	E16	59.899	51.2038	16.9983	N51	12.235	E16	59.862	51.2039	16.9977	N51	12.232	E16	59.838	51.2039	16.9973	N51	12.26	E16	59.847	51.2043	16.9975										16.9983	51.2037	16.9983	51.2038	16.9977	51.2039	16.9973	51.2039	16.9975	51.2043
N51	12.222	E16	59.897	51.2037	16.9983	N51	12.226	E16	59.899	51.2038	16.9983	N51	12.235	E16	59.862	51.2039	16.9977	N51	12.232	E16	59.837	51.2039	16.9973	N51	12.26	E16	59.847	51.2043	16.9975										16.9983	51.2037	16.9983	51.2037	16.9977	51.2039	16.9973	51.2039	16.9975	51.2043
N51	12.223	E16	59.897	51.2037	16.9983	N51	12.225	E16	59.9	51.2037	16.9983	N51	12.236	E16	59.861	51.2039	16.9977	N51	12.233	E16	59.837	51.2039	16.9973	N51	12.26	E16	59.848	51.2043	16.9975										16.9983	51.2037	16.9983	51.2037	16.9977	51.2039	16.9973	51.2039	16.9975	51.2043
N51	12.223	E16	59.898	51.2037	16.9983	N51	12.225	E16	59.9	51.2037	16.9983	N51	12.236	E16	59.861	51.2039	16.9977	N51	12.233	E16	59.836	51.2039	16.9973	N51	12.26	E16	59.849	51.2043	16.9975										16.9983	51.2037	16.9983	51.2037	16.9977	51.2039	16.9973	51.2039	16.9975	51.2043
N51	12.224	E16	59.898	51.2037	16.9983	N51	12.225	E16	59.901	51.2037	16.9983	N51	12.236	E16	59.861	51.2039	16.9977	N51	12.233	E16	59.836	51.2039	16.9973	N51	12.26	E16	59.849	51.2043	16.9975										16.9983	51.2037	16.9983	51.2037	16.9977	51.2039	16.9973	51.2039	16.9975	51.2043
N51	12.224	E16	59.898	51.2037	16.9983	N51	12.224	E16	59.901	51.2037	16.9983	N51	12.237	E16	59.861	51.2039	16.9977	N51	12.233	E16	59.835	51.2039	16.9973	N51	12.26	E16	59.85	51.2043	16.9975										16.9983	51.2037	16.9984	51.2037	16.9977	51.2039	16.9973	51.2039	16.9975	51.2043
N51	12.224	E16	59.899	51.2037	16.9983	N51	12.224	E16	59.902	51.2037	16.9984	N51	12.237	E16	59.86	51.2039	16.9977	N51	12.234	E16	59.835	51.2039	16.9973	N51	12.26	E16	59.851	51.2043	16.9975										16.9983	51.2037	16.9984	51.2037	16.9977	51.204	16.9972	51.2039	16.9975	51.2043
N51	12.225	E16	59.899	51.2037	16.9983	N51	12.223	E16	59.902	51.2037	16.9984	N51	12.238	E16	59.86	51.204	16.9977	N51	12.234	E16	59.834	51.2039	16.9972	N51	12.26	E16	59.851	51.2043	16.9975										16.9983	51.2037	16.9984	51.2037	16.9977	51.204	16.9972	51.2039	16.9975	51.2043
N51	12.225	E16	59.9	51.2037	16.9983	N51	12.223	E16	59.902	51.2037	16.9984	N51	12.238	E16	59.86	51.204	16.9977	N51	12.234	E16	59.834	51.2039	16.9972	N51	12.259	E16	59.852	51.2043	16.9975										16.9983	51.2037	16.9984	51.2037	16.9977	51.204	16.9972	51.2039	16.9975	51.2043
N51	12.225	E16	59.9	51.2037	16.9983	N51	12.222	E16	59.902	51.2037	16.9984	N51	12.238	E16	59.86	51.204	16.9977	N51	12.235	E16	59.833	51.2039	16.9972	N51	12.259	E16	59.852	51.2043	16.9975										16.9983	51.2038	16.9984	51.2037	16.9977	51.204	16.9972	51.2039	16.9976	51.2043
N51	12.226	E16	59.901	51.2038	16.9983	N51	12.222	E16	59.903	51.2037	16.9984	N51	12.239	E16	59.86	51.204	16.9977	N51	12.235	E16	59.833	51.2039	16.9972	N51	12.259	E16	59.853	51.2043	16.9976										16.9984	51.2038	16.9984	51.2037	16.9977	51.204	16.9972	51.2039	16.9976	51.2043
N51	12.226	E16	59.902	51.2038	16.9984	N51	12.221	E16	59.903	51.2037	16.9984	N51	12.239	E16	59.859	51.204	16.9977	N51	12.235	E16	59.832	51.2039	16.9972	N51	12.259	E16	59.854	51.2043	16.9976										16.9984	51.2038	16.9984	51.2037	16.9977	51.204	16.9972	51.2039	16.9976	51.2043
N51	12.226	E16	59.902	51.2038	16.9984	N51	12.221	E16	59.903	51.2037	16.9984	N51	12.24	E16	59.859	51.204	16.9977	N51	12.235	E16	59.832	51.2039	16.9972	N51	12.259	E16	59.854	51.2043	16.9976										16.9984	51.2038	16.9984	51.2037	16.9977	51.204	16.9972	51.2039	16.9976	51.2043
N51	12.226	E16	59.903	51.2038	16.9984	N51	12.22	E16	59.903	51.2037	16.9984	N51	12.24	E16	59.859	51.204	16.9977	N51	12.236	E16	59.832	51.2039	16.9972	N51	12.259	E16	59.855	51.2043	16.9976										16.9984	51.2038	16.9984	51.2037	16.9977	51.204	16.9972	51.2039	16.9976	51.2043
N51	12.227	E16	59.904	51.2038	16.9984	N51	12.22	E16	59.902	51.2037	16.9984	N51	12.24	E16	59.859	51.204	16.9977	N51	12.236	E16	59.831	51.2039	16.9972	N51	12.259	E16	59.856	51.2043	16.9976										16.9984	51.2038	16.9984	51.2037	16.9977	51.204	16.9972	51.2039	16.9976	51.2043
N51	12.227	E16	59.904	51.2038	16.9984	N51	12.219	E16	59.902	51.2037	16.9984	N51	12.241	E16	59.859	51.204	16.9977	N51	12.236	E16	59.831	51.2039	16.9972	N51	12.259	E16	59.856	51.2043	16.9976										16.9984	51.2038	16.9984	51.2037	16.9977	51.204	16.9972	51.2039	16.9976	51.2043
N51	12.227	E16	59.905	51.2038	16.9984	N51	12.219	E16	59.902	51.2037	16.9984	N51	12.241	E16	59.859	51.204	16.9977	N51	12.237	E16	59.83	51.2039	16.9972	N51	12.259	E16	59.857	51.2043	16.9976										16.9984	51.2038	16.9984	51.2037	16.9977	51.204	16.9972	51.2039	16.9976	51.2043
N51	12.227	E16	59.905	51.2038	16.9984	N51	12.219	E16	59.902	51.2037	16.9984	N51	12.242	E16	59.859	51.204	16.9977	N51	12.237	E16	59.83	51.2039	16.9972	N51	12.259	E16	59.858	51.2043	16.9976										16.9984	51.2038	16.9983	51.2036	16.9977	51.204	16.9972	51.2039	16.9976	51.2043
N51	12.227	E16	59.906	51.2038	16.9984	N51	12.218	E16	59.901	51.2036	16.9983	N51	12.242	E16	59.859	51.204	16.9977	N51	12.237	E16	59.829	51.2039	16.9972	N51	12.259	E16	59.858	51.2043	16.9976										16.9984	51.2038	16.9983	51.2036	16.9977	51.2041	16.9972	51.2039	16.9977	51.2043
N51	12.227	E16	59.907	51.2038	16.9984	N51	12.218	E16	59.901	51.2036	16.9983	N51	12.243	E16	59.859	51.2041	16.9977	N51	12.237	E16	59.829	51.2039	16.9972	N51	12.259	E16	59.859	51.2043	16.9977										16.9984	51.2038	16.9983	51.2036	16.9977	51.2041	16.9971	51.204	16.9977	51.2043
N51	12.228	E16	59.907	51.2038	16.9984	N51	12.217	E16	59.9	51.2036	16.9983	N51	12.243	E16	59.859	51.2041	16.9977	N51	12.238	E16	59.828	51.204	16.9971	N51	12.259	E16	59.859	51.2043	16.9977										16.9985	51.2038	16.9983	51.2036	16.9977	51.2041	16.9971	51.204	16.9977	51.2043
N51	12.228	E16	59.908	51.2038	16.9985	N51	12.217	E16	59.9	51.2036	16.9983	N51	12.244	E16	59.859	51.2041	16.9977	N51	12.238	E16	59.828	51.204	16.9971	N51	12.259	E16	59.86	51.2043	16.9977										16.9985	51.2038	16.9983	51.2036	16.9977	51.2041	16.9971	51.204	16.9977	51.2043
N51	12.227	E16	59.909	51.2038	16.9985	N51	12.217	E16	59.899	51.2036	16.9983	N51	12.244	E16	59.859	51.2041	16.9977	N51	12.238	E16	59.827	51.204	16.9971	N51	12.259	E16	59.861	51.2043	16.9977										16.9985	51.2038	16.9983	51.2036	16.9977	51.2041	16.9971	51.204	16.9977	51.2043
N51	12.227	E16	59.91	51.2038	16.9985	N51	12.217	E16	59.898	51.2036	16.9983	N51	12.244	E16	59.859	51.2041	16.9977	N51	12.239	E16	59.827	51.204	16.9971	N51	12.259	E16	59.861	51.2043	16.9977										16.9985	51.2038	16.9983	51.2036	16.9977	51.2041	16.9971	51.204	16.9977	51.2043
N51	12.227	E16	59.91	51.2038	16.9985	N51	12.216	E16	59.898	51.2036	16.9983	N51	12.245	E16	59.859	51.2041	16.9977	N51	12.239	E16	59.827	51.204	16.9971	N51	12.258	E16	59.862	51.2043	16.9977										16.9985	51.2038	16.9983	51.2036	16.9977	51.2041	16.9971	51.204	16.9977	51.2043
N51	12.227	E16	59.911	51.2038	16.9985	N51	12.216	E16	59.897	51.2036	16.9983	N51	12.245	E16	59.859	51.2041	16.9977	N51	12.239	E16	59.827	51.204	16.9971	N51	12.258	E16	59.862	51.2043	16.9977										16.9985	51.2038	16.9983	51.2036	16.9977	51.2041	16.9971	51.204	16.9977	51.2043
N51	12.227	E16	59.911	51.2038	16.9985	N51	12.216	E16	59.896	51.2036	16.9983	N51	12.246	E16	59.859	51.2041	16.9977	N51	12.24	E16	59.826	51.204	16.9971	N51	12.258	E16	59.863	51.2043	16.9977										16.9985	51.2038	16.9983	51.2036	16.9977	51.2041	16.9971	51.204	16.9977	51.2043
N51	12.227	E16	59.912	51.2038	16.9985	N51	12.216	E16	59.896	51.2036	16.9983	N51	12.246	E16	59.859	51.2041	16.9977	N51	12.24	E16	59.826	51.204	16.9971	N51	12.258	E16	59.864	51.2043	16.9977										16.9985	51.2038	16.9982	51.2036	16.9977	51.2041	16.9971	51.204	16.9977	51.2043
N51	12.227	E16	59.912	51.2038	16.9985	N51	12.216	E16	59.895	51.2036	16.9982	N51	12.246	E16	59.859	51.2041	16.9977	N51	12.24	E16	59.826	51.204	16.9971	N51	12.258	E16	59.864	51.2043	16.9977										16.9986	51.2038	16.9982	51.2036	16.9977	51.2041	16.9971	51.204	16.9977	51.2043
N51	12.226	E16	59.913	51.2038	16.9986	N51	12.216	E16	59.894	51.2036	16.9982	N51	12.247	E16	59.859	51.2041	16.9977	N51	12.241	E16	59.825	51.204	16.9971	N51	12.258	E16	59.865	51.2043	16.9977										16.9986	51.2038	16.9982	51.2036	16.9977	51.2041	16.9971	51.204	16.9977	51.2043
N51	12.226	E16	59.914	51.2038	16.9986	N51	12.216	E16	59.894	51.2036	16.9982	N51	12.247	E16	59.859	51.2041	16.9977	N51	12.241	E16	59.825	51.204	16.9971	N51	12.258	E16	59.865	51.2043	16.9977										16.9986	51.2038	16.9982	51.2036	16.9977	51.2041	16.9971	51.204	16.9978	51.2043
N51	12.226	E16	59.914	51.2038	16.9986	N51	12.216	E16	59.893	51.2036	16.9982	N51	12.248	E16	59.859	51.2041	16.9977	N51	12.241	E16	59.825	51.204	16.9971	N51	12.258	E16	59.866	51.2043	16.9978										16.9986	51.2037	16.9982	51.2036	16.9977	51.2041	16.9971	51.204	16.9978	51.2043
N51	12.225	E16	59.915	51.2037	16.9986	N51	12.216	E16	59.892	51.2036	16.9982	N51	12.248	E16	59.859	51.2041	16.9977	N51	12.242	E16	59.825	51.204	16.9971	N51	12.258	E16	59.866	51.2043	16.9978										16.9986	51.2037	16.9982	51.2036	16.9977	51.2041	16.9971	51.204	16.9978	51.2043
N51	12.225	E16	59.915	51.2037	16.9986	N51	12.216	E16	59.892	51.2036	16.9982	N51	12.249	E16	59.859	51.2041	16.9977	N51	12.242	E16	59.825	51.204	16.9971	N51	12.258	E16	59.867	51.2043	16.9978										16.9986	51.2037	16.9982	51.2036	16.9977	51.2041	16.9971	51.204	16.9978	51.2043
N51	12.225	E16	59.915	51.2037	16.9986	N51	12.216	E16	59.891	51.2036	16.9982	N51	12.249	E16	59.859	51.2041	16.9977	N51	12.242	E16	59.825	51.204	16.9971	N51	12.258	E16	59.868	51.2043	16.9978										16.9986	51.2037	16.9982	51.2036	16.9977	51.2042	16.9971	51.2041	16.9978	51.2043
N51	12.224	E16	59.916	51.2037	16.9986	N51	12.217	E16	59.89	51.2036	16.9982	N51	12.25	E16	59.859	51.2042	16.9977	N51	12.243	E16	59.824	51.2041	16.9971	N51	12.257	E16	59.868	51.2043	16.9978										16.9986	51.2037	16.9982	51.2036	16.9977	51.2042	16.9971	51.2041	16.9978	51.2043
N51	12.224	E16	59.916	51.2037	16.9986	N51	12.217	E16	59.89	51.2036	16.9982	N51	12.25	E16	59.86	51.2042	16.9977	N51	12.243	E16	59.824	51.2041	16.9971	N51	12.257	E16	59.869	51.2043	16.9978										16.9986	51.2037	16.9981	51.2036	16.9977	51.2042	16.9971	51.2041	16.9978	51.2043
N51	12.223	E16	59.916	51.2037	16.9986	N51	12.217	E16	59.889	51.2036	16.9981	N51	12.25	E16	59.86	51.2042	16.9977	N51	12.244	E16	59.824	51.2041	16.9971	N51	12.257	E16	59.869	51.2043	16.9978										16.9986	51.2037	16.9981	51.2036	16.9977	51.2042	16.9971	51.2041	16.9978	51.2043
N51	12.223	E16	59.917	51.2037	16.9986	N51	12.217	E16	59.889	51.2036	16.9981	N51	12.251	E16	59.86	51.2042	16.9977	N51	12.244	E16	59.824	51.2041	16.9971	N51	12.257	E16	59.87	51.2043	16.9978										16.9986	51.2037	16.9981	51.2036	16.9977	51.2042	16.9971	51.2041	16.9978	51.2043
N51	12.223	E16	59.917	51.2037	16.9986	N51	12.218	E16	59.888	51.2036	16.9981	N51	12.251	E16	59.86	51.2042	16.9977	N51	12.244	E16	59.825	51.2041	16.9971	N51	12.257	E16	59.871	51.2043	16.9978										16.9986	51.2037	16.9981	51.2036	16.9977	51.2042	16.9971	51.2041	16.9978	51.2043
N51	12.222	E16	59.917	51.2037	16.9986	N51	12.218	E16	59.888	51.2036	16.9981	N51	12.252	E16	59.86	51.2042	16.9977	N51	12.245	E16	59.825	51.2041	16.9971	N51	12.257	E16	59.871	51.2043	16.9978										16.9986	51.2037	16.9981	51.2036	16.9977	51.2042	16.9971	51.2041	16.9979	51.2043
N51	12.222	E16	59.917	51.2037	16.9986	N51	12.218	E16	59.887	51.2036	16.9981	N51	12.252	E16	59.86	51.2042	16.9977	N51	12.245	E16	59.825	51.2041	16.9971	N51	12.257	E16	59.872	51.2043	16.9979										16.9986	51.2037	16.9981	51.2036	16.9977	51.2042	16.9971	51.2041	16.9979	51.2043
N51	12.221	E16	59.917	51.2037	16.9986	N51	12.218	E16	59.887	51.2036	16.9981	N51	12.252	E16	59.86	51.2042	16.9977	N51	12.246	E16	59.825	51.2041	16.9971	N51	12.257	E16	59.872	51.2043	16.9979										16.9986	51.2037	16.9981	51.2037	16.9977	51.2042	16.9971	51.2041	16.9979	51.2043
N51	12.221	E16	59.917	51.2037	16.9986	N51	12.219	E16	59.886	51.2037	16.9981	N51	12.253	E16	59.86	51.2042	16.9977	N51	12.246	E16	59.825	51.2041	16.9971	N51	12.257	E16	59.873	51.2043	16.9979										16.9986	51.2037	16.9981	51.2037	16.9977	51.2042	16.9971	51.2041	16.9979	51.2043
N51	12.22	E16	59.917	51.2037	16.9986	N51	12.219	E16	59.886	51.2037	16.9981	N51	12.253	E16	59.86	51.2042	16.9977	N51	12.246	E16	59.825	51.2041	16.9971	N51	12.256	E16	59.873	51.2043	16.9979										16.9986	51.2037	16.9981	51.2037	16.9977	51.2042	16.9971	51.2041	16.9979	51.2043
N51	12.22	E16	59.917	51.2037	16.9986	N51	12.219	E16	59.885	51.2037	16.9981	N51	12.254	E16	59.861	51.2042	16.9977	N51	12.247	E16	59.825	51.2041	16.9971	N51	12.256	E16	59.874	51.2043	16.9979										16.9986	51.2037	16.9981	51.2037	16.9977	51.2042	16.9971	51.2041	16.9979	51.2043
N51	12.219	E16	59.917	51.2037	16.9986	N51	12.22	E16	59.885	51.2037	16.9981	N51	12.254	E16	59.861	51.2042	16.9977	N51	12.247	E16	59.825	51.2041	16.9971	N51	12.256	E16	59.875	51.2043	16.9979										16.9986	51.2037	16.9981	51.2037	16.9977	51.2042	16.9971	51.2041	16.9979	51.2043
N51	12.219	E16	59.917	51.2037	16.9986	N51	12.22	E16	59.885	51.2037	16.9981	N51	12.254	E16	59.861	51.2042	16.9977	N51	12.247	E16	59.825	51.2041	16.9971	N51	12.256	E16	59.875	51.2043	16.9979										16.9986	51.2037	16.9981	51.2037	16.9977	51.2043	16.9971	51.2041	16.9979	51.2043
N51	12.219	E16	59.916	51.2037	16.9986	N51	12.22	E16	59.884	51.2037	16.9981	N51	12.255	E16	59.861	51.2043	16.9977	N51	12.248	E16	59.826	51.2041	16.9971	N51	12.256	E16	59.876	51.2043	16.9979										16.9986	51.2036	16.9981	51.2037	16.9977	51.2043	16.9971	51.2041	16.9979	51.2043
N51	12.218	E16	59.916	51.2036	16.9986	N51	12.221	E16	59.884	51.2037	16.9981	N51	12.255	E16	59.861	51.2043	16.9977	N51	12.248	E16	59.826	51.2041	16.9971	N51	12.256	E16	59.877	51.2043	16.9979										16.9986	51.2036	16.9981	51.2037	16.9977	51.2043	16.9971	51.2041	16.9979	51.2043
N51	12.218	E16	59.916	51.2036	16.9986	N51	12.221	E16	59.884	51.2037	16.9981	N51	12.256	E16	59.861	51.2043	16.9977	N51	12.248	E16	59.826	51.2041	16.9971	N51	12.256	E16	59.877	51.2043	16.9979										16.9986	51.2036	16.9981	51.2037	16.9977	51.2043	16.9971	51.2041	16.998	51.2043
N51	12.218	E16	59.915	51.2036	16.9986	N51	12.222	E16	59.884	51.2037	16.9981	N51	12.256	E16	59.862	51.2043	16.9977	N51	12.249	E16	59.826	51.2041	16.9971	N51	12.256	E16	59.878	51.2043	16.998										16.9986	51.2036	16.9981	51.2037	16.9977	51.2043	16.9971	51.2041	16.998	51.2043
N51	12.217	E16	59.915	51.2036	16.9986	N51	12.222	E16	59.884	51.2037	16.9981	N51	12.256	E16	59.862	51.2043	16.9977	N51	12.249	E16	59.827	51.2041	16.9971	N51	12.256	E16	59.879	51.2043	16.998										16.9986	51.2036	16.9981	51.2037	16.9977	51.2043	16.9971	51.2041	16.998	51.2043
N51	12.217	E16	59.914	51.2036	16.9986	N51	12.223	E16	59.884	51.2037	16.9981	N51	12.257	E16	59.862	51.2043	16.9977	N51	12.249	E16	59.827	51.2041	16.9971	N51	12.256	E16	59.879	51.2043	16.998										16.9986	51.2036	16.9981	51.2037	16.9977	51.2043	16.9971	51.2042	16.998	51.2043
N51	12.217	E16	59.914	51.2036	16.9986	N51	12.223	E16	59.884	51.2037	16.9981	N51	12.257	E16	59.862	51.2043	16.9977	N51	12.25	E16	59.828	51.2042	16.9971	N51	12.256	E16	59.88	51.2043	16.998										16.9986	51.2036	16.9981	51.2037	16.9977	51.2043	16.9971	51.2042	16.998	51.2043
N51	12.217	E16	59.913	51.2036	16.9986	N51	12.224	E16	59.885	51.2037	16.9981	N51	12.258	E16	59.862	51.2043	16.9977	N51	12.25	E16	59.828	51.2042	16.9971	N51	12.255	E16	59.88	51.2043	16.998										16.9986	51.2036	16.9981	51.2037	16.9977	51.2043	16.9972	51.2042	16.998	51.2043
N51	12.216	E16	59.913	51.2036	16.9986	N51	12.224	E16	59.885	51.2037	16.9981	N51	12.258	E16	59.863	51.2043	16.9977	N51	12.25	E16	59.829	51.2042	16.9972	N51	12.255	E16	59.881	51.2043	16.998										16.9985	51.2036	16.9981	51.2037	16.9977	51.2043	16.9972	51.2042	16.998	51.2043
N51	12.216	E16	59.912	51.2036	16.9985	N51	12.224	E16	59.885	51.2037	16.9981	N51	12.258	E16	59.863	51.2043	16.9977	N51	12.25	E16	59.83	51.2042	16.9972	N51	12.255	E16	59.882	51.2043	16.998										16.9985	51.2036	16.9981	51.2037	16.9977	51.2043	16.9972	51.2042	16.998	51.2043
N51	12.216	E16	59.912	51.2036	16.9985	N51	12.225	E16	59.885	51.2037	16.9981	N51	12.259	E16	59.863	51.2043	16.9977	N51	12.25	E16	59.83	51.2042	16.9972	N51	12.255	E16	59.882	51.2043	16.998										16.9985	51.2036	16.9981	51.2037	16.9977	51.2043	16.9972	51.2042	16.998	51.2043
N51	12.216	E16	59.911	51.2036	16.9985	N51	12.225	E16	59.885	51.2037	16.9981	N51	12.259	E16	59.864	51.2043	16.9977	N51	12.251	E16	59.831	51.2042	16.9972	N51	12.255	E16	59.883	51.2043	16.998										16.9985	51.2036	16.9981	51.2037	16.9977	51.2043	16.9972	51.2042	16.9981	51.2043
N51	12.216	E16	59.91	51.2036	16.9985	N51	12.225	E16	59.886	51.2037	16.9981	N51	12.259	E16	59.864	51.2043	16.9977	N51	12.251	E16	59.831	51.2042	16.9972	N51	12.255	E16	59.884	51.2043	16.9981										16.9985	51.2036	16.9981	51.2038	16.9977	51.2043	16.9972	51.2042	16.9981	51.2043
N51	12.216	E16	59.91	51.2036	16.9985	N51	12.226	E16	59.886	51.2038	16.9981	N51	12.26	E16	59.864	51.2043	16.9977	N51	12.251	E16	59.832	51.2042	16.9972	N51	12.255	E16	59.884	51.2043	16.9981										16.9985	51.2036	16.9981	51.2038	16.9977	51.2043	16.9972	51.2042	16.9981	51.2043
N51	12.216	E16	59.909	51.2036	16.9985	N51	12.226	E16	59.887	51.2038	16.9981	N51	12.26	E16	59.865	51.2043	16.9977	N51	12.251	E16	59.833	51.2042	16.9972	N51	12.255	E16	59.885	51.2043	16.9981										16.9985	51.2036	16.9981	51.2038	16.9977	51.2043	16.9972	51.2042	16.9981	51.2043
N51	12.216	E16	59.909	51.2036	16.9985	N51	12.226	E16	59.888	51.2038	16.9981	N51	12.26	E16	59.865	51.2043	16.9977	N51	12.251	E16	59.833	51.2042	16.9972	N51	12.255	E16	59.886	51.2043	16.9981										16.9985	51.2036	16.9981	51.2038	16.9977	51.2043	16.9972	51.2042	16.9981	51.2043
N51	12.217	E16	59.908	51.2036	16.9985	N51	12.226	E16	59.888	51.2038	16.9981	N51	12.26	E16	59.865	51.2043	16.9977	N51	12.251	E16	59.834	51.2042	16.9972	N51	12.255	E16	59.886	51.2043	16.9981										16.9985	51.2036	16.9981	51.2038	16.9978	51.2043	16.9972	51.2042	16.9981	51.2043
N51	12.217	E16	59.908	51.2036	16.9985	N51	12.226	E16	59.889	51.2038	16.9981	N51	12.261	E16	59.866	51.2043	16.9978	N51	12.251	E16	59.834	51.2042	16.9972	N51	12.255	E16	59.887	51.2043	16.9981										16.9984	51.2036	16.9981	51.2038	16.9978	51.2043	16.9973	51.2042	16.9981	51.2043
N51	12.217	E16	59.907	51.2036	16.9984	N51	12.227	E16	59.889	51.2038	16.9981	N51	12.261	E16	59.866	51.2043	16.9978	N51	12.251	E16	59.835	51.2042	16.9973	N51	12.255	E16	59.888	51.2043	16.9981										16.9984	51.2036	16.9982	51.2038	16.9978	51.2043	16.9973	51.2042	16.9981	51.2043
N51	12.217	E16	59.907	51.2036	16.9984	N51	12.227	E16	59.89	51.2038	16.9982	N51	12.261	E16	59.866	51.2043	16.9978	N51	12.251	E16	59.836	51.2042	16.9973	N51	12.255	E16	59.888	51.2043	16.9981										16.9984	51.2036	16.9982	51.2038	16.9978	51.2043	16.9973	51.2042	16.9981	51.2043
N51	12.218	E16	59.906	51.2036	16.9984	N51	12.227	E16	59.891	51.2038	16.9982	N51	12.261	E16	59.867	51.2043	16.9978	N51	12.251	E16	59.836	51.2042	16.9973	N51	12.255	E16	59.889	51.2043	16.9981										16.9984	51.2036	16.9982	51.2038	16.9978	51.2043	16.9973	51.2042	16.9981	51.2043
N51	12.218	E16	59.906	51.2036	16.9984	N51	12.227	E16	59.891	51.2038	16.9982	N51	12.261	E16	59.867	51.2043	16.9978	N51	12.251	E16	59.837	51.2042	16.9973	N51	12.255	E16	59.889	51.2043	16.9981										16.9984	51.2036	16.9982	51.2038	16.9978	51.2044	16.9973	51.2042	16.9982	51.2043
N51	12.218	E16	59.906	51.2036	16.9984	N51	12.226	E16	59.892	51.2038	16.9982	N51	12.262	E16	59.868	51.2044	16.9978	N51	12.251	E16	59.837	51.2042	16.9973	N51	12.255	E16	59.89	51.2043	16.9982										16.9984	51.2037	16.9982	51.2038	16.9978	51.2044	16.9973	51.2042	16.9982	51.2043
N51	12.219	E16	59.905	51.2037	16.9984	N51	12.226	E16	59.893	51.2038	16.9982	N51	12.262	E16	59.868	51.2044	16.9978	N51	12.251	E16	59.838	51.2042	16.9973	N51	12.255	E16	59.891	51.2043	16.9982										16.9984	51.2037	16.9982	51.2038	16.9978	51.2044	16.9973	51.2042	16.9982	51.2043
N51	12.219	E16	59.905	51.2037	16.9984	N51	12.226	E16	59.893	51.2038	16.9982	N51	12.262	E16	59.868	51.2044	16.9978	N51	12.251	E16	59.839	51.2042	16.9973	N51	12.255	E16	59.891	51.2043	16.9982										16.9984	51.2037	16.9982	51.2038	16.9978	51.2044	16.9973	51.2042	16.9982	51.2043
N51	12.219	E16	59.905	51.2037	16.9984	N51	12.226	E16	59.894	51.2038	16.9982	N51	12.262	E16	59.869	51.2044	16.9978	N51	12.251	E16	59.839	51.2042	16.9973	N51	12.255	E16	59.892	51.2043	16.9982										16.9984	51.2037	16.9982	51.2038	16.9978	51.2044	16.9973	51.2042	16.9982	51.2043
N51	12.22	E16	59.905	51.2037	16.9984	N51	12.226	E16	59.894	51.2038	16.9982	N51	12.262	E16	59.869	51.2044	16.9978	N51	12.25	E16	59.84	51.2042	16.9973	N51	12.255	E16	59.893	51.2043	16.9982										16.9984	51.2037	16.9982	51.2038	16.9978	51.2044	16.9974	51.2042	16.9982	51.2043
N51	12.22	E16	59.904	51.2037	16.9984	N51	12.226	E16	59.895	51.2038	16.9982	N51	12.263	E16	59.87	51.2044	16.9978	N51	12.25	E16	59.841	51.2042	16.9974	N51	12.255	E16	59.893	51.2043	16.9982										16.9984	51.2037	16.9983	51.2038	16.9978	51.2044	16.9974	51.2042	16.9982	51.2043
N51	12.221	E16	59.904	51.2037	16.9984	N51	12.226	E16	59.896	51.2038	16.9983	N51	12.263	E16	59.87	51.2044	16.9978	N51	12.25	E16	59.841	51.2042	16.9974	N51	12.255	E16	59.894	51.2043	16.9982										16.9984	51.2037	16.9983	51.2037	16.9978	51.2044	16.9974	51.2042	16.9982	51.2043
N51	12.221	E16	59.904	51.2037	16.9984	N51	12.225	E16	59.896	51.2037	16.9983	N51	12.263	E16	59.87	51.2044	16.9978	N51	12.25	E16	59.842	51.2042	16.9974	N51	12.255	E16	59.895	51.2043	16.9982										16.9984	51.2037	16.9983	51.2037	16.9978	51.2044	16.9974	51.2042	16.9983	51.2043
N51	12.222	E16	59.904	51.2037	16.9984	N51	12.225	E16	59.897	51.2037	16.9983	N51	12.263	E16	59.871	51.2044	16.9978	N51	12.25	E16	59.842	51.2042	16.9974	N51	12.255	E16	59.896	51.2043	16.9983										16.9984	51.2037	16.9983	51.2037	16.9978	51.2044	16.9974	51.2041	16.9983	51.2043
N51	12.222	E16	59.904	51.2037	16.9984	N51	12.225	E16	59.897	51.2037	16.9983	N51	12.263	E16	59.871	51.2044	16.9978	N51	12.249	E16	59.843	51.2041	16.9974	N51	12.255	E16	59.896	51.2043	16.9983										16.9984	51.2037	16.9983	51.2037	16.9979	51.2044	16.9974	51.2041	16.9983	51.2043
N51	12.223	E16	59.904	51.2037	16.9984	N51	12.225	E16	59.898	51.2037	16.9983	N51	12.264	E16	59.872	51.2044	16.9979	N51	12.249	E16	59.843	51.2041	16.9974	N51	12.255	E16	59.897	51.2043	16.9983										16.9984	51.2037	16.9983	51.2037	16.9979	51.2044	16.9974	51.2041	16.9983	51.2043
N51	12.223	E16	59.905	51.2037	16.9984	N51	12.224	E16	59.898	51.2037	16.9983	N51	12.264	E16	59.872	51.2044	16.9979	N51	12.249	E16	59.844	51.2041	16.9974	N51	12.255	E16	59.898	51.2043	16.9983										16.9984	51.2037	16.9983	51.2037	16.9979	51.2044	16.9974	51.2041	16.9983	51.2043
N51	12.223	E16	59.905	51.2037	16.9984	N51	12.224	E16	59.899	51.2037	16.9983	N51	12.264	E16	59.873	51.2044	16.9979	N51	12.249	E16	59.844	51.2041	16.9974	N51	12.255	E16	59.898	51.2043	16.9983										16.9984	51.2037	16.9983	51.2037	16.9979	51.2044	16.9974	51.2041	16.9983	51.2043
N51	12.224	E16	59.905	51.2037	16.9984	N51	12.224	E16	59.899	51.2037	16.9983	N51	12.264	E16	59.873	51.2044	16.9979	N51	12.248	E16	59.845	51.2041	16.9974	N51	12.255	E16	59.899	51.2043	16.9983										16.9984	51.2037	16.9983	51.2037	16.9979	51.2044	16.9974	51.2041	16.9983	51.2043
N51	12.224	E16	59.905	51.2037	16.9984	N51	12.223	E16	59.9	51.2037	16.9983	N51	12.264	E16	59.874	51.2044	16.9979	N51	12.248	E16	59.845	51.2041	16.9974	N51	12.255	E16	59.899	51.2043	16.9983										16.9984	51.2037	16.9983	51.2037	16.9979	51.2044	16.9974	51.2041	16.9983	51.2043
N51	12.224	E16	59.906	51.2037	16.9984	N51	12.223	E16	59.901	51.2037	16.9983	N51	12.265	E16	59.874	51.2044	16.9979	N51	12.248	E16	59.846	51.2041	16.9974	N51	12.255	E16	59.9	51.2043	16.9983										16.9984	51.2037	16.9983	51.2037	16.9979	51.2044	16.9974	51.2041	16.9983	51.2043
N51	12.225	E16	59.906	51.2037	16.9984	N51	12.223	E16	59.901	51.2037	16.9983	N51	12.265	E16	59.875	51.2044	16.9979	N51	12.247	E16	59.846	51.2041	16.9974	N51	12.255	E16	59.901	51.2043	16.9983										16.9984	51.2037	16.9983	51.2037	16.9979	51.2044	16.9975	51.2041	16.9983	51.2043
N51	12.225	E16	59.906	51.2037	16.9984	N51	12.222	E16	59.901	51.2037	16.9983	N51	12.265	E16	59.875	51.2044	16.9979	N51	12.247	E16	59.847	51.2041	16.9975	N51	12.255	E16	59.901	51.2043	16.9983										16.9984	51.2037	16.9984	51.2037	16.9979	51.2044	16.9975	51.2041	16.9984	51.2043
N51	12.225	E16	59.907	51.2037	16.9984	N51	12.222	E16	59.902	51.2037	16.9984	N51	12.265	E16	59.876	51.2044	16.9979	N51	12.247	E16	59.847	51.2041	16.9975	N51	12.255	E16	59.902	51.2043	16.9984										16.9985	51.2038	16.9984	51.2037	16.9979	51.2044	16.9975	51.2041	16.9984	51.2043
N51	12.226	E16	59.908	51.2038	16.9985	N51	12.222	E16	59.902	51.2037	16.9984	N51	12.265	E16	59.876	51.2044	16.9979	N51	12.246	E16	59.847	51.2041	16.9975	N51	12.255	E16	59.903	51.2043	16.9984										16.9985	51.2038	16.9984	51.2037	16.9979	51.2044	16.9975	51.2041	16.9984	51.2042
N51	12.226	E16	59.908	51.2038	16.9985	N51	12.221	E16	59.903	51.2037	16.9984	N51	12.266	E16	59.877	51.2044	16.9979	N51	12.246	E16	59.848	51.2041	16.9975	N51	12.254	E16	59.903	51.2042	16.9984										16.9985	51.2038	16.9984	51.2037	16.9979	51.2044	16.9975	51.2041	16.9984	51.2042
N51	12.226	E16	59.909	51.2038	16.9985	N51	12.221	E16	59.903	51.2037	16.9984	N51	12.266	E16	59.877	51.2044	16.9979	N51	12.246	E16	59.848	51.2041	16.9975	N51	12.254	E16	59.904	51.2042	16.9984										16.9985	51.2038	16.9984	51.2037	16.998	51.2044	16.9975	51.2041	16.9984	51.2042
N51	12.226	E16	59.909	51.2038	16.9985	N51	12.221	E16	59.904	51.2037	16.9984	N51	12.266	E16	59.878	51.2044	16.998	N51	12.245	E16	59.848	51.2041	16.9975	N51	12.254	E16	59.905	51.2042	16.9984										16.9985	51.2038	16.9984	51.2037	16.998	51.2044	16.9975	51.2041	16.9984	51.2042
N51	12.226	E16	59.91	51.2038	16.9985	N51	12.22	E16	59.904	51.2037	16.9984	N51	12.266	E16	59.878	51.2044	16.998	N51	12.245	E16	59.848	51.2041	16.9975	N51	12.254	E16	59.906	51.2042	16.9984										16.9985	51.2038	16.9984	51.2037	16.998	51.2044	16.9975	51.2041	16.9984	51.2042
N51	12.227	E16	59.911	51.2038	16.9985	N51	12.22	E16	59.904	51.2037	16.9984	N51	12.266	E16	59.879	51.2044	16.998	N51	12.245	E16	59.849	51.2041	16.9975	N51	12.254	E16	59.906	51.2042	16.9984										16.9985	51.2038	16.9984	51.2037	16.998	51.2044	16.9975	51.2041	16.9984	51.2042
N51	12.227	E16	59.912	51.2038	16.9985	N51	12.219	E16	59.904	51.2037	16.9984	N51	12.266	E16	59.88	51.2044	16.998	N51	12.244	E16	59.849	51.2041	16.9975	N51	12.254	E16	59.907	51.2042	16.9984										16.9985	51.2038	16.9984	51.2037	16.998	51.2045	16.9975	51.2041	16.9985	51.2042
N51	12.227	E16	59.912	51.2038	16.9985	N51	12.219	E16	59.905	51.2037	16.9984	N51	12.267	E16	59.88	51.2045	16.998	N51	12.244	E16	59.849	51.2041	16.9975	N51	12.254	E16	59.908	51.2042	16.9985										16.9986	51.2038	16.9984	51.2037	16.998	51.2045	16.9975	51.2041	16.9985	51.2042
N51	12.227	E16	59.913	51.2038	16.9986	N51	12.219	E16	59.905	51.2037	16.9984	N51	12.267	E16	59.881	51.2045	16.998	N51	12.244	E16	59.849	51.2041	16.9975	N51	12.254	E16	59.908	51.2042	16.9985										16.9986	51.2038	16.9984	51.2036	16.998	51.2045	16.9975	51.2041	16.9985	51.2042
N51	12.227	E16	59.914	51.2038	16.9986	N51	12.218	E16	59.905	51.2036	16.9984	N51	12.267	E16	59.881	51.2045	16.998	N51	12.243	E16	59.849	51.2041	16.9975	N51	12.254	E16	59.909	51.2042	16.9985										16.9986	51.2038	16.9984	51.2036	16.998	51.2045	16.9975	51.2041	16.9985	51.2042
N51	12.227	E16	59.914	51.2038	16.9986	N51	12.218	E16	59.905	51.2036	16.9984	N51	12.267	E16	59.882	51.2045	16.998	N51	12.243	E16	59.849	51.2041	16.9975	N51	12.254	E16	59.91	51.2042	16.9985										16.9986	51.2038	16.9984	51.2036	16.998	51.2045	16.9975	51.204	16.9985	51.2042
N51	12.227	E16	59.915	51.2038	16.9986	N51	12.217	E16	59.904	51.2036	16.9984	N51	12.267	E16	59.883	51.2045	16.998	N51	12.242	E16	59.849	51.204	16.9975	N51	12.254	E16	59.91	51.2042	16.9985										16.9986	51.2038	16.9984	51.2036	16.998	51.2045	16.9975	51.204	16.9985	51.2042
N51	12.227	E16	59.916	51.2038	16.9986	N51	12.217	E16	59.904	51.2036	16.9984	N51	12.267	E16	59.883	51.2045	16.998	N51	12.242	E16	59.849	51.204	16.9975	N51	12.254	E16	59.911	51.2042	16.9985										16.9986	51.2038	16.9984	51.2036	16.9981	51.2045	16.9975	51.204	16.9985	51.2042
N51	12.226	E16	59.916	51.2038	16.9986	N51	12.217	E16	59.904	51.2036	16.9984	N51	12.267	E16	59.884	51.2045	16.9981	N51	12.242	E16	59.85	51.204	16.9975	N51	12.254	E16	59.912	51.2042	16.9985										16.9986	51.2038	16.9984	51.2036	16.9981	51.2045	16.9975	51.204	16.9985	51.2042
N51	12.226	E16	59.917	51.2038	16.9986	N51	12.216	E16	59.903	51.2036	16.9984	N51	12.267	E16	59.884	51.2045	16.9981	N51	12.241	E16	59.85	51.204	16.9975	N51	12.254	E16	59.912	51.2042	16.9985										16.9986	51.2038	16.9984	51.2036	16.9981	51.2045	16.9975	51.204	16.9986	51.2042
N51	12.226	E16	59.918	51.2038	16.9986	N51	12.216	E16	59.903	51.2036	16.9984	N51	12.268	E16	59.885	51.2045	16.9981	N51	12.241	E16	59.85	51.204	16.9975	N51	12.254	E16	59.913	51.2042	16.9986										16.9986	51.2038	16.9984	51.2036	16.9981	51.2045	16.9975	51.204	16.9986	51.2042
N51	12.226	E16	59.918	51.2038	16.9986	N51	12.216	E16	59.902	51.2036	16.9984	N51	12.268	E16	59.886	51.2045	16.9981	N51	12.24	E16	59.85	51.204	16.9975	N51	12.254	E16	59.914	51.2042	16.9986										16.9987	51.2037	16.9984	51.2036	16.9981	51.2045	16.9975	51.204	16.9986	51.2042
N51	12.225	E16	59.919	51.2037	16.9987	N51	12.215	E16	59.902	51.2036	16.9984	N51	12.268	E16	59.886	51.2045	16.9981	N51	12.24	E16	59.85	51.204	16.9975	N51	12.254	E16	59.914	51.2042	16.9986										16.9987	51.2037	16.9983	51.2036	16.9981	51.2045	16.9975	51.204	16.9986	51.2042
N51	12.225	E16	59.92	51.2037	16.9987	N51	12.215	E16	59.901	51.2036	16.9983	N51	12.268	E16	59.887	51.2045	16.9981	N51	12.24	E16	59.85	51.204	16.9975	N51	12.253	E16	59.915	51.2042	16.9986										16.9987	51.2037	16.9983	51.2036	16.9981	51.2045	16.9975	51.204	16.9986	51.2042
N51	12.225	E16	59.92	51.2037	16.9987	N51	12.215	E16	59.9	51.2036	16.9983	N51	12.268	E16	59.887	51.2045	16.9981	N51	12.239	E16	59.85	51.204	16.9975	N51	12.253	E16	59.915	51.2042	16.9986										16.9987	51.2037	16.9983	51.2036	16.9981	51.2045	16.9975	51.204	16.9986	51.2042
N51	12.225	E16	59.921	51.2037	16.9987	N51	12.215	E16	59.9	51.2036	16.9983	N51	12.268	E16	59.888	51.2045	16.9981	N51	12.239	E16	59.85	51.204	16.9975	N51	12.253	E16	59.916	51.2042	16.9986										16.9987	51.2037	16.9983	51.2036	16.9981	51.2045	16.9975	51.204	16.9986	51.2042
N51	12.224	E16	59.921	51.2037	16.9987	N51	12.215	E16	59.899	51.2036	16.9983	N51	12.268	E16	59.889	51.2045	16.9981	N51	12.238	E16	59.849	51.204	16.9975	N51	12.253	E16	59.917	51.2042	16.9986										16.9987	51.2037	16.9983	51.2036	16.9981	51.2045	16.9975	51.204	16.9986	51.2042
N51	12.224	E16	59.922	51.2037	16.9987	N51	12.215	E16	59.898	51.2036	16.9983	N51	12.268	E16	59.889	51.2045	16.9981	N51	12.238	E16	59.849	51.204	16.9975	N51	12.253	E16	59.917	51.2042	16.9986										16.9987	51.2037	16.9983	51.2036	16.9982	51.2045	16.9975	51.204	16.9986	51.2042
N51	12.224	E16	59.922	51.2037	16.9987	N51	12.215	E16	59.898	51.2036	16.9983	N51	12.268	E16	59.89	51.2045	16.9982	N51	12.238	E16	59.849	51.204	16.9975	N51	12.253	E16	59.918	51.2042	16.9986										16.9987	51.2037	16.9983	51.2036	16.9982	51.2045	16.9975	51.2039	16.9986	51.2042
N51	12.223	E16	59.922	51.2037	16.9987	N51	12.215	E16	59.897	51.2036	16.9983	N51	12.267	E16	59.89	51.2045	16.9982	N51	12.237	E16	59.849	51.2039	16.9975	N51	12.253	E16	59.918	51.2042	16.9986										16.9987	51.2037	16.9983	51.2036	16.9982	51.2045	16.9975	51.2039	16.9987	51.2042
N51	12.223	E16	59.923	51.2037	16.9987	N51	12.215	E16	59.897	51.2036	16.9983	N51	12.267	E16	59.891	51.2045	16.9982	N51	12.237	E16	59.849	51.2039	16.9975	N51	12.252	E16	59.919	51.2042	16.9987										16.9987	51.2037	16.9983	51.2036	16.9982	51.2045	16.9975	51.2039	16.9987	51.2042
N51	12.222	E16	59.923	51.2037	16.9987	N51	12.215	E16	59.896	51.2036	16.9983	N51	12.267	E16	59.891	51.2045	16.9982	N51	12.237	E16	59.848	51.2039	16.9975	N51	12.252	E16	59.919	51.2042	16.9987										16.9987	51.2037	16.9982	51.2036	16.9982	51.2045	16.9975	51.2039	16.9987	51.2042
N51	12.222	E16	59.923	51.2037	16.9987	N51	12.215	E16	59.895	51.2036	16.9982	N51	12.267	E16	59.892	51.2045	16.9982	N51	12.236	E16	59.848	51.2039	16.9975	N51	12.252	E16	59.92	51.2042	16.9987										16.9987	51.2037	16.9982	51.2036	16.9982	51.2045	16.9975	51.2039	16.9987	51.2042
N51	12.222	E16	59.923	51.2037	16.9987	N51	12.215	E16	59.895	51.2036	16.9982	N51	12.267	E16	59.893	51.2045	16.9982	N51	12.236	E16	59.848	51.2039	16.9975	N51	12.252	E16	59.92	51.2042	16.9987										16.9987	51.2037	16.9982	51.2036	16.9982	51.2045	16.9975	51.2039	16.9987	51.2042
N51	12.221	E16	59.923	51.2037	16.9987	N51	12.215	E16	59.894	51.2036	16.9982	N51	12.267	E16	59.893	51.2045	16.9982	N51	12.235	E16	59.848	51.2039	16.9975	N51	12.251	E16	59.921	51.2042	16.9987										16.9987	51.2037	16.9982	51.2036	16.9982	51.2044	16.9975	51.2039	16.9987	51.2042
N51	12.221	E16	59.923	51.2037	16.9987	N51	12.215	E16	59.893	51.2036	16.9982	N51	12.266	E16	59.894	51.2044	16.9982	N51	12.235	E16	59.848	51.2039	16.9975	N51	12.251	E16	59.921	51.2042	16.9987										16.9987	51.2037	16.9982	51.2036	16.9982	51.2044	16.9975	51.2039	16.9987	51.2042
N51	12.22	E16	59.924	51.2037	16.9987	N51	12.216	E16	59.893	51.2036	16.9982	N51	12.266	E16	59.894	51.2044	16.9982	N51	12.235	E16	59.847	51.2039	16.9975	N51	12.251	E16	59.922	51.2042	16.9987										16.9987	51.2037	16.9982	51.2036	16.9982	51.2044	16.9975	51.2039	16.9987	51.2042
N51	12.22	E16	59.924	51.2037	16.9987	N51	12.216	E16	59.892	51.2036	16.9982	N51	12.266	E16	59.895	51.2044	16.9982	N51	12.234	E16	59.847	51.2039	16.9975	N51	12.25	E16	59.922	51.2042	16.9987										16.9987	51.2037	16.9982	51.2036	16.9983	51.2044	16.9974	51.2039	16.9987	51.2042
N51	12.22	E16	59.924	51.2037	16.9987	N51	12.216	E16	59.891	51.2036	16.9982	N51	12.266	E16	59.896	51.2044	16.9983	N51	12.234	E16	59.846	51.2039	16.9974	N51	12.25	E16	59.923	51.2042	16.9987										16.9987	51.2037	16.9982	51.2036	16.9983	51.2044	16.9974	51.2039	16.9987	51.2042
N51	12.219	E16	59.924	51.2037	16.9987	N51	12.216	E16	59.891	51.2036	16.9982	N51	12.266	E16	59.896	51.2044	16.9983	N51	12.234	E16	59.846	51.2039	16.9974	N51	12.25	E16	59.923	51.2042	16.9987										16.9987	51.2037	16.9982	51.2036	16.9983	51.2044	16.9974	51.2039	16.9987	51.2041
N51	12.219	E16	59.924	51.2037	16.9987	N51	12.216	E16	59.89	51.2036	16.9982	N51	12.265	E16	59.897	51.2044	16.9983	N51	12.234	E16	59.845	51.2039	16.9974	N51	12.249	E16	59.924	51.2041	16.9987										16.9987	51.2036	16.9982	51.2036	16.9983	51.2044	16.9974	51.2039	16.9987	51.2041
N51	12.218	E16	59.924	51.2036	16.9987	N51	12.217	E16	59.89	51.2036	16.9982	N51	12.265	E16	59.897	51.2044	16.9983	N51	12.234	E16	59.845	51.2039	16.9974	N51	12.249	E16	59.924	51.2041	16.9987										16.9987	51.2036	16.9981	51.2036	16.9983	51.2044	16.9974	51.2039	16.9987	51.2041
N51	12.218	E16	59.923	51.2036	16.9987	N51	12.217	E16	59.889	51.2036	16.9981	N51	12.265	E16	59.898	51.2044	16.9983	N51	12.233	E16	59.844	51.2039	16.9974	N51	12.249	E16	59.924	51.2041	16.9987										16.9987	51.2036	16.9981	51.2036	16.9983	51.2044	16.9974	51.2039	16.9988	51.2041
N51	12.217	E16	59.923	51.2036	16.9987	N51	12.217	E16	59.888	51.2036	16.9981	N51	12.265	E16	59.898	51.2044	16.9983	N51	12.233	E16	59.844	51.2039	16.9974	N51	12.249	E16	59.925	51.2041	16.9988										16.9987	51.2036	16.9981	51.2036	16.9983	51.2044	16.9974	51.2039	16.9988	51.2041
N51	12.217	E16	59.923	51.2036	16.9987	N51	12.217	E16	59.888	51.2036	16.9981	N51	12.264	E16	59.899	51.2044	16.9983	N51	12.233	E16	59.843	51.2039	16.9974	N51	12.248	E16	59.925	51.2041	16.9988										16.9987	51.2036	16.9981	51.2036	16.9983	51.2044	16.9974	51.2039	16.9988	51.2041
N51	12.217	E16	59.923	51.2036	16.9987	N51	12.217	E16	59.887	51.2036	16.9981	N51	12.264	E16	59.899	51.2044	16.9983	N51	12.233	E16	59.843	51.2039	16.9974	N51	12.248	E16	59.925	51.2041	16.9988										16.9987	51.2036	16.9981	51.2036	16.9983	51.2044	16.9974	51.2039	16.9988	51.2041
N51	12.216	E16	59.923	51.2036	16.9987	N51	12.218	E16	59.887	51.2036	16.9981	N51	12.264	E16	59.899	51.2044	16.9983	N51	12.232	E16	59.842	51.2039	16.9974	N51	12.248	E16	59.926	51.2041	16.9988										16.9987	51.2036	16.9981	51.2036			16.9974	51.2039	16.9988	51.2041
N51	12.216	E16	59.922	51.2036	16.9987	N51	12.218	E16	59.887	51.2036	16.9981							N51	12.232	E16	59.842	51.2039	16.9974	N51	12.247	E16	59.926	51.2041	16.9988										16.9987	51.2036	16.9981	51.2036			16.9974	51.2039	16.9988	51.2041
N51	12.216	E16	59.922	51.2036	16.9987	N51	12.218	E16	59.886	51.2036	16.9981							N51	12.232	E16	59.841	51.2039	16.9974	N51	12.247	E16	59.926	51.2041	16.9988										16.9987	51.2036							16.9988	51.2041
N51	12.215	E16	59.922	51.2036	16.9987													N51	12.232	E16	59.841	51.2039	16.9974	N51	12.247	E16	59.926	51.2041	16.9988																		16.9988	51.2041
																								N51	12.246	E16	59.927	51.2041	16.9988																		16.9988	51.2041
																								N51	12.246	E16	59.927	51.2041	16.9988
																																									lat	Pi	R	r	c	C
																																									51.2	3.14159	6366.2	3989.08	25064.2	40000	111.111	69.6226
																																									0.893609
[truncated: 37 more columns]

## Sheet: Data processing
L1 (walking 1)	Accumulated angle with side of turning (walking 1)	L2 (walking 2)	Accumulated angle with side of turning (walking 2)	L3 (walking 3)	Accumulated angle with side of turning (walking 3)	L4 (walking 4)	Accumulated angle with side of turning (walking 4)	L5 (walking 5)	Accumulated angle with side of turning (walking 5)	L Running	Accumulated angle with side of turning (running)		East 1 (walking 1)	North 1 (walking 1)			Change of direction 1 (walking 1)	Angular deviations 1 (walking 1)	Change of direction with side of turning (walking 1)	Angular deviations with side of turning (walking 1)	East 2 (walking 2)	North 2 (walking 2)			Change of direction 2 (walking 2)	Angular deviations 2	Change of direction with side of turning (walking 2)	Angular deviations with side of turning (walking 2)	East 3 (walking 3)	North 3 (walking 3)			Change of direction 3 (walking 3)	Angular deviations 3	Change of direction with side of turning (walking 3)	Angular deviations with side of turning (walking 3)	East 4 (walking 4)	North 4 (walking 4)			Change of direction 4 (walking 4)	Angular deviations 4 (walking 4)	Change of direction with side of turning (walking 4)	Angular deviations with side of turning (walking 4)	East 5 (walking 5)	North 5 (walking 5)			Change of direction 5 (walking 5)
0	0	0	0	0	0	0	0	0	0	0	0		472.42	335.185	8.12264	-1.85185	0.0358099	0	-0.0358099	0	493.307	285.185	-6.96226	-3.7037	0.184597	0	0.184597	0	452.694	296.296	-3.48113	7.40741	0	0	-0.233415	0	473.581	368.519	2.32075	-7.40741	0.0977076	0	-0.0977076	0	396.996	316.667	-5.80189	3.7037	0.56815
9.14763	-0.0358099	9.01224	0.184597	10.0617	-0.233415	8.9013	-0.0977076	8.67873	0.56815	11.7781	0.0977076		480.543	333.333	6.96226	-1.85185	0	0.0358099	8.09076e-12	-0.0358099	486.345	281.481	-4.64151	-3.7037	0.673491	0.184597	-0.673491	0.184597	449.213	303.704	-1.16038	5.55556	0.205908	0	-0.205908	-0.233415	475.902	361.111	1.16038	-5.55556	0.205908	0.0977076	-0.205908	-0.0977076	391.194	320.37	-5.80189	0	0.30896
17.1349	-0.0358099	17.3575	-0.488894	16.7776	-0.439322	15.6172	-0.303615	14.4806	0.25919	24.7167	0.189794		487.505	331.481	6.96226	-1.85185	0	0.0358099	-8.10042e-12	-0.0358099	481.703	277.778	-5.80189	0	0.30896	0.858088	-0.30896	-0.488894	448.052	309.259	0	7.40741	0.559752	0.205908	-0.559752	-0.439322	477.062	355.556	0	-5.55556	0	0.303615	0	-0.303615	385.392	320.37	-5.80189	1.85185	0.0706637
25.1221	-0.0358099	23.1593	-0.797854	24.185	-0.999074	21.1728	-0.303615	21.3075	0.188527	37.1618	0.691397		494.468	329.63	6.96226	-1.85185	0.308185	0.0358099	-0.308185	-0.0358099	475.902	277.778	-5.80189	1.85185	0.0706637	1.16705	-0.0706637	-0.797854	448.052	316.667	2.32075	3.7037	0	0.765659	6.88102e-15	-0.999074	477.062	350	0	-5.55556	0	0.303615	0	-0.303615	379.59	322.222	-4.64151	1.85185	0.0706637
33.1094	-0.343995	30.8131	-0.868517	30.2095	-0.999074	26.7283	-0.303615	26.974	0.25919	50.1681	0.691397		501.43	327.778	5.80189	-3.7037	0.306647	0.343995	-0.306647	-0.343995	470.1	279.63	-4.64151	1.85185	0.631421	1.23771	-0.631421	-0.868517	450.373	320.37	2.32075	3.7037	0.442894	0.765659	-0.442894	-0.999074	477.062	344.444	0	-5.55556	0.395702	0.303615	-0.395702	-0.303615	374.949	324.074	-5.80189	1.85185	0.179934
40.9613	-0.650642	37.3064	-1.49994	36.2339	-1.44197	32.2839	-0.699317	34.6277	0.0792563	63.1744	0.548522		507.232	324.074	4.64151	-5.55556	0.490091	0.650642	-0.490091	-0.650642	465.458	281.481	-3.48113	5.55556	0.559752	1.86913	-0.559752	-1.49994	452.694	324.074	5.80189	3.7037	0.56815	1.20855	-0.56815	-1.44197	477.062	338.889	-2.32075	-5.55556	0	0.699317	-3.47978e-11	-0.699317	369.147	325.926	-3.48113	1.85185	0.385903
48.6777	-1.14073	44.6894	-2.05969	44.0858	-2.01012	39.3333	-0.699317	39.9607	-0.306647	75.0635	-0.411815		511.873	318.519	1.16038	-5.55556	0	1.14073	5.85121e-14	-1.14073	461.977	287.037	0	7.40741	0.395702	2.42888	-0.395702	-2.05969	458.496	327.778	4.64151	0	0.379623	1.7767	-0.379623	-2.01012	474.741	333.333	-2.32075	-5.55556	0.358728	0.699317	-0.358728	-0.699317	365.666	327.778	-4.64151	5.55556	0.0584312
54.5668	-1.14073	52.7638	-2.45539	48.7273	-2.38974	47.2097	-1.05805	48.5041	-0.248216	86.8416	-0.765659		513.034	312.963	1.16038	-5.55556	0.361296	1.14073	-0.361296	-1.14073	461.977	294.444	2.32075	5.55556	0.795471	2.82459	-0.795471	-2.45539	463.137	327.778	4.64151	-1.85185	0.436743	2.15633	-0.436743	-2.38974	472.42	327.778	-3.48113	-3.7037	0.358728	1.05805	0.358728	-1.05805	361.024	333.333	-3.48113	3.7037	0.194678
61.2827	-1.50203	59.8133	-3.25086	54.3938	-2.82648	53.5676	-0.699317	54.0352	-0.442894	99.4222	-1.7767		514.194	307.407	-1.16038	-7.40741	0	1.50203	-3.75525e-11	-1.50203	464.298	300	4.64151	1.85185	0.379623	3.62006	-0.379623	-3.25086	467.779	325.926	3.48113	-3.7037	0.194678	2.59307	-0.194678	-2.82648	468.939	324.074	-2.32075	-5.55556	0.501603	1.41677	-0.501603	-0.699317	357.543	337.037	-2.32075	3.7037	0.353844
69.0237	-1.50203	66.3067	-3.63049	60.7518	-3.02116	60.6171	-1.20092	58.4059	-0.796738	111.026	-2.51608		513.034	300	-1.16038	-7.40741	0.240314	1.50203	-0.240314	-1.50203	468.939	301.852	5.80189	0	0.673491	3.99968	-0.673491	-3.63049	471.26	322.222	3.48113	-5.55556	0.559752	2.78775	-0.559752	-3.02116	466.619	318.519	-4.64151	-3.7037	#NUM!	1.91838	2.37258e-11	-1.20092	355.222	340.741	-1.16038	5.55556	0
76.7646	-1.74234	72.1085	-4.30398	68.9616	-3.58091	67.3086	-1.20092	64.295	-0.796738	123.249	-3.10192		511.873	292.593	-2.32075	-5.55556	0.0436205	1.74234	-0.0436205	-1.74234	474.741	301.852	4.64151	-3.7037	0.741917	4.67317	-0.741917	-4.30398	474.741	316.667	0	-3.7037	0.395702	3.3475	-0.395702	-3.58091	461.977	314.815	-4.64151	-3.7037	0.293868	#NUM!	-0.293868	-1.20092	354.062	346.296	-1.16038	5.55556	0.205908
84.6409	-1.78596	79.6269	-5.04589	72.6653	-3.97662	74.8269	-1.49479	70.184	-1.00265	133.175	-3.14159		509.552	287.037	-3.48113	-7.40741	0.457983	1.78596	-0.457983	-1.78596	479.383	298.148	1.16038	-7.40741	0.55109	5.41509	-0.55109	-5.04589	474.741	312.963	-2.32075	-5.55556	2.10734e-08	3.7432	5.84728e-11	-3.97662	457.336	311.111	-4.64151	-1.85185	#NUM!	#NUM!	-3.39327e-11	-1.49479	352.902	351.852	0	5.55556	0.395702
94.7026	-2.24395	88.1947	-5.59698	79.7148	-3.97662	80.4934	-1.49479	75.7396	-1.39835	144.953	-3.45156		506.071	279.63	-4.64151	-3.7037	#NUM!	2.24395	4.79372e-11	-2.24395	480.543	290.741	-2.32075	-5.55556	0.358728	5.96618	-0.358728	-5.59698	472.42	307.407	-2.32075	-5.55556	0.358728	3.7432	-0.358728	-3.97662	452.694	309.259	-4.64151	-1.85185	0.379623	#NUM!	-0.379623	-1.49479	352.902	357.407	2.32075	5.55556	0.358728
103.048	-2.24395	95.2441	-5.95571	86.7642	-4.33535	86.9868	-1.87441	83.6159	-1.75708	157.224	-3.7432		501.43	275.926	-4.64151	-3.7037	#NUM!	#NUM!	-4.78024e-11	-2.24395	478.222	285.185	-3.48113	-3.7037	0.507406	6.32491	-0.507406	-5.95571	470.1	301.852	-3.48113	-3.7037	0.436743	4.10193	-0.436743	-4.33535	448.052	307.407	-5.80189	0	0	#NUM!	0	-1.87441	355.222	362.963	3.48113	3.7037	0.142875
110.566	-2.24395	101.602	-6.46312	93.1222	-4.77209	92.7887	-1.87441	89.9739	-1.89995	170.497			496.788	272.222	-4.64151	-3.7037	0.413526	#NUM!	-0.413526	-2.24395	474.741	281.481	-5.80189	-1.85185	0.61792	6.83231	-0.61792	-6.46312	466.619	298.148	-4.64151	-1.85185	0.379623	4.53867	-0.379623	-4.77209	442.251	307.407	-4.64151	0	0.30896	#NUM!	0.30896	-1.87441	358.703	366.667	4.64151	3.7037	0.364531
118.084	-2.65747	108.429	-7.08104	99.6155	-5.15171	97.4302	-1.56545	97.4922	-2.26448				492.147	268.519	-6.96226	-1.85185	0.568925	#NUM!	-0.568925	-2.65747	468.939	279.63	-5.80189	1.85185	0	7.45023	-1.12811e-11	-7.08104	461.977	296.296	-4.64151	0	0.30896	4.9183	-0.30896	-5.15171	437.609	307.407	-5.80189	-1.85185	0.30896	#NUM!	-0.30896	-1.56545	363.345	370.37	5.80189	1.85185	0.30896
126.072	-3.2264	115.256	-7.08104	104.257	-5.46067	105.084	-1.87441	104.319	-2.57344				485.185	266.667	-5.80189	1.85185	2.10734e-08	#NUM!	1.13893e-11	-3.2264	463.137	281.481	-5.80189	1.85185	0.702085	7.45023	-0.702085	-7.08104	457.336	296.296	-5.80189	1.85185	0.507406	5.22726	-0.507406	-5.46067	431.807	305.556	-4.64151	0	0.30896	#NUM!	-0.30896	-1.87441	369.147	372.222	4.64151	0	0
133.725	-3.2264	122.083	-7.78312	111.084	-5.96808	109.725	-2.18337	108.961	-2.57344				479.383	268.519	-5.80189	1.85185	0.565838	#NUM!	-0.565838	-3.2264	457.336	283.333	-3.48113	5.55556	0.404364	8.15232	-0.404364	-7.78312	451.534	298.148	-3.48113	3.7037	0.142875	5.73466	0.142875	-5.96808	427.166	305.556	-5.80189	1.85185	0.0706637	#NUM!	-0.0706637	-2.18337	373.788	372.222	5.80189	0	0.30896
140.552	-3.79223	131.119	-8.18749	117.442	-5.8252	116.552	-2.25404	114.763	-2.8824				473.581	270.37	-4.64151	5.55556	0.0584312	#NUM!	0.0584312	-3.79223	453.854	288.889	-1.16038	7.40741	0.155388	8.55668	-0.155388	-8.18749	448.052	301.852	-4.64151	3.7037	0	5.87754	1.19914e-10	-5.8252	421.364	307.407	-4.64151	1.85185	0.379623	#NUM!	0.379623	-2.25404	379.59	372.222	5.80189	-1.85185	0.30896
149.923	-3.7338	139.687	-8.34288	124.133	-5.8252	123.046	-1.87441	121.589	-2.57344				468.939	275.926	-3.48113	3.7037	0.599042	#NUM!	-0.599042	-3.7338	452.694	296.296	0	5.55556	0.75443	8.71207	-0.75443	-8.34288	443.411	305.556	-4.64151	3.7037	0.0902214	5.87754	-0.0902214	-5.8252	416.722	309.259	-5.80189	0	0.673491	#NUM!	-0.673491	-1.87441	385.392	370.37	5.80189	0	0
157.107	-4.33285	145.243	-9.09731	130.825	-5.91542	128.848	-2.5479	127.391	-2.57344				465.458	279.63	-1.16038	7.40741	0.155388	#NUM!	-0.155388	-4.33285	452.694	301.852	3.48113	3.7037	0.142875	9.4665	-0.142875	-9.09731	438.769	309.259	-5.80189	5.55556	0.0526536	5.96776	-0.0526536	-5.91542	410.92	309.259	-4.64151	3.7037	0.184597	#NUM!	0.184597	-2.5479	391.194	370.37	4.64151	0	0
164.848	-4.48823	150.774	-9.24018	139.966	-5.96808	137.193	-2.36331	132.033	-2.57344				464.298	287.037	0	5.55556	0.205908	#NUM!	-0.205908	-4.48823	456.175	305.556	4.64151	3.7037	1.05311	9.60938	-1.05311	-9.24018	432.968	314.815	-3.48113	3.7037	0	6.02041	3.26927e-11	-5.96808	406.279	312.963	-3.48113	1.85185	0.184597	#NUM!	-0.184597	-2.36331	395.836	370.37	4.64151	0	0
170.404	-4.69414	158.292	-10.2933	145.497	-5.96808	141.699	-2.5479	136.674	-2.57344				464.298	292.593	1.16038	5.55556	#NUM!	#NUM!	3.28874e-11	-4.69414	460.817	309.259	4.64151	-1.85185	0.293868	10.6625	-0.293868	-10.2933	429.486	318.519	-3.48113	3.7037	0.358728	6.02041	-0.358728	-5.96808	402.798	314.815	-4.64151	3.7037	0.293868	#NUM!	0.293868	-2.5479	400.477	370.37	5.80189	0	0
177.12	-4.69414	164.786	-10.5872	151.855	-6.32681	148.39	-2.25404	142.476	-2.57344				465.458	298.148	1.16038	5.55556	0.691397	#NUM!	-0.691397	-4.69414	465.458	307.407	4.64151	-3.7037	0.501603	10.9564	-0.501603	-10.5872	426.005	322.222	-2.32075	5.55556	0	6.37914	9.12922e-14	-6.32681	398.156	318.519	-4.64151	1.85185	0.436743	#NUM!	-0.436743	-2.25404	406.279	370.37	4.64151	0	0.379623
183.836	-5.38554	172.304	-11.0888	158.077	-6.32681	154.884	-2.69078	147.118	-2.95307				466.619	303.704	4.64151	3.7037	0.364531	#NUM!	-0.364531	-5.38554	470.1	303.704	2.32075	-5.55556	0.791404	11.458	-0.791404	-11.0888	423.685	327.778	-2.32075	5.55556	0.395702	6.37914	-0.395702	-6.32681	393.515	320.37	-3.48113	3.7037	0	#NUM!	-6.50698e-11	-2.69078	410.92	370.37	4.64151	-1.85185	0.379623
191.354	-5.75007	180.18	-11.8802	165.954	-6.72251	161.242	-2.69078	152.784	-2.57344				471.26	307.407	5.80189	1.85185	0.30896	#NUM!	-0.30896	-5.75007	472.42	298.148	-2.32075	-5.55556	0.606944	12.2494	-0.606944	-11.8802	421.364	333.333	0	5.55556	0	6.77484	0	-6.72251	390.034	324.074	-3.48113	3.7037	0.194678	#NUM!	-0.194678	-2.69078	415.562	368.519	5.80189	0	0.379623
198.181	-6.05903	187.23	-12.4871	171.509	-6.72251	167.6	-2.88546	158.586	-2.95307				477.062	309.259	4.64151	0	0.673491	#NUM!	-0.673491	-6.05903	470.1	292.593	-5.80189	-3.7037	0.56815	12.8563	-0.56815	-12.4871	421.364	338.889	0	5.55556	0	6.77484	0	-6.72251	386.552	327.778	-3.48113	5.55556	0.256137	#NUM!	-0.256137	-2.88546	421.364	368.519	4.64151	-1.85185	0.379623
205.699	-6.73252	195.908	-13.0553	177.065	-6.72251	174.983	-3.14159	164.253	-2.57344				481.703	309.259	4.64151	-3.7037	0.501603	#NUM!	-0.501603	-6.73252	464.298	288.889	-4.64151	0	0.673491	13.4245	-0.673491	-13.0553	421.364	344.444	0	5.55556	0.205908	6.77484	-0.205908	-6.72251	383.071	333.333	-1.16038	3.7037	0.303615	#NUM!	-0.303615	-3.14159	426.005	366.667	4.64151	0	0.379623
212.391	-7.23412	200.55	-13.7288	182.62	-6.92842	179.02	-3.44521	168.894	-2.95307				486.345	305.556	2.32075	-5.55556	0.395702	#NUM!	-0.395702	-7.23412	459.656	288.889	-4.64151	3.7037	0.142875	14.098	-0.142875	-13.7288	421.364	350	1.16038	5.55556	0.0977076	6.98075	-0.0977076	-6.92842	381.911	337.037	0	5.55556	0	#NUM!	0	-3.44521	430.647	366.667	4.64151	-1.85185	0
219.44	-7.62983	207.241	-13.8716	189.336	-7.02612	186.069	-3.44521	175.387	-2.95307				488.666	300	0	-5.55556	0.75443	#NUM!	-0.75443	-7.62983	455.015	292.593	-3.48113	3.7037	0.548522	14.2408	-0.548522	-13.8716	422.524	355.556	1.16038	3.7037	0.0977076	7.07846	0.0977076	-7.02612	381.911	342.593	0	3.7037	0.559752	#NUM!	-0.559752	-3.44521	435.288	364.815	4.64151	-1.85185	0.379623
224.996	-8.38426	213.599	-14.4202	193.373	-6.92842	189.773	-4.00496	181.881	-2.57344				488.666	294.444	-3.48113	-3.7037	0.436743	#NUM!	-0.436743	-8.38426	451.534	296.296	-1.16038	5.55556	0.60161	14.7893	-0.60161	-14.4202	423.685	359.259	1.16038	5.55556	0.189794	7.17617	-0.189794	-6.92842	381.911	346.296	3.48113	5.55556	0.631421	#NUM!	-0.631421	-4.00496	439.93	362.963	5.80189	0	0.379623
232.181	-8.821	220.315	-15.0218	200.089	-7.11821	197.156	-4.63638	187.683	-2.95307				485.185	290.741	-4.64151	-1.85185	1.05311	#NUM!	-1.05311	-8.821	450.373	301.852	2.32075	5.55556	0.866135	15.391	-0.866135	-15.0218	424.845	364.815	2.32075	5.55556	0.686201	7.36596	-0.686201	-7.11821	385.392	351.852	4.64151	1.85185	0.379623	#NUM!	-0.379623	-4.63638	445.732	362.963	4.64151	-1.85185	0.379623
238.674	-9.87411	227.365	-15.8879	207.966	-7.80441	202.822	-5.016	194.176	-2.57344				480.543	288.889	-4.64151	3.7037	0.337553	#NUM!	-0.337553	-9.87411	452.694	307.407	5.80189	1.85185	0.688583	16.2571	-0.688583	-15.8879	427.166	370.37	3.48113	1.85185	0.327472	8.05216	0.327472	-7.80441	390.034	353.704	4.64151	0	0.30896	#NUM!	-0.30896	-5.016	450.373	361.111	5.80189	0	0
245.366	-10.2117	235.019	-16.5765	212.472	-7.47694	207.464	-5.32496	199.978	-2.57344				475.902	292.593	-2.32075	3.7037	0.765659	#NUM!	-0.765659	-10.2117	458.496	309.259	4.64151	-1.85185	0.293868	16.9457	-0.293868	-16.5765	430.647	372.222	3.48113	3.7037	0.327472	8.37963	-0.327472	-7.47694	394.675	353.704	5.80189	-1.85185	0.179934	#NUM!	-0.179934	-5.32496	456.175	361.111	4.64151	0	0
250.563	-10.9773	240.685	-16.8703	218.003	-7.80441	214.291	-5.5049	204.619	-2.57344				473.581	296.296	1.16038	5.55556	0.353844	#NUM!	-0.353844	-10.9773	463.137	307.407	4.64151	-3.7037	0.142875	17.2395	-0.142875	-16.8703	434.128	375.926	3.48113	1.85185	0	8.70711	1.15109e-13	-7.80441	400.477	351.852	3.48113	-1.85185	0.522151	#NUM!	-0.522151	-5.5049	460.817	361.111	5.80189	0	0
257.279	-11.3312	249.03	-17.0132	222.509	-7.80441	218.797	-6.02705	210.421	-2.57344				474.741	301.852	3.48113	5.55556	0.631421	#NUM!	-0.631421	-11.3312	467.779	303.704	3.48113	-3.7037	0.194678	17.3824	-0.194678	-17.0132	437.609	377.778	3.48113	1.85185	0.184597	8.70711	0.184597	-7.80441	403.958	350	3.48113	-5.55556	0	#NUM!	1.39816e-10	-6.02705	466.619	361.111	5.80189	0	0.30896
265.489	-11.9626	255.388	-17.2079	227.842	-7.61981	227.007	-6.02705	216.223	-2.8824				478.222	307.407	4.64151	1.85185	0.688583	#NUM!	-0.688583	-11.9626	471.26	300	3.48113	-5.55556	0.955454	17.5771	-0.955454	-17.2079	441.09	379.63	4.64151	3.7037	0.673491	8.8917	-0.673491	-7.61981	407.439	344.444	2.32075	-3.7037	0.353844	#NUM!	-0.353844	-6.02705	472.42	361.111	5.80189	-1.85185	0.30896
271.155	-12.6512	263.598	-18.1634	235.36	-8.2933	233.031	-6.38089	223.877	-2.57344				482.864	309.259	5.80189	-1.85185	0.364531	#NUM!	-0.364531	-12.6512	474.741	294.444	-2.32075	-5.55556	0.795471	18.5325	-0.795471	-18.1634	445.732	383.333	4.64151	0	0.30896	9.56519	0.30896	-8.2933	409.76	340.741	1.16038	-5.55556	0.411815	#NUM!	-0.411815	-6.38089	478.222	359.259	4.64151	0	0.30896
278.809	-13.0157	269.821	-18.9588	240.002	-7.98434	239.747	-6.79271	228.518	-2.8824				488.666	307.407	4.64151	-3.7037	0.337553	#NUM!	-0.337553	-13.0157	472.42	288.889	-4.64151	-1.85185	0.379623	19.328	-0.379623	-18.9588	450.373	383.333	5.80189	1.85185	0.688583	9.87415	-0.688583	-7.98434	410.92	335.185	-1.16038	-5.55556	0.0977076	#NUM!	-0.0977076	-6.79271	482.864	359.259	5.80189	-1.85185	0.179934
286.327	-13.3533	276.314	-19.3384	246.829	-8.67293	245.636	-6.89042	235.345	-3.06234				493.307	303.704	2.32075	-3.7037	0.353844	#NUM!	-0.353844	-13.3533	467.779	287.037	-4.64151	0	0.30896	19.7076	-0.30896	-19.3384	456.175	385.185	4.64151	-1.85185	0.293868	10.5627	-0.293868	-8.67293	409.76	329.63	-1.16038	-3.7037	0.450815	#NUM!	-0.450815	-6.89042	488.666	357.407	3.48113	-1.85185	0.385903
292.352	-13.7071	280.955	-19.6474	253.322	-8.9668	250.5	-7.34123	239.851	-3.44824				495.628	300	1.16038	-5.55556	0.60161	#NUM!	-0.60161	-13.7071	463.137	287.037	-5.80189	1.85185	0.507406	20.0166	-0.507406	-19.6474	460.817	383.333	4.64151	-3.7037	1.78392	10.8566	-1.35767	-8.9668	408.6	325.926	-3.48113	-3.7037	0	#NUM!	-1.46725e-13	-7.34123	492.147	355.556	4.64151	-5.55556	0.136247
298.241	-14.3087	288.609	-20.1548	260.014		257.685	-7.34123	248.395	-3.58449				496.788	294.444	-2.32075	-5.55556	0.646342	#NUM!	-0.646342	-14.3087	457.336	288.889	-3.48113	3.7037	1.389	20.524	1.389	-20.1548	465.458	379.63	-465.458	-379.63	#DIV/0!	12.6405	#DIV/0!	-10.3245	405.119	322.222	-3.48113	-3.7037	0.145877	#NUM!	-0.145877	-7.34123	496.788	350	2.32075	-3.7037	1.52398
306.117		295.794				263.216		254.419	-3.58449				494.468	288.889	-494.468	-288.889	#DIV/0!	#NUM!	#DIV/0!	-14.9551	453.854	292.593	-453.854	-292.593	#DIV/0!	21.913	#DIV/0!	-18.7658									401.637	318.519	-401.637	-318.519	#DIV/0!	#NUM!	#DIV/0!	-7.48711	499.109	346.296	-499.109	-346.296	#DIV/0!
								256.605
- mean turning to the right
+ mean turning to the left
[truncated: 11 more columns]
