# Supplementary material for: Effect of orienteering experience on walking and running in the absence of vision and hearing
Source: PeerJ. 2019 Sep 26;7:e7736. doi: 10.7717/peerj.7736 (PMC6766364; doi:10.7717/peerj.7736)
Supplement: Dataset S3 — (Foot-O) Foot-orienteering group. (T&F) Track and field group. (W) Women. (M) Men. [file peerj-07-7736-s003.xlsx]

## Sheet: Angular deviation in walking
Mean angular deviation in walking	Sport	Sex
0.0464794	Foot-O	W
0.0767765	Foot-O	W
0.0578707	Foot-O	W
0.0389181	Foot-O	W
0.0381702	Foot-O	W
0.0117981	Foot-O	M
0.0178505	Foot-O	M
0.00910661	Foot-O	M
0.0277205	Foot-O	M
0.0137568	Foot-O	M
0.00876844	Foot-O	M
0.029182	T&F	W
0.0882873	T&F	W
0.038915	T&F	W
0.0102327	T&F	W
0.00988747	T&F	W
0.0177269	T&F	M
0.0237237	T&F	M
0.00995888	T&F	M
0.0461036	T&F	M
0.0220392	T&F	M
0.0413307	T&F	M
