# Supplementary material for: Effect of orienteering experience on walking and running in the absence of vision and hearing
Source: PeerJ. 2019 Sep 26;7:e7736. doi: 10.7717/peerj.7736 (PMC6766364; doi:10.7717/peerj.7736)
Supplement: Dataset S4 — (Foot-O) Foot-orienteering group. (T&F) Track and field group. (W) Women. (M) Men. [file peerj-07-7736-s004.xlsx]

## Sheet: Angular deviation in running
Mean angular deviation in running	Sport	Sex
0.0329224	Foot-O	W
0.00261495	Foot-O	W
0.0170418	Foot-O	W
0.0262481	Foot-O	W
0.0219547	Foot-O	W
0.0121902	Foot-O	M
0.018889	Foot-O	M
0.00931855	Foot-O	M
0.0231481	Foot-O	M
0.01296	Foot-O	M
0.0267148	Foot-O	M
0.00307842	T&F	W
0.0248504	T&F	W
0.000632378	T&F	W
0.00458869	T&F	W
0.00762372	T&F	W
0.020891	T&F	M
0.0338606	T&F	M
0.0177522	T&F	M
0.0172986	T&F	M
0.00269697	T&F	M
0.00648483	T&F	M
