# Supplementary material for: Effect of orienteering experience on walking and running in the absence of vision and hearing
Source: PeerJ. 2019 Sep 26;7:e7736. doi: 10.7717/peerj.7736 (PMC6766364; doi:10.7717/peerj.7736)
Supplement: Dataset S5 — (Foot-O) Foot-orienteering group. (T&F) Track and field group. (W) Women. (M) Men. [file peerj-07-7736-s005.xlsx]

## Sheet: Mean covered distance 
Mean covered distance during walking tests	Sport	Sex
373	Foot-O	W
414	Foot-O	W
344	Foot-O	W
376	Foot-O	W
244.4	Foot-O	W
333	Foot-O	M
261.5	Foot-O	M
348.6	Foot-O	M
376.4	Foot-O	M
353.4	Foot-O	M
273.833	Foot-O	M
352.6	T&F	W
486.4	T&F	W
448.8	T&F	W
374.2	T&F	W
387.667	T&F	W
301.667	T&F	M
488.4	T&F	M
238.571	T&F	M
453.8	T&F	M
402.2	T&F	M
409.4	T&F	M
