# Supplementary material for: Effect of orienteering experience on walking and running in the absence of vision and hearing
Source: PeerJ. 2019 Sep 26;7:e7736. doi: 10.7717/peerj.7736 (PMC6766364; doi:10.7717/peerj.7736)
Supplement: Dataset S6 — (Foot-O) Foot-orienteering group. (T&F) Track and field group. (W) Women. (M) Men. [file peerj-07-7736-s006.xlsx]

## Sheet: Average speed during walking
Mean speed during walking tests	Sport	Sex
1.41262	Foot-O	W
1.33506	Foot-O	W
1.07051	Foot-O	W
1.32841	Foot-O	W
0.901518	Foot-O	W
1.48502	Foot-O	M
1.37886	Foot-O	M
1.37734	Foot-O	M
1.48178	Foot-O	M
1.58712	Foot-O	M
1.31073	Foot-O	M
1.11443	T&F	W
1.56792	T&F	W
1.46456	T&F	W
1.2519	T&F	W
1.53053	T&F	W
1.15586	T&F	M
1.58151	T&F	M
1.19615	T&F	M
1.5673	T&F	M
1.33404	T&F	M
1.34222	T&F	M
