# Supplementary material for: Effect of orienteering experience on walking and running in the absence of vision and hearing
Source: PeerJ. 2019 Sep 26;7:e7736. doi: 10.7717/peerj.7736 (PMC6766364; doi:10.7717/peerj.7736)
Supplement: Dataset S10 — (Foot-O) Foot-orienteering group. (T&F) Track and field group. (W) Women. (M) Men. [file peerj-07-7736-s010.xlsx]

## Sheet: Ranks
Walking rank	Running rank	Coordination rank	Sport	Sex
7	10	10	Foot-O	W
9	2	2	Foot-O	W
8	6	4.5	Foot-O	W
6	9	6	Foot-O	W
4	7	1	Foot-O	W
4	4	6	Foot-O	M
7	8	2	Foot-O	M
2	3	7.5	Foot-O	M
10	10	3.5	Foot-O	M
5	5	1	Foot-O	M
1	11	3.5	Foot-O	M
3	3	8	T&F	W
10	8	8	T&F	W
5	1	4.5	T&F	W
2	4	3	T&F	W
1	5	8	T&F	W
6	9	7.5	T&F	M
9	12	11	T&F	M
3	7	12	T&F	M
12	6	5	T&F	M
8	1	9	T&F	M
11	2	10	T&F	M
