# Supplementary material for: Effect of orienteering experience on walking and running in the absence of vision and hearing
Source: PeerJ. 2019 Sep 26;7:e7736. doi: 10.7717/peerj.7736 (PMC6766364; doi:10.7717/peerj.7736)
Supplement: Dataset S11 — (Foot-O) Foot-orienteering group. (T&F) Track and field group. (W) Women. (M) Men. (−1) Right. (0) Right and left. (1) Left. [file peerj-07-7736-s011.xlsx]

## Sheet: Lateralization and turning
Sport	Sex	Lateralization of upper limb	Lateralization of lower limb	Turning tendency walking 1	Turning tendency walking 2	Turning tendency walking 3	Turning tendency walking 4	Turning tendency walking 5	Turning tendency in walking (all 5 results)	Turning tendency in running	Turning tendency in "Walk to the goal 5 m"	Turning tendency in "Walk to the goal 10 m"
Foot-O	W	-1	-1	-1	-1	-1	-1	-1	-1	-1	0	0
Foot-O	W	-1	-1	1	1	1	1	1	1	0	0	0
Foot-O	W	-1	-1	1	1	1	1	1	1	-1	1	0
Foot-O	W	-1	-1	0	-1	-1	-1	-1	0	-1	1	0
Foot-O	W	-1	-1	-1	-1	-1	-1	-1	-1	-1	1	0
Foot-O	M	1	-1	1	1	1	1	0	0	1	0	0
Foot-O	M	0	-1	-1	1	1	1	1	0	1	-1	0
Foot-O	M	-1	-1	1	1	1	-1	-1	0	1	0	1
Foot-O	M	-1	-1	-1	-1	-1	-1	-1	1	1	0	0
Foot-O	M	-1	-1	1	1	1	1	1	0	1	0	0
Foot-O	M	0	1	-1	-1	0	1	1	-1	-1	0	0
T&F	W	-1	-1	1	-1	-1	-1	-1	0	1	0	0
T&F	W	-1	-1	1	1	1	1	1	1	1	1	0
T&F	W	0	-1	1	1	1	1	1	1	-1	1	0
T&F	W	-1	-1	0	1	1	1	1	0	1	0	0
T&F	W	-1	-1	-1	0	-1	-1	1	0	-1	0	-1
T&F	M	-1	-1	-1	-1	-1	-1	-1	-1	-1	0	0
T&F	M	-1	-1	1	-1	-1	-1	-1	0	-1	1	0
T&F	M	-1	-1	0	0	0	1	1	0	-1	0	-1
T&F	M	-1	-1	1	1	1	1	1	1	1	-1	-1
T&F	M	-1	-1	1	1	1	1	1	1	-1	0	1
T&F	M	-1	-1	-1	-1	-1	-1	-1	-1	1	-1	0
